# Supplementary material for: Application of data reconciliation to a dynamically operated wastewater treatment process with off-gas measurements
Source: Royal Society of Chemistry journal article supplement (doi:10.1039/d2ew00006g), 2022-01-01
Supplement: d2ew00006g1.pdf [file d2ew00006g1.pdf]

## **Application of data reconciliation to a dynamically operated wastewater treatment process with off-gas measurements**

Quan H. Le<sup>a</sup>, Peter J.T. Verheijen<sup>b</sup>, Mark C.M. van Loosdrecht<sup>b</sup> and Eveline I.P. Volcke<sup>a</sup>

### **SUPPLEMENTARY INFORMATION**

## Supplementary Information A: Materials and methods

### A1. Data reconciliation and gross error detection procedure

#### Data reconciliation

The general procedure for mass balance-based data reconciliation applied in this study was proposed by Le (2019), based on the work of Verheijen (2010), and is schematically represented in Figure A1. Data reconciliation requires three types of input information:

- (1) A list of key process variables to be identified. These variables can be either measured or unmeasured ones.
- (2) A pre-processed raw data set which contains mean values and standard error of the means of the measured variables.
- (3) A set of mass balances based on the plant configuration, which the variables need to adhere to. The input form of mass balances determines the formulation of the objective function and the pre-processing of the input data

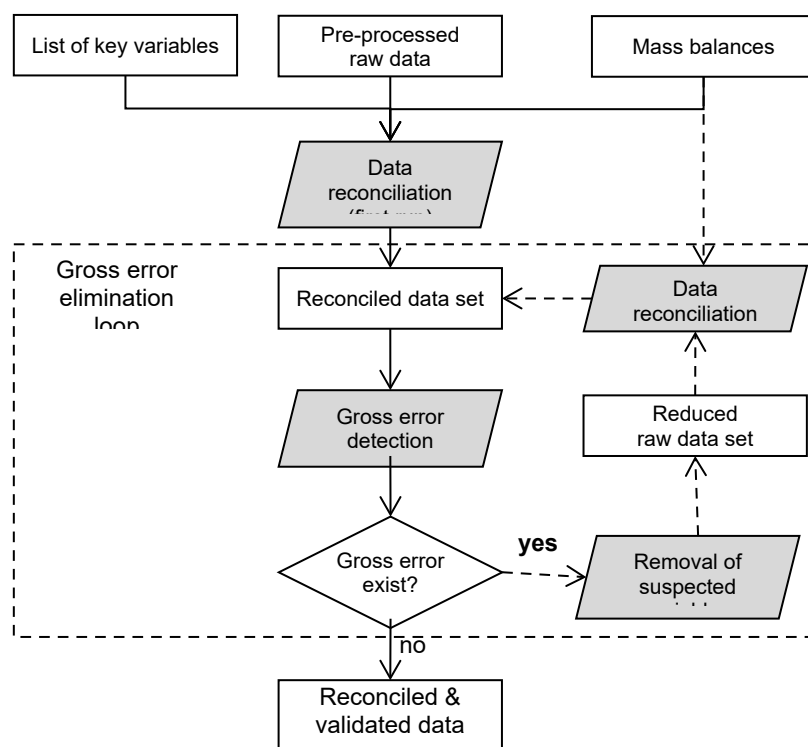

Figure A1. General mass-balance-based data reconciliation procedure (Le, 2019) applied in this study

The **identification of key process variables** means that their value is calculated from other, measured variables and from the prevailing constraints, such that improved estimates of their values are obtained. These new estimates, i.e., reconciled values, meet all the constraints (i.e., fit all mass balances) and are therefore considered more reliable and accurate (have a smaller standard deviation or error) than the original values. Key variables may be measured or not. In case a key variable is measured, the new estimate is considered improved compared to the original measurements. In case the key variable is not measured, the new estimate is considered improved compared to the value directly calculated from original measurements (using the available set of mass balances).

The **objective function** of the data reconciliation problem in this work was defined as the weighted least squares of the distance between the measurements vector and the vector of reconciled values weighted by the measurement error (Eq. 1).

$$\left. \begin{array}{l} \min \sum \frac{(y - \bar{x})^2}{\sigma_y^2} \\ \text{subject to } f(\bar{x}, u) = 0 \end{array} \right\} \text{Eq.1}$$

in which  $y$  denotes measured variables,  $\bar{x}$  reconciled variables and  $u$  unmeasured variables.  $f(\bar{x}, u) = 0$  is a set of equality constraint equations or mass balances.  $\sigma_y^2$  is a weighing factor, which usually the standard error of the mean of  $y$ . If it is assumed that the measurement errors are normally distributed with zero mean, the solution for this constrained optimization problem gives maximum likelihood estimates of process variables, so they are minimum variance and unbiased estimators (Verheijen, 2010).

The equality constrained nonlinear data reconciliation problem defined by Eq. 1 was solved using the classical method of Lagrange multiplier (Fletcher 2000).

The implementation of the data reconciliation procedure using the raw data set and a set of constraints will result in a reconciled data set. This reconciled data set typically contains four types of variables: reconciled measured variables, unreconciled measured variables, reconciled unmeasured variables and unreconciled unmeasured variables.

### Gross error detection

The gross error is based on testing the data set against the alternative hypothesis: (1) the null hypothesis  $H_0$  that is no gross error is present and the alternative hypothesis  $H_1$ : that gross errors are present.

Three common test reported in literature were used in this study namely the global, measurement, and nodal tests (Table 1). The global test compares each of the new estimates with the original measurements,  $y - \bar{x}$ . The nodal test substitutes each of the measurements into the active constraints,  $f(y)$ . In these two cases the variances of the respective residuals can be derived easily. The measurement test makes use of the sum-of-squares of the residuals, which has a known distribution. All three tests calculated p-values, for the dataset (global and nodal test) or for individual variables (for the measurement test). When  $p < 0.05$  there is something wrong which could be a gross error, when  $p \geq 0.05$  no gross error is detected.

Table 1. Basic tests in gross error detection (Verheijen, 2010)

| Test             | Description                                             | Measure                |
|------------------|---------------------------------------------------------|------------------------|
| Global test      | Weighted sum of residuals squared gives an overall view | $y - \bar{x}$          |
| Nodal test       | Each individual constraint misfit is considered         | $f(y)$                 |
| Measurement test | Each individual measurement is considered               | $\sum (y - \bar{x})^2$ |

For more details on the data reconciliation and gross error detection procedures, the reader is referred to Le, 2019.

## A2. Mass balances - stoichiometric and conversion factors

The information summarized in Table 2 results in the following mass balances (all in mol·h<sup>-1</sup>), which have been applied in this study:

### Mass balances including off-gas measurements

$$\mathbf{m1 \text{ (total nitrogen):}} Q_{in} \cdot NH_{in} \cdot 1.053 - Q_{in} \cdot (1.053 \cdot NH_{eff} + NO_{2eff} + NO_{3eff}) - Q_{off} \cdot K_{off} \cdot NO_{off} - Q_{off} \cdot K_{off} \cdot N_2O_{off} = 0$$

$$\mathbf{m2 \text{ (oxygen):}} (Q_{aer} + Q_{inf}) \cdot O_{2aer} \cdot K_{aer} - Q_{in} \cdot (1.434 \cdot NO_{2eff} + 1.934 \cdot NO_{3eff}) - Q_{off} \cdot (N_2O_{off} + 1.25 \cdot NO_{off}) \cdot K_{off} - Q_{off} \cdot O_{2off} \cdot K_{off} - 0.428 \cdot bCOD_{in} \cdot Q_{in} = 0$$

$$\mathbf{m3 \text{ (carbon):}} (TIC:NH)_{in} \cdot Q_{in} \cdot 1.053 \cdot NH_{in} + (Q_{aer} + Q_{inf}) \cdot CO_{2aer} \cdot K_{aer} + 0.303 \cdot COD_{in} \cdot Q_{in} - Q_{off} \cdot CO_{2off} \cdot K_{off} - 0.067 \cdot Q_{in} \cdot (NO_{2eff} + NO_{3eff}) = 0$$

$$\mathbf{m4 \text{ (nitrogen gas):}} (Q_{aer} + Q_{inf}) \cdot (10^6 - O_{2aer} - CO_{2aer}) \cdot K_{aer} - Q_{off} \cdot (10^6 - O_{2off} - CO_{2off}) \cdot K_{off} = 0$$

### Mass balances without off-gas measurements

$$\mathbf{m5 \text{ (total nitrogen):}} Q_{in} \cdot NH_{in} \cdot 1.053 - Q_{in} \cdot (1.053 \cdot NH_{eff} + NO_{2eff} + NO_{3eff}) = 0$$

$$\mathbf{m6 \text{ (oxygen):}} OC - Q_{in} \cdot (1.434 \cdot NO_{2eff} + 1.934 \cdot NO_{3eff}) - 0.428 \cdot COD_{in} \cdot Q_{in} = 0$$

Table A1. Stoichiometric matrix of the biological conversions. Negative values denote consumption, positive values denote production.

| components →<br>[mole m <sup>-3</sup> ]                      | CH <sub>x</sub> O <sub>y</sub><br>(bCOD =<br>organic<br>carbon) | NH <sub>4</sub> <sup>+</sup> | CO <sub>2</sub>  | O <sub>2</sub>                 | C <sub>5</sub> H <sub>7</sub> NO <sub>2</sub><br>(biomass) | NO <sub>2</sub> <sup>-</sup> | NO <sub>3</sub> <sup>-</sup> | N <sub>2</sub> O | NO |
|--------------------------------------------------------------|-----------------------------------------------------------------|------------------------------|------------------|--------------------------------|------------------------------------------------------------|------------------------------|------------------------------|------------------|----|
| conversions ↓                                                |                                                                 |                              |                  |                                |                                                            |                              |                              |                  |    |
| NH <sub>4</sub> <sup>+</sup> to NO <sub>2</sub> <sup>-</sup> |                                                                 | -1                           | -5Y <sub>N</sub> | $-\frac{3-13Y_N}{2}$           | Y <sub>N</sub>                                             | 1-Y <sub>N</sub>             |                              |                  |    |
| NH <sub>4</sub> <sup>+</sup> to NO <sub>3</sub> <sup>-</sup> |                                                                 | -1                           | -5Y <sub>N</sub> | -2+7Y <sub>N</sub>             | Y <sub>N</sub>                                             | 1-Y <sub>N</sub>             |                              |                  |    |
| NH <sub>4</sub> <sup>+</sup> to N <sub>2</sub> O             |                                                                 | -2                           |                  | -2                             |                                                            |                              |                              | 1                |    |
| NH <sub>4</sub> <sup>+</sup> to NO                           |                                                                 | -4                           |                  | -5                             |                                                            |                              |                              |                  | 4  |
| bCOD conversion                                              | -1                                                              | -Y                           | 1-5Y             | $1+\frac{x}{4}-\frac{y}{2}-5Y$ | Y                                                          |                              |                              |                  |    |

yield of ammonium oxidizers  $Y_N = 0.0131 \text{ mol} \cdot \text{mol}^{-1}$  or  $0.15 \text{ gCOD} \cdot \text{gN}^{-1}$  (de Kreuk et al., 2007)

yield of heterotrophs  $Y = 0.1395 \text{ mol} \cdot \text{mol}^{-1}$  or  $0.67 \text{ gCOD} \cdot \text{gCOD}^{-1}$  (Henze et al., 2000)

a composition CH<sub>x</sub>O<sub>y</sub> = CH<sub>1.5</sub>O<sub>0.5</sub> was assumed, corresponding with a COD content of 36 gCOD/mole

Table A2. Other conversion factors

| # | factor           | value                                        | unit                    | description                                                                             | assumption                                                                                                                                 |
|---|------------------|----------------------------------------------|-------------------------|-----------------------------------------------------------------------------------------|--------------------------------------------------------------------------------------------------------------------------------------------|
| 1 | K <sub>aer</sub> | $\frac{10^{-6}}{R \cdot (273.15 + T_{aer})}$ | mol · ppm <sup>-1</sup> | conversion factor from ppm to mol                                                       | R = 8.2005 · 10 <sup>-5</sup> m <sup>3</sup> · atm · K <sup>-1</sup> · mol <sup>-1</sup><br>T <sub>aer</sub> = temperature of aeration air |
| 2 | K <sub>off</sub> | $\frac{10^{-6}}{R \cdot (273.15 + T_{off})}$ | mol · ppm <sup>-1</sup> | conversion factor from ppm to mol                                                       | T <sub>off</sub> = temperature of off- gas                                                                                                 |
| 3 |                  | 1.053                                        | mol · mol <sup>-1</sup> | conversion factor from ammonium-nitrogen (NH <sub>in</sub> ) to total Kjeldahl nitrogen | Mampaey et al. (2016)                                                                                                                      |

## Supplementary Information B: Raw and reconciled data set with off-gas data

### List of abbreviations

| Notation     | Description                                                               |
|--------------|---------------------------------------------------------------------------|
| var          | variable name                                                             |
| measured     | measured value                                                            |
| calculated   | calculated values from raw data                                           |
| reconciled   | reconciled value                                                          |
| std          | standard error of the mean                                                |
| %sd          | relative standard deviation                                               |
| $\Delta(\%)$ | ratio of reconciled value to measured value                               |
| i(%)         | Improvement of a variables                                                |
| M            | measured variable                                                         |
| U            | unmeasured variable                                                       |
| I            | identified variable (i.e., reconciled & checked by gross error detection) |

## Result for the whole data set

Table B0a. Data reconciliation (iteration = 3, convergence tolerance =  $3.4 \times 10^{-10}$ , CPU time = 0.7s)

| #  | Var                             | measured   | std  | sD%  | reconciled | std  | sD%  | $\Delta(\%)$ | i(%)  |   |   |
|----|---------------------------------|------------|------|------|------------|------|------|--------------|-------|---|---|
| 1  | CO <sub>2aer</sub>              | 591        | 10   | 1.70 | 591        | 10   | 1.70 | 100.00       | 0.00  | M | I |
| 2  | CO <sub>2off</sub>              | 22,052     | 88   | 0.40 | 22,052     | 88   | 0.40 | 100.00       | 0.00  | M | I |
| 3  | COD <sub>in</sub>               | 2.78       | 0.01 | 0.36 | 2.78       | 0.01 | 0.36 | 100.00       | 0.00  | M | I |
| 4  | N <sub>2</sub> O <sub>off</sub> | 345        | 3    | 0.88 | 345        | 3    | 0.88 | 100.00       | 0.00  | M | I |
| 5  | NH <sub>eff</sub>               | 43.8       | 2.2  | 5.00 | 44.0       | 2.0  | 4.59 | 100.61       | 7.69  | M | I |
| 6  | NH <sub>in</sub>                | 93.7       | 4.7  | 5.00 | 92.5       | 2.7  | 2.87 | 98.69        | 43.26 | M | I |
| 7  | NO <sub>2eff</sub>              | 48.1       | 2.4  | 5.00 | 48.5       | 2.2  | 4.51 | 100.66       | 9.12  | M | I |
| 8  | NO <sub>3eff</sub>              | 0.6        | 0.0  | 5.00 | 0.6        | 0.0  | 5.00 | 100.01       | 0.00  | M | I |
| 9  | NO <sub>off</sub>               | 26         | 0    | 0.54 | 26         | 0    | 0.54 | 100.00       | 0.00  | M | I |
| 10 | O <sub>2aer</sub>               | 209,653    | 94   | 0.04 | 209,653    | 94   | 0.04 | 100.00       | 0.00  | M | I |
| 11 | O <sub>2off</sub>               | 193,865    | 66   | 0.03 | 193,865    | 66   | 0.03 | 100.00       | 0.00  | M | I |
| 12 | Q <sub>aer</sub>                | 1,653      | 9    | 1    | 1,653      | 9    | 0.54 | 100.00       | 0.00  | M | I |
| 13 | Q <sub>in</sub>                 | 25.04      | 0.08 | 0.30 | 25.04      | 0.08 | 0.30 | 100.00       | 0.00  | M | I |
| #  | Var                             | calculated | std  | sD%  | reconciled | std  | sD%  | $\Delta(\%)$ | i(%)  |   |   |
| 14 | Q <sub>inf</sub>                | 1,434      | 153  | 11   | 1,454      | 140  | 9.63 | 101.39       | 8.63  | U | I |
| 15 | Q <sub>off</sub>                | 3,243      | 161  | 5    | 3,263      | 147  | 4.50 | 100.64       | 8.65  | U | I |
| 16 | (TIC:NH) <sub>in</sub>          | 1.14       | 0.08 | 7    | 1.17       | 0.04 | 3.48 | 101.99       | 49.91 | U | I |

Table B0b. Gross error detection

| Test                                                                                                               | Evaluation                                                                                                                                                                                                                                                                                                                                                                                                                                                                                                                                                                                                                                                                                                                                                                                                                                                                                                                                                                                                                                                                                                                                                                                                                                                                                                                                                                            |          |             |             |             |             |         |       |                    |      |      |      |      |   |                    |      |      |      |      |   |                   |   |      |   |      |   |                                 |      |      |      |      |   |                   |      |      |      |      |   |                  |      |      |      |      |   |                    |      |      |      |      |   |                   |      |      |      |      |   |                   |      |      |      |      |    |                   |      |      |      |      |    |                  |      |      |      |      |    |                 |   |      |   |      |
|--------------------------------------------------------------------------------------------------------------------|---------------------------------------------------------------------------------------------------------------------------------------------------------------------------------------------------------------------------------------------------------------------------------------------------------------------------------------------------------------------------------------------------------------------------------------------------------------------------------------------------------------------------------------------------------------------------------------------------------------------------------------------------------------------------------------------------------------------------------------------------------------------------------------------------------------------------------------------------------------------------------------------------------------------------------------------------------------------------------------------------------------------------------------------------------------------------------------------------------------------------------------------------------------------------------------------------------------------------------------------------------------------------------------------------------------------------------------------------------------------------------------|----------|-------------|-------------|-------------|-------------|---------|-------|--------------------|------|------|------|------|---|--------------------|------|------|------|------|---|-------------------|---|------|---|------|---|---------------------------------|------|------|------|------|---|-------------------|------|------|------|------|---|------------------|------|------|------|------|---|--------------------|------|------|------|------|---|-------------------|------|------|------|------|---|-------------------|------|------|------|------|----|-------------------|------|------|------|------|----|------------------|------|------|------|------|----|-----------------|---|------|---|------|
| Global test<br>System degree of redundancy = 1<br>t-statistic = 1.12, $\chi^2_{1-0.05,1} = 3.84$<br>p-value = 0.39 | no gross error detected                                                                                                                                                                                                                                                                                                                                                                                                                                                                                                                                                                                                                                                                                                                                                                                                                                                                                                                                                                                                                                                                                                                                                                                                                                                                                                                                                               |          |             |             |             |             |         |       |                    |      |      |      |      |   |                    |      |      |      |      |   |                   |   |      |   |      |   |                                 |      |      |      |      |   |                   |      |      |      |      |   |                  |      |      |      |      |   |                    |      |      |      |      |   |                   |      |      |      |      |   |                   |      |      |      |      |    |                   |      |      |      |      |    |                  |      |      |      |      |    |                 |   |      |   |      |
| Measurement test<br>Degree of freedom = 1<br>t-statistic <sub>max</sub> = 1.96<br>p-value <sub>min</sub> = 0.03    | no gross error detected                                                                                                                                                                                                                                                                                                                                                                                                                                                                                                                                                                                                                                                                                                                                                                                                                                                                                                                                                                                                                                                                                                                                                                                                                                                                                                                                                               |          |             |             |             |             |         |       |                    |      |      |      |      |   |                    |      |      |      |      |   |                   |   |      |   |      |   |                                 |      |      |      |      |   |                   |      |      |      |      |   |                  |      |      |      |      |   |                    |      |      |      |      |   |                   |      |      |      |      |   |                   |      |      |      |      |    |                   |      |      |      |      |    |                  |      |      |      |      |    |                 |   |      |   |      |
|                                                                                                                    | <table border="1"> <thead> <tr> <th>#</th> <th>Var</th> <th>residual</th> <th>error</th> <th>t-statistic</th> <th>p-value</th> </tr> </thead> <tbody> <tr><td>1</td><td>CO<sub>2aer</sub></td><td>0.00</td><td>0.00</td><td>0.32</td><td>0.37</td></tr> <tr><td>2</td><td>CO<sub>2off</sub></td><td>0.02</td><td>0.05</td><td>0.32</td><td>0.37</td></tr> <tr><td>3</td><td>COD<sub>in</sub></td><td>-</td><td>0.00</td><td>-</td><td>0.50</td></tr> <tr><td>4</td><td>N<sub>2</sub>O<sub>off</sub></td><td>0.00</td><td>0.01</td><td>0.32</td><td>0.37</td></tr> <tr><td>5</td><td>NH<sub>eff</sub></td><td>0.27</td><td>0.84</td><td>0.32</td><td>0.37</td></tr> <tr><td>6</td><td>NH<sub>in</sub></td><td>1.23</td><td>3.86</td><td>0.32</td><td>0.37</td></tr> <tr><td>7</td><td>NO<sub>2eff</sub></td><td>0.32</td><td>1.00</td><td>0.32</td><td>0.37</td></tr> <tr><td>8</td><td>NO<sub>off</sub></td><td>0.00</td><td>0.00</td><td>0.32</td><td>0.37</td></tr> <tr><td>9</td><td>O<sub>2aer</sub></td><td>0.00</td><td>0.00</td><td>0.32</td><td>0.37</td></tr> <tr><td>10</td><td>O<sub>2off</sub></td><td>0.08</td><td>0.26</td><td>0.32</td><td>0.37</td></tr> <tr><td>11</td><td>Q<sub>aer</sub></td><td>0.04</td><td>0.13</td><td>0.32</td><td>0.37</td></tr> <tr><td>12</td><td>Q<sub>in</sub></td><td>-</td><td>0.00</td><td>-</td><td>0.50</td></tr> </tbody> </table> | #        | Var         | residual    | error       | t-statistic | p-value | 1     | CO <sub>2aer</sub> | 0.00 | 0.00 | 0.32 | 0.37 | 2 | CO <sub>2off</sub> | 0.02 | 0.05 | 0.32 | 0.37 | 3 | COD <sub>in</sub> | - | 0.00 | - | 0.50 | 4 | N <sub>2</sub> O <sub>off</sub> | 0.00 | 0.01 | 0.32 | 0.37 | 5 | NH <sub>eff</sub> | 0.27 | 0.84 | 0.32 | 0.37 | 6 | NH <sub>in</sub> | 1.23 | 3.86 | 0.32 | 0.37 | 7 | NO <sub>2eff</sub> | 0.32 | 1.00 | 0.32 | 0.37 | 8 | NO <sub>off</sub> | 0.00 | 0.00 | 0.32 | 0.37 | 9 | O <sub>2aer</sub> | 0.00 | 0.00 | 0.32 | 0.37 | 10 | O <sub>2off</sub> | 0.08 | 0.26 | 0.32 | 0.37 | 11 | Q <sub>aer</sub> | 0.04 | 0.13 | 0.32 | 0.37 | 12 | Q <sub>in</sub> | - | 0.00 | - | 0.50 |
| #                                                                                                                  | Var                                                                                                                                                                                                                                                                                                                                                                                                                                                                                                                                                                                                                                                                                                                                                                                                                                                                                                                                                                                                                                                                                                                                                                                                                                                                                                                                                                                   | residual | error       | t-statistic | p-value     |             |         |       |                    |      |      |      |      |   |                    |      |      |      |      |   |                   |   |      |   |      |   |                                 |      |      |      |      |   |                   |      |      |      |      |   |                  |      |      |      |      |   |                    |      |      |      |      |   |                   |      |      |      |      |   |                   |      |      |      |      |    |                   |      |      |      |      |    |                  |      |      |      |      |    |                 |   |      |   |      |
| 1                                                                                                                  | CO <sub>2aer</sub>                                                                                                                                                                                                                                                                                                                                                                                                                                                                                                                                                                                                                                                                                                                                                                                                                                                                                                                                                                                                                                                                                                                                                                                                                                                                                                                                                                    | 0.00     | 0.00        | 0.32        | 0.37        |             |         |       |                    |      |      |      |      |   |                    |      |      |      |      |   |                   |   |      |   |      |   |                                 |      |      |      |      |   |                   |      |      |      |      |   |                  |      |      |      |      |   |                    |      |      |      |      |   |                   |      |      |      |      |   |                   |      |      |      |      |    |                   |      |      |      |      |    |                  |      |      |      |      |    |                 |   |      |   |      |
| 2                                                                                                                  | CO <sub>2off</sub>                                                                                                                                                                                                                                                                                                                                                                                                                                                                                                                                                                                                                                                                                                                                                                                                                                                                                                                                                                                                                                                                                                                                                                                                                                                                                                                                                                    | 0.02     | 0.05        | 0.32        | 0.37        |             |         |       |                    |      |      |      |      |   |                    |      |      |      |      |   |                   |   |      |   |      |   |                                 |      |      |      |      |   |                   |      |      |      |      |   |                  |      |      |      |      |   |                    |      |      |      |      |   |                   |      |      |      |      |   |                   |      |      |      |      |    |                   |      |      |      |      |    |                  |      |      |      |      |    |                 |   |      |   |      |
| 3                                                                                                                  | COD <sub>in</sub>                                                                                                                                                                                                                                                                                                                                                                                                                                                                                                                                                                                                                                                                                                                                                                                                                                                                                                                                                                                                                                                                                                                                                                                                                                                                                                                                                                     | -        | 0.00        | -           | 0.50        |             |         |       |                    |      |      |      |      |   |                    |      |      |      |      |   |                   |   |      |   |      |   |                                 |      |      |      |      |   |                   |      |      |      |      |   |                  |      |      |      |      |   |                    |      |      |      |      |   |                   |      |      |      |      |   |                   |      |      |      |      |    |                   |      |      |      |      |    |                  |      |      |      |      |    |                 |   |      |   |      |
| 4                                                                                                                  | N <sub>2</sub> O <sub>off</sub>                                                                                                                                                                                                                                                                                                                                                                                                                                                                                                                                                                                                                                                                                                                                                                                                                                                                                                                                                                                                                                                                                                                                                                                                                                                                                                                                                       | 0.00     | 0.01        | 0.32        | 0.37        |             |         |       |                    |      |      |      |      |   |                    |      |      |      |      |   |                   |   |      |   |      |   |                                 |      |      |      |      |   |                   |      |      |      |      |   |                  |      |      |      |      |   |                    |      |      |      |      |   |                   |      |      |      |      |   |                   |      |      |      |      |    |                   |      |      |      |      |    |                  |      |      |      |      |    |                 |   |      |   |      |
| 5                                                                                                                  | NH <sub>eff</sub>                                                                                                                                                                                                                                                                                                                                                                                                                                                                                                                                                                                                                                                                                                                                                                                                                                                                                                                                                                                                                                                                                                                                                                                                                                                                                                                                                                     | 0.27     | 0.84        | 0.32        | 0.37        |             |         |       |                    |      |      |      |      |   |                    |      |      |      |      |   |                   |   |      |   |      |   |                                 |      |      |      |      |   |                   |      |      |      |      |   |                  |      |      |      |      |   |                    |      |      |      |      |   |                   |      |      |      |      |   |                   |      |      |      |      |    |                   |      |      |      |      |    |                  |      |      |      |      |    |                 |   |      |   |      |
| 6                                                                                                                  | NH <sub>in</sub>                                                                                                                                                                                                                                                                                                                                                                                                                                                                                                                                                                                                                                                                                                                                                                                                                                                                                                                                                                                                                                                                                                                                                                                                                                                                                                                                                                      | 1.23     | 3.86        | 0.32        | 0.37        |             |         |       |                    |      |      |      |      |   |                    |      |      |      |      |   |                   |   |      |   |      |   |                                 |      |      |      |      |   |                   |      |      |      |      |   |                  |      |      |      |      |   |                    |      |      |      |      |   |                   |      |      |      |      |   |                   |      |      |      |      |    |                   |      |      |      |      |    |                  |      |      |      |      |    |                 |   |      |   |      |
| 7                                                                                                                  | NO <sub>2eff</sub>                                                                                                                                                                                                                                                                                                                                                                                                                                                                                                                                                                                                                                                                                                                                                                                                                                                                                                                                                                                                                                                                                                                                                                                                                                                                                                                                                                    | 0.32     | 1.00        | 0.32        | 0.37        |             |         |       |                    |      |      |      |      |   |                    |      |      |      |      |   |                   |   |      |   |      |   |                                 |      |      |      |      |   |                   |      |      |      |      |   |                  |      |      |      |      |   |                    |      |      |      |      |   |                   |      |      |      |      |   |                   |      |      |      |      |    |                   |      |      |      |      |    |                  |      |      |      |      |    |                 |   |      |   |      |
| 8                                                                                                                  | NO <sub>off</sub>                                                                                                                                                                                                                                                                                                                                                                                                                                                                                                                                                                                                                                                                                                                                                                                                                                                                                                                                                                                                                                                                                                                                                                                                                                                                                                                                                                     | 0.00     | 0.00        | 0.32        | 0.37        |             |         |       |                    |      |      |      |      |   |                    |      |      |      |      |   |                   |   |      |   |      |   |                                 |      |      |      |      |   |                   |      |      |      |      |   |                  |      |      |      |      |   |                    |      |      |      |      |   |                   |      |      |      |      |   |                   |      |      |      |      |    |                   |      |      |      |      |    |                  |      |      |      |      |    |                 |   |      |   |      |
| 9                                                                                                                  | O <sub>2aer</sub>                                                                                                                                                                                                                                                                                                                                                                                                                                                                                                                                                                                                                                                                                                                                                                                                                                                                                                                                                                                                                                                                                                                                                                                                                                                                                                                                                                     | 0.00     | 0.00        | 0.32        | 0.37        |             |         |       |                    |      |      |      |      |   |                    |      |      |      |      |   |                   |   |      |   |      |   |                                 |      |      |      |      |   |                   |      |      |      |      |   |                  |      |      |      |      |   |                    |      |      |      |      |   |                   |      |      |      |      |   |                   |      |      |      |      |    |                   |      |      |      |      |    |                  |      |      |      |      |    |                 |   |      |   |      |
| 10                                                                                                                 | O <sub>2off</sub>                                                                                                                                                                                                                                                                                                                                                                                                                                                                                                                                                                                                                                                                                                                                                                                                                                                                                                                                                                                                                                                                                                                                                                                                                                                                                                                                                                     | 0.08     | 0.26        | 0.32        | 0.37        |             |         |       |                    |      |      |      |      |   |                    |      |      |      |      |   |                   |   |      |   |      |   |                                 |      |      |      |      |   |                   |      |      |      |      |   |                  |      |      |      |      |   |                    |      |      |      |      |   |                   |      |      |      |      |   |                   |      |      |      |      |    |                   |      |      |      |      |    |                  |      |      |      |      |    |                 |   |      |   |      |
| 11                                                                                                                 | Q <sub>aer</sub>                                                                                                                                                                                                                                                                                                                                                                                                                                                                                                                                                                                                                                                                                                                                                                                                                                                                                                                                                                                                                                                                                                                                                                                                                                                                                                                                                                      | 0.04     | 0.13        | 0.32        | 0.37        |             |         |       |                    |      |      |      |      |   |                    |      |      |      |      |   |                   |   |      |   |      |   |                                 |      |      |      |      |   |                   |      |      |      |      |   |                  |      |      |      |      |   |                    |      |      |      |      |   |                   |      |      |      |      |   |                   |      |      |      |      |    |                   |      |      |      |      |    |                  |      |      |      |      |    |                 |   |      |   |      |
| 12                                                                                                                 | Q <sub>in</sub>                                                                                                                                                                                                                                                                                                                                                                                                                                                                                                                                                                                                                                                                                                                                                                                                                                                                                                                                                                                                                                                                                                                                                                                                                                                                                                                                                                       | -        | 0.00        | -           | 0.50        |             |         |       |                    |      |      |      |      |   |                    |      |      |      |      |   |                   |   |      |   |      |   |                                 |      |      |      |      |   |                   |      |      |      |      |   |                  |      |      |      |      |   |                    |      |      |      |      |   |                   |      |      |      |      |   |                   |      |      |      |      |    |                   |      |      |      |      |    |                  |      |      |      |      |    |                 |   |      |   |      |
| Nodal test<br>Degree of freedom = 1<br>t-statistic <sub>max</sub> = 1.96<br>p-value <sub>min</sub> = 0.03          | no gross error detected                                                                                                                                                                                                                                                                                                                                                                                                                                                                                                                                                                                                                                                                                                                                                                                                                                                                                                                                                                                                                                                                                                                                                                                                                                                                                                                                                               |          |             |             |             |             |         |       |                    |      |      |      |      |   |                    |      |      |      |      |   |                   |   |      |   |      |   |                                 |      |      |      |      |   |                   |      |      |      |      |   |                  |      |      |      |      |   |                    |      |      |      |      |   |                   |      |      |      |      |   |                   |      |      |      |      |    |                   |      |      |      |      |    |                  |      |      |      |      |    |                 |   |      |   |      |
|                                                                                                                    | <table border="1"> <thead> <tr> <th>#</th> <th>misbalance</th> <th>error</th> <th>t-statistic</th> <th>p-value</th> </tr> </thead> <tbody> <tr><td>1</td><td>1,791</td><td>5,617</td><td>0.32</td><td>0.37</td></tr> </tbody> </table>                                                                                                                                                                                                                                                                                                                                                                                                                                                                                                                                                                                                                                                                                                                                                                                                                                                                                                                                                                                                                                                                                                                                                | #        | misbalance  | error       | t-statistic | p-value     | 1       | 1,791 | 5,617              | 0.32 | 0.37 |      |      |   |                    |      |      |      |      |   |                   |   |      |   |      |   |                                 |      |      |      |      |   |                   |      |      |      |      |   |                  |      |      |      |      |   |                    |      |      |      |      |   |                   |      |      |      |      |   |                   |      |      |      |      |    |                   |      |      |      |      |    |                  |      |      |      |      |    |                 |   |      |   |      |
| #                                                                                                                  | misbalance                                                                                                                                                                                                                                                                                                                                                                                                                                                                                                                                                                                                                                                                                                                                                                                                                                                                                                                                                                                                                                                                                                                                                                                                                                                                                                                                                                            | error    | t-statistic | p-value     |             |             |         |       |                    |      |      |      |      |   |                    |      |      |      |      |   |                   |   |      |   |      |   |                                 |      |      |      |      |   |                   |      |      |      |      |   |                  |      |      |      |      |   |                    |      |      |      |      |   |                   |      |      |      |      |   |                   |      |      |      |      |    |                   |      |      |      |      |    |                  |      |      |      |      |    |                 |   |      |   |      |
| 1                                                                                                                  | 1,791                                                                                                                                                                                                                                                                                                                                                                                                                                                                                                                                                                                                                                                                                                                                                                                                                                                                                                                                                                                                                                                                                                                                                                                                                                                                                                                                                                                 | 5,617    | 0.32        | 0.37        |             |             |         |       |                    |      |      |      |      |   |                    |      |      |      |      |   |                   |   |      |   |      |   |                                 |      |      |      |      |   |                   |      |      |      |      |   |                  |      |      |      |      |   |                    |      |      |      |      |   |                   |      |      |      |      |   |                   |      |      |      |      |    |                   |      |      |      |      |    |                  |      |      |      |      |    |                 |   |      |   |      |

## Results for S1

Table B1a. Data reconciliation (iteration = 3, convergence tolerance =  $3.8 \times 10^{-09}$ , CPU time = 0.7s)

| #  | Var                             | measured   | std  | sD%  | reconciled | std  | sD%   | $\Delta(\%)$ | i(%)  |   |   |
|----|---------------------------------|------------|------|------|------------|------|-------|--------------|-------|---|---|
| 1  | CO <sub>2aer</sub>              | 611        | 52   | 8.54 | 611        | 52   | 8.54  | 100.00       | 0.00  | M | I |
| 2  | CO <sub>2off</sub>              | 30,052     | 157  | 0.52 | 30,052     | 157  | 0.52  | 100.00       | 0.00  | M | I |
| 3  | COD <sub>in</sub>               | 2.78       | 0.01 | 0.36 | 2.78       | 0.01 | 0.36  | 100.00       | 0.00  | M | I |
| 4  | N <sub>2</sub> O <sub>off</sub> | 264        | 6    | 2.23 | 264        | 6    | 2.23  | 100.00       | 0.00  | M | I |
| 5  | NH <sub>eff</sub>               | 39.7       | 2.0  | 5.00 | 40.1       | 1.8  | 4.60  | 100.95       | 7.06  | M | I |
| 6  | NH <sub>in</sub>                | 88.9       | 4.4  | 5.00 | 87.0       | 2.5  | 2.88  | 97.87        | 43.58 | M | I |
| 7  | NO <sub>2eff</sub>              | 47.3       | 2.4  | 5.00 | 47.8       | 2.1  | 4.47  | 101.10       | 9.56  | M | I |
| 8  | NO <sub>3eff</sub>              | 0.4        | 0.0  | 5.00 | 0.4        | 0.0  | 5.00  | 100.01       | 0.00  | M | I |
| 9  | NO <sub>off</sub>               | 36         | 0    | 0.70 | 36         | 0    | 0.70  | 100.00       | 0.00  | M | I |
| 10 | O <sub>2aer</sub>               | 209,886    | 38   | 0.02 | 209,886    | 38   | 0.02  | 100.00       | 0.00  | M | I |
| 11 | O <sub>2off</sub>               | 188,072    | 101  | 0.05 | 188,072    | 101  | 0.05  | 100.00       | 0.00  | M | I |
| 12 | Q <sub>aer</sub>                | 2,119      | 23   | 1    | 2,119      | 23   | 1.10  | 100.00       | 0.00  | M | I |
| 13 | Q <sub>in</sub>                 | 34.61      | 0.15 | 0.42 | 34.61      | 0.15 | 0.42  | 100.00       | 0.00  | M | I |
| #  | Var                             | calculated | std  | sD%  | reconciled | std  | sD%   | $\Delta(\%)$ | i(%)  |   |   |
| 14 | Q <sub>inf</sub>                | 852        | 148  | 17   | 884        | 135  | 15.26 | 103.73       | 9.01  | U | I |
| 15 | Q <sub>off</sub>                | 3,130      | 154  | 5    | 3,163      | 140  | 4.43  | 101.07       | 9.24  | U | I |
| 16 | (TIC:NH) <sub>in</sub>          | 1.15       | 0.08 | 7    | 1.19       | 0.04 | 3.33  | 103.28       | 51.34 | U | I |

Table B2b. Gross error detection

| Test                                           | Evaluation                                                                                                                                                                                                                                                                                                                                                                                                                                                                                                                                                                                                                                                                                                                                                                                                                                                                                                                                                                                                                                                                                                                                                                                                                                                                                                                                                                                                                                                                |          |             |             |             |             |         |       |                    |      |      |      |      |   |                    |      |      |      |      |   |                   |   |      |   |      |   |                                 |      |      |      |      |   |                   |      |      |      |      |   |                  |      |      |      |      |   |                    |      |      |      |      |   |                   |      |      |      |      |   |                   |      |      |      |      |    |                   |      |      |      |      |    |                  |      |      |      |      |    |                 |   |      |   |      |
|------------------------------------------------|---------------------------------------------------------------------------------------------------------------------------------------------------------------------------------------------------------------------------------------------------------------------------------------------------------------------------------------------------------------------------------------------------------------------------------------------------------------------------------------------------------------------------------------------------------------------------------------------------------------------------------------------------------------------------------------------------------------------------------------------------------------------------------------------------------------------------------------------------------------------------------------------------------------------------------------------------------------------------------------------------------------------------------------------------------------------------------------------------------------------------------------------------------------------------------------------------------------------------------------------------------------------------------------------------------------------------------------------------------------------------------------------------------------------------------------------------------------------------|----------|-------------|-------------|-------------|-------------|---------|-------|--------------------|------|------|------|------|---|--------------------|------|------|------|------|---|-------------------|---|------|---|------|---|---------------------------------|------|------|------|------|---|-------------------|------|------|------|------|---|------------------|------|------|------|------|---|--------------------|------|------|------|------|---|-------------------|------|------|------|------|---|-------------------|------|------|------|------|----|-------------------|------|------|------|------|----|------------------|------|------|------|------|----|-----------------|---|------|---|------|
| Global test                                    | no gross error detected                                                                                                                                                                                                                                                                                                                                                                                                                                                                                                                                                                                                                                                                                                                                                                                                                                                                                                                                                                                                                                                                                                                                                                                                                                                                                                                                                                                                                                                   |          |             |             |             |             |         |       |                    |      |      |      |      |   |                    |      |      |      |      |   |                   |   |      |   |      |   |                                 |      |      |      |      |   |                   |      |      |      |      |   |                  |      |      |      |      |   |                    |      |      |      |      |   |                   |      |      |      |      |   |                   |      |      |      |      |    |                   |      |      |      |      |    |                  |      |      |      |      |    |                 |   |      |   |      |
| System degree of redundancy = 1                |                                                                                                                                                                                                                                                                                                                                                                                                                                                                                                                                                                                                                                                                                                                                                                                                                                                                                                                                                                                                                                                                                                                                                                                                                                                                                                                                                                                                                                                                           |          |             |             |             |             |         |       |                    |      |      |      |      |   |                    |      |      |      |      |   |                   |   |      |   |      |   |                                 |      |      |      |      |   |                   |      |      |      |      |   |                  |      |      |      |      |   |                    |      |      |      |      |   |                   |      |      |      |      |   |                   |      |      |      |      |    |                   |      |      |      |      |    |                  |      |      |      |      |    |                 |   |      |   |      |
| t-statistic = 2.92, $\chi^2_{1-0.05,1} = 3.84$ |                                                                                                                                                                                                                                                                                                                                                                                                                                                                                                                                                                                                                                                                                                                                                                                                                                                                                                                                                                                                                                                                                                                                                                                                                                                                                                                                                                                                                                                                           |          |             |             |             |             |         |       |                    |      |      |      |      |   |                    |      |      |      |      |   |                   |   |      |   |      |   |                                 |      |      |      |      |   |                   |      |      |      |      |   |                  |      |      |      |      |   |                    |      |      |      |      |   |                   |      |      |      |      |   |                   |      |      |      |      |    |                   |      |      |      |      |    |                  |      |      |      |      |    |                 |   |      |   |      |
| p-value = 0.09                                 |                                                                                                                                                                                                                                                                                                                                                                                                                                                                                                                                                                                                                                                                                                                                                                                                                                                                                                                                                                                                                                                                                                                                                                                                                                                                                                                                                                                                                                                                           |          |             |             |             |             |         |       |                    |      |      |      |      |   |                    |      |      |      |      |   |                   |   |      |   |      |   |                                 |      |      |      |      |   |                   |      |      |      |      |   |                  |      |      |      |      |   |                    |      |      |      |      |   |                   |      |      |      |      |   |                   |      |      |      |      |    |                   |      |      |      |      |    |                  |      |      |      |      |    |                 |   |      |   |      |
| Measurement test                               | no gross error detected                                                                                                                                                                                                                                                                                                                                                                                                                                                                                                                                                                                                                                                                                                                                                                                                                                                                                                                                                                                                                                                                                                                                                                                                                                                                                                                                                                                                                                                   |          |             |             |             |             |         |       |                    |      |      |      |      |   |                    |      |      |      |      |   |                   |   |      |   |      |   |                                 |      |      |      |      |   |                   |      |      |      |      |   |                  |      |      |      |      |   |                    |      |      |      |      |   |                   |      |      |      |      |   |                   |      |      |      |      |    |                   |      |      |      |      |    |                  |      |      |      |      |    |                 |   |      |   |      |
| Degree of freedom = 1                          |                                                                                                                                                                                                                                                                                                                                                                                                                                                                                                                                                                                                                                                                                                                                                                                                                                                                                                                                                                                                                                                                                                                                                                                                                                                                                                                                                                                                                                                                           |          |             |             |             |             |         |       |                    |      |      |      |      |   |                    |      |      |      |      |   |                   |   |      |   |      |   |                                 |      |      |      |      |   |                   |      |      |      |      |   |                  |      |      |      |      |   |                    |      |      |      |      |   |                   |      |      |      |      |   |                   |      |      |      |      |    |                   |      |      |      |      |    |                  |      |      |      |      |    |                 |   |      |   |      |
| t-statistic <sub>max</sub> = 1.96              |                                                                                                                                                                                                                                                                                                                                                                                                                                                                                                                                                                                                                                                                                                                                                                                                                                                                                                                                                                                                                                                                                                                                                                                                                                                                                                                                                                                                                                                                           |          |             |             |             |             |         |       |                    |      |      |      |      |   |                    |      |      |      |      |   |                   |   |      |   |      |   |                                 |      |      |      |      |   |                   |      |      |      |      |   |                  |      |      |      |      |   |                    |      |      |      |      |   |                   |      |      |      |      |   |                   |      |      |      |      |    |                   |      |      |      |      |    |                  |      |      |      |      |    |                 |   |      |   |      |
| p-value <sub>min</sub> = 0.03                  |                                                                                                                                                                                                                                                                                                                                                                                                                                                                                                                                                                                                                                                                                                                                                                                                                                                                                                                                                                                                                                                                                                                                                                                                                                                                                                                                                                                                                                                                           |          |             |             |             |             |         |       |                    |      |      |      |      |   |                    |      |      |      |      |   |                   |   |      |   |      |   |                                 |      |      |      |      |   |                   |      |      |      |      |   |                  |      |      |      |      |   |                    |      |      |      |      |   |                   |      |      |      |      |   |                   |      |      |      |      |    |                   |      |      |      |      |    |                  |      |      |      |      |    |                 |   |      |   |      |
|                                                | <table border="1"> <thead> <tr> <th>#</th> <th>Var</th> <th>residual</th> <th>error</th> <th>t-statistic</th> <th>p-value</th> </tr> </thead> <tbody> <tr> <td>1</td> <td>CO<sub>2aer</sub></td> <td>0.00</td> <td>0.01</td> <td>0.52</td> <td>0.30</td> </tr> <tr> <td>2</td> <td>CO<sub>2off</sub></td> <td>0.03</td> <td>0.06</td> <td>0.52</td> <td>0.30</td> </tr> <tr> <td>3</td> <td>COD<sub>in</sub></td> <td>-</td> <td>0.00</td> <td>-</td> <td>0.50</td> </tr> <tr> <td>4</td> <td>N<sub>2</sub>O<sub>off</sub></td> <td>0.01</td> <td>0.02</td> <td>0.52</td> <td>0.30</td> </tr> <tr> <td>5</td> <td>NH<sub>eff</sub></td> <td>0.38</td> <td>0.73</td> <td>0.52</td> <td>0.30</td> </tr> <tr> <td>6</td> <td>NH<sub>in</sub></td> <td>1.89</td> <td>3.67</td> <td>0.52</td> <td>0.30</td> </tr> <tr> <td>7</td> <td>NO<sub>2eff</sub></td> <td>0.52</td> <td>1.01</td> <td>0.52</td> <td>0.30</td> </tr> <tr> <td>8</td> <td>NO<sub>off</sub></td> <td>0.00</td> <td>0.00</td> <td>0.52</td> <td>0.30</td> </tr> <tr> <td>9</td> <td>O<sub>2aer</sub></td> <td>0.00</td> <td>0.00</td> <td>0.52</td> <td>0.30</td> </tr> <tr> <td>10</td> <td>O<sub>2off</sub></td> <td>0.01</td> <td>0.02</td> <td>0.52</td> <td>0.30</td> </tr> <tr> <td>11</td> <td>Q<sub>aer</sub></td> <td>0.07</td> <td>0.13</td> <td>0.52</td> <td>0.30</td> </tr> <tr> <td>12</td> <td>Q<sub>in</sub></td> <td>-</td> <td>0.00</td> <td>-</td> <td>0.50</td> </tr> </tbody> </table> | #        | Var         | residual    | error       | t-statistic | p-value | 1     | CO <sub>2aer</sub> | 0.00 | 0.01 | 0.52 | 0.30 | 2 | CO <sub>2off</sub> | 0.03 | 0.06 | 0.52 | 0.30 | 3 | COD <sub>in</sub> | - | 0.00 | - | 0.50 | 4 | N <sub>2</sub> O <sub>off</sub> | 0.01 | 0.02 | 0.52 | 0.30 | 5 | NH <sub>eff</sub> | 0.38 | 0.73 | 0.52 | 0.30 | 6 | NH <sub>in</sub> | 1.89 | 3.67 | 0.52 | 0.30 | 7 | NO <sub>2eff</sub> | 0.52 | 1.01 | 0.52 | 0.30 | 8 | NO <sub>off</sub> | 0.00 | 0.00 | 0.52 | 0.30 | 9 | O <sub>2aer</sub> | 0.00 | 0.00 | 0.52 | 0.30 | 10 | O <sub>2off</sub> | 0.01 | 0.02 | 0.52 | 0.30 | 11 | Q <sub>aer</sub> | 0.07 | 0.13 | 0.52 | 0.30 | 12 | Q <sub>in</sub> | - | 0.00 | - | 0.50 |
| #                                              | Var                                                                                                                                                                                                                                                                                                                                                                                                                                                                                                                                                                                                                                                                                                                                                                                                                                                                                                                                                                                                                                                                                                                                                                                                                                                                                                                                                                                                                                                                       | residual | error       | t-statistic | p-value     |             |         |       |                    |      |      |      |      |   |                    |      |      |      |      |   |                   |   |      |   |      |   |                                 |      |      |      |      |   |                   |      |      |      |      |   |                  |      |      |      |      |   |                    |      |      |      |      |   |                   |      |      |      |      |   |                   |      |      |      |      |    |                   |      |      |      |      |    |                  |      |      |      |      |    |                 |   |      |   |      |
| 1                                              | CO <sub>2aer</sub>                                                                                                                                                                                                                                                                                                                                                                                                                                                                                                                                                                                                                                                                                                                                                                                                                                                                                                                                                                                                                                                                                                                                                                                                                                                                                                                                                                                                                                                        | 0.00     | 0.01        | 0.52        | 0.30        |             |         |       |                    |      |      |      |      |   |                    |      |      |      |      |   |                   |   |      |   |      |   |                                 |      |      |      |      |   |                   |      |      |      |      |   |                  |      |      |      |      |   |                    |      |      |      |      |   |                   |      |      |      |      |   |                   |      |      |      |      |    |                   |      |      |      |      |    |                  |      |      |      |      |    |                 |   |      |   |      |
| 2                                              | CO <sub>2off</sub>                                                                                                                                                                                                                                                                                                                                                                                                                                                                                                                                                                                                                                                                                                                                                                                                                                                                                                                                                                                                                                                                                                                                                                                                                                                                                                                                                                                                                                                        | 0.03     | 0.06        | 0.52        | 0.30        |             |         |       |                    |      |      |      |      |   |                    |      |      |      |      |   |                   |   |      |   |      |   |                                 |      |      |      |      |   |                   |      |      |      |      |   |                  |      |      |      |      |   |                    |      |      |      |      |   |                   |      |      |      |      |   |                   |      |      |      |      |    |                   |      |      |      |      |    |                  |      |      |      |      |    |                 |   |      |   |      |
| 3                                              | COD <sub>in</sub>                                                                                                                                                                                                                                                                                                                                                                                                                                                                                                                                                                                                                                                                                                                                                                                                                                                                                                                                                                                                                                                                                                                                                                                                                                                                                                                                                                                                                                                         | -        | 0.00        | -           | 0.50        |             |         |       |                    |      |      |      |      |   |                    |      |      |      |      |   |                   |   |      |   |      |   |                                 |      |      |      |      |   |                   |      |      |      |      |   |                  |      |      |      |      |   |                    |      |      |      |      |   |                   |      |      |      |      |   |                   |      |      |      |      |    |                   |      |      |      |      |    |                  |      |      |      |      |    |                 |   |      |   |      |
| 4                                              | N <sub>2</sub> O <sub>off</sub>                                                                                                                                                                                                                                                                                                                                                                                                                                                                                                                                                                                                                                                                                                                                                                                                                                                                                                                                                                                                                                                                                                                                                                                                                                                                                                                                                                                                                                           | 0.01     | 0.02        | 0.52        | 0.30        |             |         |       |                    |      |      |      |      |   |                    |      |      |      |      |   |                   |   |      |   |      |   |                                 |      |      |      |      |   |                   |      |      |      |      |   |                  |      |      |      |      |   |                    |      |      |      |      |   |                   |      |      |      |      |   |                   |      |      |      |      |    |                   |      |      |      |      |    |                  |      |      |      |      |    |                 |   |      |   |      |
| 5                                              | NH <sub>eff</sub>                                                                                                                                                                                                                                                                                                                                                                                                                                                                                                                                                                                                                                                                                                                                                                                                                                                                                                                                                                                                                                                                                                                                                                                                                                                                                                                                                                                                                                                         | 0.38     | 0.73        | 0.52        | 0.30        |             |         |       |                    |      |      |      |      |   |                    |      |      |      |      |   |                   |   |      |   |      |   |                                 |      |      |      |      |   |                   |      |      |      |      |   |                  |      |      |      |      |   |                    |      |      |      |      |   |                   |      |      |      |      |   |                   |      |      |      |      |    |                   |      |      |      |      |    |                  |      |      |      |      |    |                 |   |      |   |      |
| 6                                              | NH <sub>in</sub>                                                                                                                                                                                                                                                                                                                                                                                                                                                                                                                                                                                                                                                                                                                                                                                                                                                                                                                                                                                                                                                                                                                                                                                                                                                                                                                                                                                                                                                          | 1.89     | 3.67        | 0.52        | 0.30        |             |         |       |                    |      |      |      |      |   |                    |      |      |      |      |   |                   |   |      |   |      |   |                                 |      |      |      |      |   |                   |      |      |      |      |   |                  |      |      |      |      |   |                    |      |      |      |      |   |                   |      |      |      |      |   |                   |      |      |      |      |    |                   |      |      |      |      |    |                  |      |      |      |      |    |                 |   |      |   |      |
| 7                                              | NO <sub>2eff</sub>                                                                                                                                                                                                                                                                                                                                                                                                                                                                                                                                                                                                                                                                                                                                                                                                                                                                                                                                                                                                                                                                                                                                                                                                                                                                                                                                                                                                                                                        | 0.52     | 1.01        | 0.52        | 0.30        |             |         |       |                    |      |      |      |      |   |                    |      |      |      |      |   |                   |   |      |   |      |   |                                 |      |      |      |      |   |                   |      |      |      |      |   |                  |      |      |      |      |   |                    |      |      |      |      |   |                   |      |      |      |      |   |                   |      |      |      |      |    |                   |      |      |      |      |    |                  |      |      |      |      |    |                 |   |      |   |      |
| 8                                              | NO <sub>off</sub>                                                                                                                                                                                                                                                                                                                                                                                                                                                                                                                                                                                                                                                                                                                                                                                                                                                                                                                                                                                                                                                                                                                                                                                                                                                                                                                                                                                                                                                         | 0.00     | 0.00        | 0.52        | 0.30        |             |         |       |                    |      |      |      |      |   |                    |      |      |      |      |   |                   |   |      |   |      |   |                                 |      |      |      |      |   |                   |      |      |      |      |   |                  |      |      |      |      |   |                    |      |      |      |      |   |                   |      |      |      |      |   |                   |      |      |      |      |    |                   |      |      |      |      |    |                  |      |      |      |      |    |                 |   |      |   |      |
| 9                                              | O <sub>2aer</sub>                                                                                                                                                                                                                                                                                                                                                                                                                                                                                                                                                                                                                                                                                                                                                                                                                                                                                                                                                                                                                                                                                                                                                                                                                                                                                                                                                                                                                                                         | 0.00     | 0.00        | 0.52        | 0.30        |             |         |       |                    |      |      |      |      |   |                    |      |      |      |      |   |                   |   |      |   |      |   |                                 |      |      |      |      |   |                   |      |      |      |      |   |                  |      |      |      |      |   |                    |      |      |      |      |   |                   |      |      |      |      |   |                   |      |      |      |      |    |                   |      |      |      |      |    |                  |      |      |      |      |    |                 |   |      |   |      |
| 10                                             | O <sub>2off</sub>                                                                                                                                                                                                                                                                                                                                                                                                                                                                                                                                                                                                                                                                                                                                                                                                                                                                                                                                                                                                                                                                                                                                                                                                                                                                                                                                                                                                                                                         | 0.01     | 0.02        | 0.52        | 0.30        |             |         |       |                    |      |      |      |      |   |                    |      |      |      |      |   |                   |   |      |   |      |   |                                 |      |      |      |      |   |                   |      |      |      |      |   |                  |      |      |      |      |   |                    |      |      |      |      |   |                   |      |      |      |      |   |                   |      |      |      |      |    |                   |      |      |      |      |    |                  |      |      |      |      |    |                 |   |      |   |      |
| 11                                             | Q <sub>aer</sub>                                                                                                                                                                                                                                                                                                                                                                                                                                                                                                                                                                                                                                                                                                                                                                                                                                                                                                                                                                                                                                                                                                                                                                                                                                                                                                                                                                                                                                                          | 0.07     | 0.13        | 0.52        | 0.30        |             |         |       |                    |      |      |      |      |   |                    |      |      |      |      |   |                   |   |      |   |      |   |                                 |      |      |      |      |   |                   |      |      |      |      |   |                  |      |      |      |      |   |                    |      |      |      |      |   |                   |      |      |      |      |   |                   |      |      |      |      |    |                   |      |      |      |      |    |                  |      |      |      |      |    |                 |   |      |   |      |
| 12                                             | Q <sub>in</sub>                                                                                                                                                                                                                                                                                                                                                                                                                                                                                                                                                                                                                                                                                                                                                                                                                                                                                                                                                                                                                                                                                                                                                                                                                                                                                                                                                                                                                                                           | -        | 0.00        | -           | 0.50        |             |         |       |                    |      |      |      |      |   |                    |      |      |      |      |   |                   |   |      |   |      |   |                                 |      |      |      |      |   |                   |      |      |      |      |   |                  |      |      |      |      |   |                    |      |      |      |      |   |                   |      |      |      |      |   |                   |      |      |      |      |    |                   |      |      |      |      |    |                  |      |      |      |      |    |                 |   |      |   |      |
| Nodal test                                     | no gross error detected                                                                                                                                                                                                                                                                                                                                                                                                                                                                                                                                                                                                                                                                                                                                                                                                                                                                                                                                                                                                                                                                                                                                                                                                                                                                                                                                                                                                                                                   |          |             |             |             |             |         |       |                    |      |      |      |      |   |                    |      |      |      |      |   |                   |   |      |   |      |   |                                 |      |      |      |      |   |                   |      |      |      |      |   |                  |      |      |      |      |   |                    |      |      |      |      |   |                   |      |      |      |      |   |                   |      |      |      |      |    |                   |      |      |      |      |    |                  |      |      |      |      |    |                 |   |      |   |      |
| Degree of freedom = 1                          |                                                                                                                                                                                                                                                                                                                                                                                                                                                                                                                                                                                                                                                                                                                                                                                                                                                                                                                                                                                                                                                                                                                                                                                                                                                                                                                                                                                                                                                                           |          |             |             |             |             |         |       |                    |      |      |      |      |   |                    |      |      |      |      |   |                   |   |      |   |      |   |                                 |      |      |      |      |   |                   |      |      |      |      |   |                  |      |      |      |      |   |                    |      |      |      |      |   |                   |      |      |      |      |   |                   |      |      |      |      |    |                   |      |      |      |      |    |                  |      |      |      |      |    |                 |   |      |   |      |
| t-statistic <sub>max</sub> = 1.96              |                                                                                                                                                                                                                                                                                                                                                                                                                                                                                                                                                                                                                                                                                                                                                                                                                                                                                                                                                                                                                                                                                                                                                                                                                                                                                                                                                                                                                                                                           |          |             |             |             |             |         |       |                    |      |      |      |      |   |                    |      |      |      |      |   |                   |   |      |   |      |   |                                 |      |      |      |      |   |                   |      |      |      |      |   |                  |      |      |      |      |   |                    |      |      |      |      |   |                   |      |      |      |      |   |                   |      |      |      |      |    |                   |      |      |      |      |    |                  |      |      |      |      |    |                 |   |      |   |      |
| p-value <sub>min</sub> = 0.03                  |                                                                                                                                                                                                                                                                                                                                                                                                                                                                                                                                                                                                                                                                                                                                                                                                                                                                                                                                                                                                                                                                                                                                                                                                                                                                                                                                                                                                                                                                           |          |             |             |             |             |         |       |                    |      |      |      |      |   |                    |      |      |      |      |   |                   |   |      |   |      |   |                                 |      |      |      |      |   |                   |      |      |      |      |   |                  |      |      |      |      |   |                    |      |      |      |      |   |                   |      |      |      |      |   |                   |      |      |      |      |    |                   |      |      |      |      |    |                  |      |      |      |      |    |                 |   |      |   |      |
|                                                | <table border="1"> <thead> <tr> <th>#</th> <th>misbalance</th> <th>error</th> <th>t-statistic</th> <th>p-value</th> </tr> </thead> <tbody> <tr> <td>1</td> <td>6,563</td> <td>12,733</td> <td>0.52</td> <td>0.30</td> </tr> </tbody> </table>                                                                                                                                                                                                                                                                                                                                                                                                                                                                                                                                                                                                                                                                                                                                                                                                                                                                                                                                                                                                                                                                                                                                                                                                                             | #        | misbalance  | error       | t-statistic | p-value     | 1       | 6,563 | 12,733             | 0.52 | 0.30 |      |      |   |                    |      |      |      |      |   |                   |   |      |   |      |   |                                 |      |      |      |      |   |                   |      |      |      |      |   |                  |      |      |      |      |   |                    |      |      |      |      |   |                   |      |      |      |      |   |                   |      |      |      |      |    |                   |      |      |      |      |    |                  |      |      |      |      |    |                 |   |      |   |      |
| #                                              | misbalance                                                                                                                                                                                                                                                                                                                                                                                                                                                                                                                                                                                                                                                                                                                                                                                                                                                                                                                                                                                                                                                                                                                                                                                                                                                                                                                                                                                                                                                                | error    | t-statistic | p-value     |             |             |         |       |                    |      |      |      |      |   |                    |      |      |      |      |   |                   |   |      |   |      |   |                                 |      |      |      |      |   |                   |      |      |      |      |   |                  |      |      |      |      |   |                    |      |      |      |      |   |                   |      |      |      |      |   |                   |      |      |      |      |    |                   |      |      |      |      |    |                  |      |      |      |      |    |                 |   |      |   |      |
| 1                                              | 6,563                                                                                                                                                                                                                                                                                                                                                                                                                                                                                                                                                                                                                                                                                                                                                                                                                                                                                                                                                                                                                                                                                                                                                                                                                                                                                                                                                                                                                                                                     | 12,733   | 0.52        | 0.30        |             |             |         |       |                    |      |      |      |      |   |                    |      |      |      |      |   |                   |   |      |   |      |   |                                 |      |      |      |      |   |                   |      |      |      |      |   |                  |      |      |      |      |   |                    |      |      |      |      |   |                   |      |      |      |      |   |                   |      |      |      |      |    |                   |      |      |      |      |    |                  |      |      |      |      |    |                 |   |      |   |      |

## Results for S2

Table B2a. Data reconciliation (iteration = 3, convergence tolerance =  $2.3 \times 10^{-07}$ , CPU time = 0.8s)

| #  | Var                             | measured   | std  | sD%  | reconciled | std  | sD%   | $\Delta(\%)$ | i(%)  |   |   |
|----|---------------------------------|------------|------|------|------------|------|-------|--------------|-------|---|---|
| 1  | CO <sub>2aer</sub>              | 550        | 12   | 2.27 | 550        | 12   | 2.27  | 100.00       | 0.00  | M | I |
| 2  | CO <sub>2off</sub>              | 30,496     | 159  | 0.52 | 30,496     | 159  | 0.52  | 100.00       | 0.00  | M | I |
| 3  | COD <sub>in</sub>               | 2.78       | 0.01 | 0.36 | 2.78       | 0.01 | 0.36  | 100.00       | 0.00  | M | I |
| 4  | N <sub>2</sub> O <sub>off</sub> | 296        | 9    | 3.09 | 296        | 9    | 3.09  | 99.96        | 0.00  | M | I |
| 5  | NH <sub>eff</sub>               | 44.8       | 2.2  | 5.00 | 43.1       | 2.1  | 4.85  | 96.16        | 6.72  | M | I |
| 6  | NH <sub>in</sub>                | 96.6       | 4.8  | 5.00 | 104.6      | 3.0  | 2.91  | 108.28       | 37.02 | M | I |
| 7  | NO <sub>2eff</sub>              | 66.0       | 3.3  | 5.00 | 62.4       | 2.8  | 4.53  | 94.50        | 14.37 | M | I |
| 8  | NO <sub>3eff</sub>              | 0.8        | 0.0  | 5.00 | 0.8        | 0.0  | 5.00  | 99.93        | 0.00  | M | I |
| 9  | NO <sub>off</sub>               | 44         | 0    | 0.54 | 44         | 0    | 0.54  | 100.00       | 0.00  | M | I |
| 10 | O <sub>2aer</sub>               | 210,280    | 13   | 0.01 | 210,280    | 13   | 0.01  | 100.00       | 0.00  | M | I |
| 11 | O <sub>2off</sub>               | 187,767    | 93   | 0.05 | 187,766    | 93   | 0.05  | 100.00       | 0.00  | M | I |
| 12 | Q <sub>aer</sub>                | 2,292      | 35   | 2    | 2,292      | 35   | 1.51  | 100.00       | 0.00  | M | I |
| 13 | Q <sub>in</sub>                 | 36.48      | 0.05 | 0.13 | 36.48      | 0.05 | 0.13  | 100.00       | 0.00  | M | I |
| #  | Var                             | calculated | std  | sD%  | reconciled | std  | sD%   | $\Delta(\%)$ | i(%)  |   |   |
| 14 | Q <sub>inf</sub>                | 1,924      | 209  | 11   | 1,671      | 179  | 10.73 | 86.86        | 14.38 | U | I |
| 15 | Q <sub>off</sub>                | 4,438      | 218  | 5    | 4,201      | 187  | 4.44  | 94.65        | 14.22 | U | I |
| 16 | (TIC:NH) <sub>in</sub>          | 1.46       | 0.10 | 7    | 1.27       | 0.04 | 3.12  | 87.38        | 61.35 | U | I |

Table B2b. Gross error detection

| Test                                            | Evaluation                                                                                                                                                                                                                                                                                                                                                                                                                                                                                                                                                                                                                                                                                                                                                                                                                                                                                                                                                                                                                                                                                                                                                                                                                                                                                                                                                                                                                                                                |          |             |             |             |             |         |         |                    |      |      |      |      |   |                    |      |      |      |      |   |                   |   |      |   |      |   |                                 |      |      |      |      |   |                   |      |      |      |      |   |                  |      |      |      |      |   |                    |      |      |      |      |   |                   |      |      |      |      |   |                   |      |      |      |      |    |                   |      |      |      |      |    |                  |      |      |      |      |    |                 |   |      |   |      |
|-------------------------------------------------|---------------------------------------------------------------------------------------------------------------------------------------------------------------------------------------------------------------------------------------------------------------------------------------------------------------------------------------------------------------------------------------------------------------------------------------------------------------------------------------------------------------------------------------------------------------------------------------------------------------------------------------------------------------------------------------------------------------------------------------------------------------------------------------------------------------------------------------------------------------------------------------------------------------------------------------------------------------------------------------------------------------------------------------------------------------------------------------------------------------------------------------------------------------------------------------------------------------------------------------------------------------------------------------------------------------------------------------------------------------------------------------------------------------------------------------------------------------------------|----------|-------------|-------------|-------------|-------------|---------|---------|--------------------|------|------|------|------|---|--------------------|------|------|------|------|---|-------------------|---|------|---|------|---|---------------------------------|------|------|------|------|---|-------------------|------|------|------|------|---|------------------|------|------|------|------|---|--------------------|------|------|------|------|---|-------------------|------|------|------|------|---|-------------------|------|------|------|------|----|-------------------|------|------|------|------|----|------------------|------|------|------|------|----|-----------------|---|------|---|------|
| Global test                                     | gross error detected                                                                                                                                                                                                                                                                                                                                                                                                                                                                                                                                                                                                                                                                                                                                                                                                                                                                                                                                                                                                                                                                                                                                                                                                                                                                                                                                                                                                                                                      |          |             |             |             |             |         |         |                    |      |      |      |      |   |                    |      |      |      |      |   |                   |   |      |   |      |   |                                 |      |      |      |      |   |                   |      |      |      |      |   |                  |      |      |      |      |   |                    |      |      |      |      |   |                   |      |      |      |      |   |                   |      |      |      |      |    |                   |      |      |      |      |    |                  |      |      |      |      |    |                 |   |      |   |      |
| System degree of redundancy = 1                 |                                                                                                                                                                                                                                                                                                                                                                                                                                                                                                                                                                                                                                                                                                                                                                                                                                                                                                                                                                                                                                                                                                                                                                                                                                                                                                                                                                                                                                                                           |          |             |             |             |             |         |         |                    |      |      |      |      |   |                    |      |      |      |      |   |                   |   |      |   |      |   |                                 |      |      |      |      |   |                   |      |      |      |      |   |                  |      |      |      |      |   |                    |      |      |      |      |   |                   |      |      |      |      |   |                   |      |      |      |      |    |                   |      |      |      |      |    |                  |      |      |      |      |    |                 |   |      |   |      |
| t-statistic = 49.96, $\chi^2_{1-0.05,1} = 3.84$ |                                                                                                                                                                                                                                                                                                                                                                                                                                                                                                                                                                                                                                                                                                                                                                                                                                                                                                                                                                                                                                                                                                                                                                                                                                                                                                                                                                                                                                                                           |          |             |             |             |             |         |         |                    |      |      |      |      |   |                    |      |      |      |      |   |                   |   |      |   |      |   |                                 |      |      |      |      |   |                   |      |      |      |      |   |                  |      |      |      |      |   |                    |      |      |      |      |   |                   |      |      |      |      |   |                   |      |      |      |      |    |                   |      |      |      |      |    |                  |      |      |      |      |    |                 |   |      |   |      |
| p-value = 0.00                                  |                                                                                                                                                                                                                                                                                                                                                                                                                                                                                                                                                                                                                                                                                                                                                                                                                                                                                                                                                                                                                                                                                                                                                                                                                                                                                                                                                                                                                                                                           |          |             |             |             |             |         |         |                    |      |      |      |      |   |                    |      |      |      |      |   |                   |   |      |   |      |   |                                 |      |      |      |      |   |                   |      |      |      |      |   |                  |      |      |      |      |   |                    |      |      |      |      |   |                   |      |      |      |      |   |                   |      |      |      |      |    |                   |      |      |      |      |    |                  |      |      |      |      |    |                 |   |      |   |      |
| Measurement test                                | gross error detected                                                                                                                                                                                                                                                                                                                                                                                                                                                                                                                                                                                                                                                                                                                                                                                                                                                                                                                                                                                                                                                                                                                                                                                                                                                                                                                                                                                                                                                      |          |             |             |             |             |         |         |                    |      |      |      |      |   |                    |      |      |      |      |   |                   |   |      |   |      |   |                                 |      |      |      |      |   |                   |      |      |      |      |   |                  |      |      |      |      |   |                    |      |      |      |      |   |                   |      |      |      |      |   |                   |      |      |      |      |    |                   |      |      |      |      |    |                  |      |      |      |      |    |                 |   |      |   |      |
| Degree of freedom = 1                           |                                                                                                                                                                                                                                                                                                                                                                                                                                                                                                                                                                                                                                                                                                                                                                                                                                                                                                                                                                                                                                                                                                                                                                                                                                                                                                                                                                                                                                                                           |          |             |             |             |             |         |         |                    |      |      |      |      |   |                    |      |      |      |      |   |                   |   |      |   |      |   |                                 |      |      |      |      |   |                   |      |      |      |      |   |                  |      |      |      |      |   |                    |      |      |      |      |   |                   |      |      |      |      |   |                   |      |      |      |      |    |                   |      |      |      |      |    |                  |      |      |      |      |    |                 |   |      |   |      |
| t-statistic <sub>max</sub> = 1.96               |                                                                                                                                                                                                                                                                                                                                                                                                                                                                                                                                                                                                                                                                                                                                                                                                                                                                                                                                                                                                                                                                                                                                                                                                                                                                                                                                                                                                                                                                           |          |             |             |             |             |         |         |                    |      |      |      |      |   |                    |      |      |      |      |   |                   |   |      |   |      |   |                                 |      |      |      |      |   |                   |      |      |      |      |   |                  |      |      |      |      |   |                    |      |      |      |      |   |                   |      |      |      |      |   |                   |      |      |      |      |    |                   |      |      |      |      |    |                  |      |      |      |      |    |                 |   |      |   |      |
| p-value <sub>min</sub> = 0.03                   |                                                                                                                                                                                                                                                                                                                                                                                                                                                                                                                                                                                                                                                                                                                                                                                                                                                                                                                                                                                                                                                                                                                                                                                                                                                                                                                                                                                                                                                                           |          |             |             |             |             |         |         |                    |      |      |      |      |   |                    |      |      |      |      |   |                   |   |      |   |      |   |                                 |      |      |      |      |   |                   |      |      |      |      |   |                  |      |      |      |      |   |                    |      |      |      |      |   |                   |      |      |      |      |   |                   |      |      |      |      |    |                   |      |      |      |      |    |                  |      |      |      |      |    |                 |   |      |   |      |
|                                                 | <table border="1"> <thead> <tr> <th>#</th> <th>Var</th> <th>residual</th> <th>error</th> <th>t-statistic</th> <th>p-value</th> </tr> </thead> <tbody> <tr> <td>1</td> <td>CO<sub>2aer</sub></td> <td>0.00</td> <td>0.00</td> <td>2.13</td> <td>0.02</td> </tr> <tr> <td>2</td> <td>CO<sub>2off</sub></td> <td>0.17</td> <td>0.08</td> <td>2.13</td> <td>0.02</td> </tr> <tr> <td>3</td> <td>COD<sub>in</sub></td> <td>-</td> <td>0.00</td> <td>-</td> <td>0.50</td> </tr> <tr> <td>4</td> <td>N<sub>2</sub>O<sub>off</sub></td> <td>0.13</td> <td>0.06</td> <td>2.13</td> <td>0.02</td> </tr> <tr> <td>5</td> <td>NH<sub>eff</sub></td> <td>1.72</td> <td>0.81</td> <td>2.13</td> <td>0.02</td> </tr> <tr> <td>6</td> <td>NH<sub>in</sub></td> <td>7.99</td> <td>3.75</td> <td>2.13</td> <td>0.02</td> </tr> <tr> <td>7</td> <td>NO<sub>2eff</sub></td> <td>3.63</td> <td>1.70</td> <td>2.13</td> <td>0.02</td> </tr> <tr> <td>8</td> <td>NO<sub>off</sub></td> <td>0.00</td> <td>0.00</td> <td>2.13</td> <td>0.02</td> </tr> <tr> <td>9</td> <td>O<sub>2aer</sub></td> <td>0.00</td> <td>0.00</td> <td>2.13</td> <td>0.02</td> </tr> <tr> <td>10</td> <td>O<sub>2off</sub></td> <td>0.01</td> <td>0.00</td> <td>2.13</td> <td>0.02</td> </tr> <tr> <td>11</td> <td>Q<sub>aer</sub></td> <td>0.28</td> <td>0.13</td> <td>2.13</td> <td>0.02</td> </tr> <tr> <td>12</td> <td>Q<sub>in</sub></td> <td>-</td> <td>0.00</td> <td>-</td> <td>0.50</td> </tr> </tbody> </table> | #        | Var         | residual    | error       | t-statistic | p-value | 1       | CO <sub>2aer</sub> | 0.00 | 0.00 | 2.13 | 0.02 | 2 | CO <sub>2off</sub> | 0.17 | 0.08 | 2.13 | 0.02 | 3 | COD <sub>in</sub> | - | 0.00 | - | 0.50 | 4 | N <sub>2</sub> O <sub>off</sub> | 0.13 | 0.06 | 2.13 | 0.02 | 5 | NH <sub>eff</sub> | 1.72 | 0.81 | 2.13 | 0.02 | 6 | NH <sub>in</sub> | 7.99 | 3.75 | 2.13 | 0.02 | 7 | NO <sub>2eff</sub> | 3.63 | 1.70 | 2.13 | 0.02 | 8 | NO <sub>off</sub> | 0.00 | 0.00 | 2.13 | 0.02 | 9 | O <sub>2aer</sub> | 0.00 | 0.00 | 2.13 | 0.02 | 10 | O <sub>2off</sub> | 0.01 | 0.00 | 2.13 | 0.02 | 11 | Q <sub>aer</sub> | 0.28 | 0.13 | 2.13 | 0.02 | 12 | Q <sub>in</sub> | - | 0.00 | - | 0.50 |
| #                                               | Var                                                                                                                                                                                                                                                                                                                                                                                                                                                                                                                                                                                                                                                                                                                                                                                                                                                                                                                                                                                                                                                                                                                                                                                                                                                                                                                                                                                                                                                                       | residual | error       | t-statistic | p-value     |             |         |         |                    |      |      |      |      |   |                    |      |      |      |      |   |                   |   |      |   |      |   |                                 |      |      |      |      |   |                   |      |      |      |      |   |                  |      |      |      |      |   |                    |      |      |      |      |   |                   |      |      |      |      |   |                   |      |      |      |      |    |                   |      |      |      |      |    |                  |      |      |      |      |    |                 |   |      |   |      |
| 1                                               | CO <sub>2aer</sub>                                                                                                                                                                                                                                                                                                                                                                                                                                                                                                                                                                                                                                                                                                                                                                                                                                                                                                                                                                                                                                                                                                                                                                                                                                                                                                                                                                                                                                                        | 0.00     | 0.00        | 2.13        | 0.02        |             |         |         |                    |      |      |      |      |   |                    |      |      |      |      |   |                   |   |      |   |      |   |                                 |      |      |      |      |   |                   |      |      |      |      |   |                  |      |      |      |      |   |                    |      |      |      |      |   |                   |      |      |      |      |   |                   |      |      |      |      |    |                   |      |      |      |      |    |                  |      |      |      |      |    |                 |   |      |   |      |
| 2                                               | CO <sub>2off</sub>                                                                                                                                                                                                                                                                                                                                                                                                                                                                                                                                                                                                                                                                                                                                                                                                                                                                                                                                                                                                                                                                                                                                                                                                                                                                                                                                                                                                                                                        | 0.17     | 0.08        | 2.13        | 0.02        |             |         |         |                    |      |      |      |      |   |                    |      |      |      |      |   |                   |   |      |   |      |   |                                 |      |      |      |      |   |                   |      |      |      |      |   |                  |      |      |      |      |   |                    |      |      |      |      |   |                   |      |      |      |      |   |                   |      |      |      |      |    |                   |      |      |      |      |    |                  |      |      |      |      |    |                 |   |      |   |      |
| 3                                               | COD <sub>in</sub>                                                                                                                                                                                                                                                                                                                                                                                                                                                                                                                                                                                                                                                                                                                                                                                                                                                                                                                                                                                                                                                                                                                                                                                                                                                                                                                                                                                                                                                         | -        | 0.00        | -           | 0.50        |             |         |         |                    |      |      |      |      |   |                    |      |      |      |      |   |                   |   |      |   |      |   |                                 |      |      |      |      |   |                   |      |      |      |      |   |                  |      |      |      |      |   |                    |      |      |      |      |   |                   |      |      |      |      |   |                   |      |      |      |      |    |                   |      |      |      |      |    |                  |      |      |      |      |    |                 |   |      |   |      |
| 4                                               | N <sub>2</sub> O <sub>off</sub>                                                                                                                                                                                                                                                                                                                                                                                                                                                                                                                                                                                                                                                                                                                                                                                                                                                                                                                                                                                                                                                                                                                                                                                                                                                                                                                                                                                                                                           | 0.13     | 0.06        | 2.13        | 0.02        |             |         |         |                    |      |      |      |      |   |                    |      |      |      |      |   |                   |   |      |   |      |   |                                 |      |      |      |      |   |                   |      |      |      |      |   |                  |      |      |      |      |   |                    |      |      |      |      |   |                   |      |      |      |      |   |                   |      |      |      |      |    |                   |      |      |      |      |    |                  |      |      |      |      |    |                 |   |      |   |      |
| 5                                               | NH <sub>eff</sub>                                                                                                                                                                                                                                                                                                                                                                                                                                                                                                                                                                                                                                                                                                                                                                                                                                                                                                                                                                                                                                                                                                                                                                                                                                                                                                                                                                                                                                                         | 1.72     | 0.81        | 2.13        | 0.02        |             |         |         |                    |      |      |      |      |   |                    |      |      |      |      |   |                   |   |      |   |      |   |                                 |      |      |      |      |   |                   |      |      |      |      |   |                  |      |      |      |      |   |                    |      |      |      |      |   |                   |      |      |      |      |   |                   |      |      |      |      |    |                   |      |      |      |      |    |                  |      |      |      |      |    |                 |   |      |   |      |
| 6                                               | NH <sub>in</sub>                                                                                                                                                                                                                                                                                                                                                                                                                                                                                                                                                                                                                                                                                                                                                                                                                                                                                                                                                                                                                                                                                                                                                                                                                                                                                                                                                                                                                                                          | 7.99     | 3.75        | 2.13        | 0.02        |             |         |         |                    |      |      |      |      |   |                    |      |      |      |      |   |                   |   |      |   |      |   |                                 |      |      |      |      |   |                   |      |      |      |      |   |                  |      |      |      |      |   |                    |      |      |      |      |   |                   |      |      |      |      |   |                   |      |      |      |      |    |                   |      |      |      |      |    |                  |      |      |      |      |    |                 |   |      |   |      |
| 7                                               | NO <sub>2eff</sub>                                                                                                                                                                                                                                                                                                                                                                                                                                                                                                                                                                                                                                                                                                                                                                                                                                                                                                                                                                                                                                                                                                                                                                                                                                                                                                                                                                                                                                                        | 3.63     | 1.70        | 2.13        | 0.02        |             |         |         |                    |      |      |      |      |   |                    |      |      |      |      |   |                   |   |      |   |      |   |                                 |      |      |      |      |   |                   |      |      |      |      |   |                  |      |      |      |      |   |                    |      |      |      |      |   |                   |      |      |      |      |   |                   |      |      |      |      |    |                   |      |      |      |      |    |                  |      |      |      |      |    |                 |   |      |   |      |
| 8                                               | NO <sub>off</sub>                                                                                                                                                                                                                                                                                                                                                                                                                                                                                                                                                                                                                                                                                                                                                                                                                                                                                                                                                                                                                                                                                                                                                                                                                                                                                                                                                                                                                                                         | 0.00     | 0.00        | 2.13        | 0.02        |             |         |         |                    |      |      |      |      |   |                    |      |      |      |      |   |                   |   |      |   |      |   |                                 |      |      |      |      |   |                   |      |      |      |      |   |                  |      |      |      |      |   |                    |      |      |      |      |   |                   |      |      |      |      |   |                   |      |      |      |      |    |                   |      |      |      |      |    |                  |      |      |      |      |    |                 |   |      |   |      |
| 9                                               | O <sub>2aer</sub>                                                                                                                                                                                                                                                                                                                                                                                                                                                                                                                                                                                                                                                                                                                                                                                                                                                                                                                                                                                                                                                                                                                                                                                                                                                                                                                                                                                                                                                         | 0.00     | 0.00        | 2.13        | 0.02        |             |         |         |                    |      |      |      |      |   |                    |      |      |      |      |   |                   |   |      |   |      |   |                                 |      |      |      |      |   |                   |      |      |      |      |   |                  |      |      |      |      |   |                    |      |      |      |      |   |                   |      |      |      |      |   |                   |      |      |      |      |    |                   |      |      |      |      |    |                  |      |      |      |      |    |                 |   |      |   |      |
| 10                                              | O <sub>2off</sub>                                                                                                                                                                                                                                                                                                                                                                                                                                                                                                                                                                                                                                                                                                                                                                                                                                                                                                                                                                                                                                                                                                                                                                                                                                                                                                                                                                                                                                                         | 0.01     | 0.00        | 2.13        | 0.02        |             |         |         |                    |      |      |      |      |   |                    |      |      |      |      |   |                   |   |      |   |      |   |                                 |      |      |      |      |   |                   |      |      |      |      |   |                  |      |      |      |      |   |                    |      |      |      |      |   |                   |      |      |      |      |   |                   |      |      |      |      |    |                   |      |      |      |      |    |                  |      |      |      |      |    |                 |   |      |   |      |
| 11                                              | Q <sub>aer</sub>                                                                                                                                                                                                                                                                                                                                                                                                                                                                                                                                                                                                                                                                                                                                                                                                                                                                                                                                                                                                                                                                                                                                                                                                                                                                                                                                                                                                                                                          | 0.28     | 0.13        | 2.13        | 0.02        |             |         |         |                    |      |      |      |      |   |                    |      |      |      |      |   |                   |   |      |   |      |   |                                 |      |      |      |      |   |                   |      |      |      |      |   |                  |      |      |      |      |   |                    |      |      |      |      |   |                   |      |      |      |      |   |                   |      |      |      |      |    |                   |      |      |      |      |    |                  |      |      |      |      |    |                 |   |      |   |      |
| 12                                              | Q <sub>in</sub>                                                                                                                                                                                                                                                                                                                                                                                                                                                                                                                                                                                                                                                                                                                                                                                                                                                                                                                                                                                                                                                                                                                                                                                                                                                                                                                                                                                                                                                           | -        | 0.00        | -           | 0.50        |             |         |         |                    |      |      |      |      |   |                    |      |      |      |      |   |                   |   |      |   |      |   |                                 |      |      |      |      |   |                   |      |      |      |      |   |                  |      |      |      |      |   |                    |      |      |      |      |   |                   |      |      |      |      |   |                   |      |      |      |      |    |                   |      |      |      |      |    |                  |      |      |      |      |    |                 |   |      |   |      |
| Nodal test                                      | gross error detected                                                                                                                                                                                                                                                                                                                                                                                                                                                                                                                                                                                                                                                                                                                                                                                                                                                                                                                                                                                                                                                                                                                                                                                                                                                                                                                                                                                                                                                      |          |             |             |             |             |         |         |                    |      |      |      |      |   |                    |      |      |      |      |   |                   |   |      |   |      |   |                                 |      |      |      |      |   |                   |      |      |      |      |   |                  |      |      |      |      |   |                    |      |      |      |      |   |                   |      |      |      |      |   |                   |      |      |      |      |    |                   |      |      |      |      |    |                  |      |      |      |      |    |                 |   |      |   |      |
| Degree of freedom = 1                           |                                                                                                                                                                                                                                                                                                                                                                                                                                                                                                                                                                                                                                                                                                                                                                                                                                                                                                                                                                                                                                                                                                                                                                                                                                                                                                                                                                                                                                                                           |          |             |             |             |             |         |         |                    |      |      |      |      |   |                    |      |      |      |      |   |                   |   |      |   |      |   |                                 |      |      |      |      |   |                   |      |      |      |      |   |                  |      |      |      |      |   |                    |      |      |      |      |   |                   |      |      |      |      |   |                   |      |      |      |      |    |                   |      |      |      |      |    |                  |      |      |      |      |    |                 |   |      |   |      |
| t-statistic <sub>max</sub> = 1.96               |                                                                                                                                                                                                                                                                                                                                                                                                                                                                                                                                                                                                                                                                                                                                                                                                                                                                                                                                                                                                                                                                                                                                                                                                                                                                                                                                                                                                                                                                           |          |             |             |             |             |         |         |                    |      |      |      |      |   |                    |      |      |      |      |   |                   |   |      |   |      |   |                                 |      |      |      |      |   |                   |      |      |      |      |   |                  |      |      |      |      |   |                    |      |      |      |      |   |                   |      |      |      |      |   |                   |      |      |      |      |    |                   |      |      |      |      |    |                  |      |      |      |      |    |                 |   |      |   |      |
| p-value <sub>min</sub> = 0.03                   |                                                                                                                                                                                                                                                                                                                                                                                                                                                                                                                                                                                                                                                                                                                                                                                                                                                                                                                                                                                                                                                                                                                                                                                                                                                                                                                                                                                                                                                                           |          |             |             |             |             |         |         |                    |      |      |      |      |   |                    |      |      |      |      |   |                   |   |      |   |      |   |                                 |      |      |      |      |   |                   |      |      |      |      |   |                  |      |      |      |      |   |                    |      |      |      |      |   |                   |      |      |      |      |   |                   |      |      |      |      |    |                   |      |      |      |      |    |                  |      |      |      |      |    |                 |   |      |   |      |
|                                                 | <table border="1"> <thead> <tr> <th>#</th> <th>misbalance</th> <th>error</th> <th>t-statistic</th> <th>p-value</th> </tr> </thead> <tbody> <tr> <td>1</td> <td>-30,228</td> <td>14,203</td> <td>2.13</td> <td>0.02</td> </tr> </tbody> </table>                                                                                                                                                                                                                                                                                                                                                                                                                                                                                                                                                                                                                                                                                                                                                                                                                                                                                                                                                                                                                                                                                                                                                                                                                           | #        | misbalance  | error       | t-statistic | p-value     | 1       | -30,228 | 14,203             | 2.13 | 0.02 |      |      |   |                    |      |      |      |      |   |                   |   |      |   |      |   |                                 |      |      |      |      |   |                   |      |      |      |      |   |                  |      |      |      |      |   |                    |      |      |      |      |   |                   |      |      |      |      |   |                   |      |      |      |      |    |                   |      |      |      |      |    |                  |      |      |      |      |    |                 |   |      |   |      |
| #                                               | misbalance                                                                                                                                                                                                                                                                                                                                                                                                                                                                                                                                                                                                                                                                                                                                                                                                                                                                                                                                                                                                                                                                                                                                                                                                                                                                                                                                                                                                                                                                | error    | t-statistic | p-value     |             |             |         |         |                    |      |      |      |      |   |                    |      |      |      |      |   |                   |   |      |   |      |   |                                 |      |      |      |      |   |                   |      |      |      |      |   |                  |      |      |      |      |   |                    |      |      |      |      |   |                   |      |      |      |      |   |                   |      |      |      |      |    |                   |      |      |      |      |    |                  |      |      |      |      |    |                 |   |      |   |      |
| 1                                               | -30,228                                                                                                                                                                                                                                                                                                                                                                                                                                                                                                                                                                                                                                                                                                                                                                                                                                                                                                                                                                                                                                                                                                                                                                                                                                                                                                                                                                                                                                                                   | 14,203   | 2.13        | 0.02        |             |             |         |         |                    |      |      |      |      |   |                    |      |      |      |      |   |                   |   |      |   |      |   |                                 |      |      |      |      |   |                   |      |      |      |      |   |                  |      |      |      |      |   |                    |      |      |      |      |   |                   |      |      |      |      |   |                   |      |      |      |      |    |                   |      |      |      |      |    |                  |      |      |      |      |    |                 |   |      |   |      |



## Results for S3

Table B3a. Data reconciliation (iteration = 4, convergence tolerance =  $3.2 \times 10^{-08}$ , CPU time = 0.7s)

| #  | Var                             | measured   | std  | sD%   | reconciled | std  | sD%   | $\Delta(\%)$ | i(%)  |   |   |
|----|---------------------------------|------------|------|-------|------------|------|-------|--------------|-------|---|---|
| 1  | CO <sub>2aer</sub>              | 833        | 147  | 17.60 | 833        | 147  | 17.60 | 100.01       | 0.00  | M | I |
| 2  | CO <sub>2off</sub>              | 26,135     | 353  | 1.35  | 26,135     | 353  | 1.35  | 100.00       | 0.00  | M | I |
| 3  | COD <sub>in</sub>               | 2.78       | 0.01 | 0.36  | 2.78       | 0.01 | 0.36  | 100.00       | 0.00  | M | I |
| 4  | N <sub>2</sub> O <sub>off</sub> | 386        | 13   | 3.30  | 386        | 13   | 3.30  | 99.98        | 0.00  | M | I |
| 5  | NH <sub>eff</sub>               | 36.7       | 1.8  | 5.00  | 36.3       | 1.7  | 4.67  | 98.96        | 7.52  | M | I |
| 6  | NH <sub>in</sub>                | 78.0       | 3.9  | 5.00  | 79.7       | 2.3  | 2.88  | 102.21       | 41.10 | M | I |
| 7  | NO <sub>2eff</sub>              | 44.1       | 2.2  | 5.00  | 43.6       | 2.0  | 4.52  | 98.77        | 10.68 | M | I |
| 8  | NO <sub>3eff</sub>              | 0.5        | 0.0  | 5.00  | 0.5        | 0.0  | 5.00  | 99.99        | 0.00  | M | I |
| 9  | NO <sub>off</sub>               | 36         | 1    | 1.57  | 36         | 1    | 1.57  | 100.00       | 0.00  | M | I |
| 10 | O <sub>2aer</sub>               | 210,375    | 108  | 0.05  | 210,375    | 108  | 0.05  | 100.00       | 0.00  | M | I |
| 11 | O <sub>2off</sub>               | 191,161    | 244  | 0.13  | 191,160    | 244  | 0.13  | 100.00       | 0.00  | M | I |
| 12 | Q <sub>aer</sub>                | 2,001      | 44   | 2     | 2,001      | 44   | 2.19  | 100.00       | 0.00  | M | I |
| 13 | Q <sub>in</sub>                 | 30.75      | 0.05 | 0.16  | 30.75      | 0.05 | 0.16  | 100.00       | 0.00  | M | I |
| #  | Var                             | calculated | std  | sD%   | reconciled | std  | sD%   | $\Delta(\%)$ | i(%)  |   |   |
| 14 | Q <sub>inf</sub>                | 812        | 154  | 19    | 760        | 140  | 18.40 | 93.52        | 9.11  | U | I |
| 15 | Q <sub>off</sub>                | 2,957      | 155  | 5     | 2,921      | 141  | 4.83  | 98.80        | 9.28  | U | I |
| 16 | (TIC:NH) <sub>in</sub>          | 1.20       | 0.09 | 8     | 1.16       | 0.05 | 4.24  | 96.66        | 45.62 | U | I |

Table B3b. Gross error detection

| Test                                                                                                                        | Evaluation                                                                                                                                                                                                                                                                                                                                                                                                                                                                                                                                                                                                                                                                                                                                                                                                                                                                                                                                                                                                                                                                                                                                                                                                                                                                                                                                                                                                                                                                |          |             |             |             |             |         |        |                    |      |      |      |      |   |                    |      |      |      |      |   |                   |   |      |   |      |   |                                 |      |      |      |      |   |                   |      |      |      |      |   |                  |      |      |      |      |   |                    |      |      |      |      |   |                   |      |      |      |      |   |                   |      |      |      |      |    |                   |      |      |      |      |    |                  |      |      |      |      |    |                 |   |      |   |      |
|-----------------------------------------------------------------------------------------------------------------------------|---------------------------------------------------------------------------------------------------------------------------------------------------------------------------------------------------------------------------------------------------------------------------------------------------------------------------------------------------------------------------------------------------------------------------------------------------------------------------------------------------------------------------------------------------------------------------------------------------------------------------------------------------------------------------------------------------------------------------------------------------------------------------------------------------------------------------------------------------------------------------------------------------------------------------------------------------------------------------------------------------------------------------------------------------------------------------------------------------------------------------------------------------------------------------------------------------------------------------------------------------------------------------------------------------------------------------------------------------------------------------------------------------------------------------------------------------------------------------|----------|-------------|-------------|-------------|-------------|---------|--------|--------------------|------|------|------|------|---|--------------------|------|------|------|------|---|-------------------|---|------|---|------|---|---------------------------------|------|------|------|------|---|-------------------|------|------|------|------|---|------------------|------|------|------|------|---|--------------------|------|------|------|------|---|-------------------|------|------|------|------|---|-------------------|------|------|------|------|----|-------------------|------|------|------|------|----|------------------|------|------|------|------|----|-----------------|---|------|---|------|
| <b>Global test</b><br>System degree of redundancy = 1<br>t-statistic = 3.28, $\chi^2_{1-0.05,1} = 3.84$ ,<br>p-value = 0.07 | no gross error detected                                                                                                                                                                                                                                                                                                                                                                                                                                                                                                                                                                                                                                                                                                                                                                                                                                                                                                                                                                                                                                                                                                                                                                                                                                                                                                                                                                                                                                                   |          |             |             |             |             |         |        |                    |      |      |      |      |   |                    |      |      |      |      |   |                   |   |      |   |      |   |                                 |      |      |      |      |   |                   |      |      |      |      |   |                  |      |      |      |      |   |                    |      |      |      |      |   |                   |      |      |      |      |   |                   |      |      |      |      |    |                   |      |      |      |      |    |                  |      |      |      |      |    |                 |   |      |   |      |
| <b>Measurement test</b><br>Degree of freedom = 1<br>t-statistic <sub>max</sub> = 1.96<br>p-value <sub>min</sub> = 0.03      | no gross error detected                                                                                                                                                                                                                                                                                                                                                                                                                                                                                                                                                                                                                                                                                                                                                                                                                                                                                                                                                                                                                                                                                                                                                                                                                                                                                                                                                                                                                                                   |          |             |             |             |             |         |        |                    |      |      |      |      |   |                    |      |      |      |      |   |                   |   |      |   |      |   |                                 |      |      |      |      |   |                   |      |      |      |      |   |                  |      |      |      |      |   |                    |      |      |      |      |   |                   |      |      |      |      |   |                   |      |      |      |      |    |                   |      |      |      |      |    |                  |      |      |      |      |    |                 |   |      |   |      |
|                                                                                                                             | <table border="1"> <thead> <tr> <th>#</th> <th>Var</th> <th>residual</th> <th>error</th> <th>t-statistic</th> <th>p-value</th> </tr> </thead> <tbody> <tr> <td>1</td> <td>CO<sub>2aer</sub></td> <td>0.06</td> <td>0.10</td> <td>0.55</td> <td>0.29</td> </tr> <tr> <td>2</td> <td>CO<sub>2off</sub></td> <td>0.33</td> <td>0.61</td> <td>0.55</td> <td>0.29</td> </tr> <tr> <td>3</td> <td>COD<sub>in</sub></td> <td>-</td> <td>0.00</td> <td>-</td> <td>0.50</td> </tr> <tr> <td>4</td> <td>N<sub>2</sub>O<sub>off</sub></td> <td>0.07</td> <td>0.12</td> <td>0.55</td> <td>0.29</td> </tr> <tr> <td>5</td> <td>NH<sub>eff</sub></td> <td>0.38</td> <td>0.70</td> <td>0.55</td> <td>0.29</td> </tr> <tr> <td>6</td> <td>NH<sub>in</sub></td> <td>1.72</td> <td>3.15</td> <td>0.55</td> <td>0.29</td> </tr> <tr> <td>7</td> <td>NO<sub>2eff</sub></td> <td>0.54</td> <td>0.99</td> <td>0.55</td> <td>0.29</td> </tr> <tr> <td>8</td> <td>NO<sub>off</sub></td> <td>0.00</td> <td>0.00</td> <td>0.55</td> <td>0.29</td> </tr> <tr> <td>9</td> <td>O<sub>2aer</sub></td> <td>0.00</td> <td>0.00</td> <td>0.55</td> <td>0.29</td> </tr> <tr> <td>10</td> <td>O<sub>2off</sub></td> <td>0.15</td> <td>0.27</td> <td>0.55</td> <td>0.29</td> </tr> <tr> <td>11</td> <td>Q<sub>aer</sub></td> <td>0.75</td> <td>1.38</td> <td>0.55</td> <td>0.29</td> </tr> <tr> <td>12</td> <td>Q<sub>in</sub></td> <td>-</td> <td>0.00</td> <td>-</td> <td>0.50</td> </tr> </tbody> </table> | #        | Var         | residual    | error       | t-statistic | p-value | 1      | CO <sub>2aer</sub> | 0.06 | 0.10 | 0.55 | 0.29 | 2 | CO <sub>2off</sub> | 0.33 | 0.61 | 0.55 | 0.29 | 3 | COD <sub>in</sub> | - | 0.00 | - | 0.50 | 4 | N <sub>2</sub> O <sub>off</sub> | 0.07 | 0.12 | 0.55 | 0.29 | 5 | NH <sub>eff</sub> | 0.38 | 0.70 | 0.55 | 0.29 | 6 | NH <sub>in</sub> | 1.72 | 3.15 | 0.55 | 0.29 | 7 | NO <sub>2eff</sub> | 0.54 | 0.99 | 0.55 | 0.29 | 8 | NO <sub>off</sub> | 0.00 | 0.00 | 0.55 | 0.29 | 9 | O <sub>2aer</sub> | 0.00 | 0.00 | 0.55 | 0.29 | 10 | O <sub>2off</sub> | 0.15 | 0.27 | 0.55 | 0.29 | 11 | Q <sub>aer</sub> | 0.75 | 1.38 | 0.55 | 0.29 | 12 | Q <sub>in</sub> | - | 0.00 | - | 0.50 |
| #                                                                                                                           | Var                                                                                                                                                                                                                                                                                                                                                                                                                                                                                                                                                                                                                                                                                                                                                                                                                                                                                                                                                                                                                                                                                                                                                                                                                                                                                                                                                                                                                                                                       | residual | error       | t-statistic | p-value     |             |         |        |                    |      |      |      |      |   |                    |      |      |      |      |   |                   |   |      |   |      |   |                                 |      |      |      |      |   |                   |      |      |      |      |   |                  |      |      |      |      |   |                    |      |      |      |      |   |                   |      |      |      |      |   |                   |      |      |      |      |    |                   |      |      |      |      |    |                  |      |      |      |      |    |                 |   |      |   |      |
| 1                                                                                                                           | CO <sub>2aer</sub>                                                                                                                                                                                                                                                                                                                                                                                                                                                                                                                                                                                                                                                                                                                                                                                                                                                                                                                                                                                                                                                                                                                                                                                                                                                                                                                                                                                                                                                        | 0.06     | 0.10        | 0.55        | 0.29        |             |         |        |                    |      |      |      |      |   |                    |      |      |      |      |   |                   |   |      |   |      |   |                                 |      |      |      |      |   |                   |      |      |      |      |   |                  |      |      |      |      |   |                    |      |      |      |      |   |                   |      |      |      |      |   |                   |      |      |      |      |    |                   |      |      |      |      |    |                  |      |      |      |      |    |                 |   |      |   |      |
| 2                                                                                                                           | CO <sub>2off</sub>                                                                                                                                                                                                                                                                                                                                                                                                                                                                                                                                                                                                                                                                                                                                                                                                                                                                                                                                                                                                                                                                                                                                                                                                                                                                                                                                                                                                                                                        | 0.33     | 0.61        | 0.55        | 0.29        |             |         |        |                    |      |      |      |      |   |                    |      |      |      |      |   |                   |   |      |   |      |   |                                 |      |      |      |      |   |                   |      |      |      |      |   |                  |      |      |      |      |   |                    |      |      |      |      |   |                   |      |      |      |      |   |                   |      |      |      |      |    |                   |      |      |      |      |    |                  |      |      |      |      |    |                 |   |      |   |      |
| 3                                                                                                                           | COD <sub>in</sub>                                                                                                                                                                                                                                                                                                                                                                                                                                                                                                                                                                                                                                                                                                                                                                                                                                                                                                                                                                                                                                                                                                                                                                                                                                                                                                                                                                                                                                                         | -        | 0.00        | -           | 0.50        |             |         |        |                    |      |      |      |      |   |                    |      |      |      |      |   |                   |   |      |   |      |   |                                 |      |      |      |      |   |                   |      |      |      |      |   |                  |      |      |      |      |   |                    |      |      |      |      |   |                   |      |      |      |      |   |                   |      |      |      |      |    |                   |      |      |      |      |    |                  |      |      |      |      |    |                 |   |      |   |      |
| 4                                                                                                                           | N <sub>2</sub> O <sub>off</sub>                                                                                                                                                                                                                                                                                                                                                                                                                                                                                                                                                                                                                                                                                                                                                                                                                                                                                                                                                                                                                                                                                                                                                                                                                                                                                                                                                                                                                                           | 0.07     | 0.12        | 0.55        | 0.29        |             |         |        |                    |      |      |      |      |   |                    |      |      |      |      |   |                   |   |      |   |      |   |                                 |      |      |      |      |   |                   |      |      |      |      |   |                  |      |      |      |      |   |                    |      |      |      |      |   |                   |      |      |      |      |   |                   |      |      |      |      |    |                   |      |      |      |      |    |                  |      |      |      |      |    |                 |   |      |   |      |
| 5                                                                                                                           | NH <sub>eff</sub>                                                                                                                                                                                                                                                                                                                                                                                                                                                                                                                                                                                                                                                                                                                                                                                                                                                                                                                                                                                                                                                                                                                                                                                                                                                                                                                                                                                                                                                         | 0.38     | 0.70        | 0.55        | 0.29        |             |         |        |                    |      |      |      |      |   |                    |      |      |      |      |   |                   |   |      |   |      |   |                                 |      |      |      |      |   |                   |      |      |      |      |   |                  |      |      |      |      |   |                    |      |      |      |      |   |                   |      |      |      |      |   |                   |      |      |      |      |    |                   |      |      |      |      |    |                  |      |      |      |      |    |                 |   |      |   |      |
| 6                                                                                                                           | NH <sub>in</sub>                                                                                                                                                                                                                                                                                                                                                                                                                                                                                                                                                                                                                                                                                                                                                                                                                                                                                                                                                                                                                                                                                                                                                                                                                                                                                                                                                                                                                                                          | 1.72     | 3.15        | 0.55        | 0.29        |             |         |        |                    |      |      |      |      |   |                    |      |      |      |      |   |                   |   |      |   |      |   |                                 |      |      |      |      |   |                   |      |      |      |      |   |                  |      |      |      |      |   |                    |      |      |      |      |   |                   |      |      |      |      |   |                   |      |      |      |      |    |                   |      |      |      |      |    |                  |      |      |      |      |    |                 |   |      |   |      |
| 7                                                                                                                           | NO <sub>2eff</sub>                                                                                                                                                                                                                                                                                                                                                                                                                                                                                                                                                                                                                                                                                                                                                                                                                                                                                                                                                                                                                                                                                                                                                                                                                                                                                                                                                                                                                                                        | 0.54     | 0.99        | 0.55        | 0.29        |             |         |        |                    |      |      |      |      |   |                    |      |      |      |      |   |                   |   |      |   |      |   |                                 |      |      |      |      |   |                   |      |      |      |      |   |                  |      |      |      |      |   |                    |      |      |      |      |   |                   |      |      |      |      |   |                   |      |      |      |      |    |                   |      |      |      |      |    |                  |      |      |      |      |    |                 |   |      |   |      |
| 8                                                                                                                           | NO <sub>off</sub>                                                                                                                                                                                                                                                                                                                                                                                                                                                                                                                                                                                                                                                                                                                                                                                                                                                                                                                                                                                                                                                                                                                                                                                                                                                                                                                                                                                                                                                         | 0.00     | 0.00        | 0.55        | 0.29        |             |         |        |                    |      |      |      |      |   |                    |      |      |      |      |   |                   |   |      |   |      |   |                                 |      |      |      |      |   |                   |      |      |      |      |   |                  |      |      |      |      |   |                    |      |      |      |      |   |                   |      |      |      |      |   |                   |      |      |      |      |    |                   |      |      |      |      |    |                  |      |      |      |      |    |                 |   |      |   |      |
| 9                                                                                                                           | O <sub>2aer</sub>                                                                                                                                                                                                                                                                                                                                                                                                                                                                                                                                                                                                                                                                                                                                                                                                                                                                                                                                                                                                                                                                                                                                                                                                                                                                                                                                                                                                                                                         | 0.00     | 0.00        | 0.55        | 0.29        |             |         |        |                    |      |      |      |      |   |                    |      |      |      |      |   |                   |   |      |   |      |   |                                 |      |      |      |      |   |                   |      |      |      |      |   |                  |      |      |      |      |   |                    |      |      |      |      |   |                   |      |      |      |      |   |                   |      |      |      |      |    |                   |      |      |      |      |    |                  |      |      |      |      |    |                 |   |      |   |      |
| 10                                                                                                                          | O <sub>2off</sub>                                                                                                                                                                                                                                                                                                                                                                                                                                                                                                                                                                                                                                                                                                                                                                                                                                                                                                                                                                                                                                                                                                                                                                                                                                                                                                                                                                                                                                                         | 0.15     | 0.27        | 0.55        | 0.29        |             |         |        |                    |      |      |      |      |   |                    |      |      |      |      |   |                   |   |      |   |      |   |                                 |      |      |      |      |   |                   |      |      |      |      |   |                  |      |      |      |      |   |                    |      |      |      |      |   |                   |      |      |      |      |   |                   |      |      |      |      |    |                   |      |      |      |      |    |                  |      |      |      |      |    |                 |   |      |   |      |
| 11                                                                                                                          | Q <sub>aer</sub>                                                                                                                                                                                                                                                                                                                                                                                                                                                                                                                                                                                                                                                                                                                                                                                                                                                                                                                                                                                                                                                                                                                                                                                                                                                                                                                                                                                                                                                          | 0.75     | 1.38        | 0.55        | 0.29        |             |         |        |                    |      |      |      |      |   |                    |      |      |      |      |   |                   |   |      |   |      |   |                                 |      |      |      |      |   |                   |      |      |      |      |   |                  |      |      |      |      |   |                    |      |      |      |      |   |                   |      |      |      |      |   |                   |      |      |      |      |    |                   |      |      |      |      |    |                  |      |      |      |      |    |                 |   |      |   |      |
| 12                                                                                                                          | Q <sub>in</sub>                                                                                                                                                                                                                                                                                                                                                                                                                                                                                                                                                                                                                                                                                                                                                                                                                                                                                                                                                                                                                                                                                                                                                                                                                                                                                                                                                                                                                                                           | -        | 0.00        | -           | 0.50        |             |         |        |                    |      |      |      |      |   |                    |      |      |      |      |   |                   |   |      |   |      |   |                                 |      |      |      |      |   |                   |      |      |      |      |   |                  |      |      |      |      |   |                    |      |      |      |      |   |                   |      |      |      |      |   |                   |      |      |      |      |    |                   |      |      |      |      |    |                  |      |      |      |      |    |                 |   |      |   |      |
| <b>Nodal test</b><br>Degree of freedom = 1<br>t-statistic <sub>max</sub> = 1.96<br>p-value <sub>min</sub> = 0.03            | no gross error detected                                                                                                                                                                                                                                                                                                                                                                                                                                                                                                                                                                                                                                                                                                                                                                                                                                                                                                                                                                                                                                                                                                                                                                                                                                                                                                                                                                                                                                                   |          |             |             |             |             |         |        |                    |      |      |      |      |   |                    |      |      |      |      |   |                   |   |      |   |      |   |                                 |      |      |      |      |   |                   |      |      |      |      |   |                  |      |      |      |      |   |                    |      |      |      |      |   |                   |      |      |      |      |   |                   |      |      |      |      |    |                   |      |      |      |      |    |                  |      |      |      |      |    |                 |   |      |   |      |
|                                                                                                                             | <table border="1"> <thead> <tr> <th>#</th> <th>misbalance</th> <th>error</th> <th>t-statistic</th> <th>p-value</th> </tr> </thead> <tbody> <tr> <td>1</td> <td>-3,477</td> <td>6,362</td> <td>0.55</td> <td>0.29</td> </tr> </tbody> </table>                                                                                                                                                                                                                                                                                                                                                                                                                                                                                                                                                                                                                                                                                                                                                                                                                                                                                                                                                                                                                                                                                                                                                                                                                             | #        | misbalance  | error       | t-statistic | p-value     | 1       | -3,477 | 6,362              | 0.55 | 0.29 |      |      |   |                    |      |      |      |      |   |                   |   |      |   |      |   |                                 |      |      |      |      |   |                   |      |      |      |      |   |                  |      |      |      |      |   |                    |      |      |      |      |   |                   |      |      |      |      |   |                   |      |      |      |      |    |                   |      |      |      |      |    |                  |      |      |      |      |    |                 |   |      |   |      |
| #                                                                                                                           | misbalance                                                                                                                                                                                                                                                                                                                                                                                                                                                                                                                                                                                                                                                                                                                                                                                                                                                                                                                                                                                                                                                                                                                                                                                                                                                                                                                                                                                                                                                                | error    | t-statistic | p-value     |             |             |         |        |                    |      |      |      |      |   |                    |      |      |      |      |   |                   |   |      |   |      |   |                                 |      |      |      |      |   |                   |      |      |      |      |   |                  |      |      |      |      |   |                    |      |      |      |      |   |                   |      |      |      |      |   |                   |      |      |      |      |    |                   |      |      |      |      |    |                  |      |      |      |      |    |                 |   |      |   |      |
| 1                                                                                                                           | -3,477                                                                                                                                                                                                                                                                                                                                                                                                                                                                                                                                                                                                                                                                                                                                                                                                                                                                                                                                                                                                                                                                                                                                                                                                                                                                                                                                                                                                                                                                    | 6,362    | 0.55        | 0.29        |             |             |         |        |                    |      |      |      |      |   |                    |      |      |      |      |   |                   |   |      |   |      |   |                                 |      |      |      |      |   |                   |      |      |      |      |   |                  |      |      |      |      |   |                    |      |      |      |      |   |                   |      |      |      |      |   |                   |      |      |      |      |    |                   |      |      |      |      |    |                  |      |      |      |      |    |                 |   |      |   |      |

## Results for S4

Table B4a. Data reconciliation (iteration = 3, convergence tolerance =  $2.1 \times 10^{-09}$ , CPU time = 0.7s)

| #  | Var                             | measured   | std  | sD%  | reconciled | std  | sD%   | $\Delta(\%)$ | i(%)  |   |   |
|----|---------------------------------|------------|------|------|------------|------|-------|--------------|-------|---|---|
| 1  | CO <sub>2aer</sub>              | 511        | 5    | 0.91 | 511        | 5    | 0.91  | 100.00       | 0.00  | M | I |
| 2  | CO <sub>2off</sub>              | 28,438     | 247  | 0.87 | 28,438     | 247  | 0.87  | 100.00       | 0.00  | M | I |
| 3  | COD <sub>in</sub>               | 2.78       | 0.01 | 0.36 | 2.78       | 0.01 | 0.36  | 100.00       | 0.00  | M | I |
| 4  | N <sub>2</sub> O <sub>off</sub> | 265        | 6    | 2.11 | 265        | 6    | 2.11  | 100.00       | 0.00  | M | I |
| 5  | NH <sub>eff</sub>               | 37.3       | 1.9  | 5.00 | 37.6       | 1.7  | 4.63  | 100.97       | 6.45  | M | I |
| 6  | NH <sub>in</sub>                | 87.1       | 4.4  | 5.00 | 85.2       | 2.5  | 2.89  | 97.74        | 43.57 | M | I |
| 7  | NO <sub>2eff</sub>              | 47.8       | 2.4  | 5.00 | 48.4       | 2.1  | 4.44  | 101.21       | 10.20 | M | I |
| 8  | NO <sub>3eff</sub>              | 0.5        | 0.0  | 5.00 | 0.5        | 0.0  | 5.00  | 100.01       | 0.00  | M | I |
| 9  | NO <sub>off</sub>               | 42         | 0    | 0.98 | 42         | 0    | 0.98  | 100.00       | 0.00  | M | I |
| 10 | O <sub>2aer</sub>               | 210,534    | 15   | 0.01 | 210,534    | 15   | 0.01  | 100.00       | 0.00  | M | I |
| 11 | O <sub>2off</sub>               | 189,705    | 161  | 0.08 | 189,705    | 161  | 0.08  | 100.00       | 0.00  | M | I |
| 12 | Q <sub>aer</sub>                | 2,160      | 36   | 2    | 2,160      | 36   | 1.68  | 100.00       | 0.00  | M | I |
| 13 | Q <sub>in</sub>                 | 33.45      | 0.08 | 0.23 | 33.45      | 0.08 | 0.23  | 100.00       | 0.00  | M | I |
| #  | Var                             | calculated | std  | sD%  | reconciled | std  | sD%   | $\Delta(\%)$ | i(%)  |   |   |
| 14 | Q <sub>inf</sub>                | 881        | 156  | 18   | 896        | 141  | 15.73 | 101.66       | 9.62  | U | I |
| 15 | Q <sub>off</sub>                | 3,201      | 160  | 5    | 3,239      | 144  | 4.46  | 101.17       | 9.56  | U | I |
| 16 | (TIC:NH) <sub>in</sub>          | 1.18       | 0.08 | 7    | 1.22       | 0.04 | 3.43  | 103.53       | 50.50 | U | I |

Table B4b. Gross error detection

| Test                                                                                                                      | Evaluation                                                                                                                                                                                                                                                                                                                                                                                                                                                                                                                                                                                                                                                                                                                                                                                                                                                                                                                                                                                                                                                                                                                                                                                                                                                                                                                                                                                                                                                                |          |             |             |             |             |         |       |                    |      |      |      |      |   |                    |      |      |      |      |   |                   |   |      |   |      |   |                                 |      |      |      |      |   |                   |      |      |      |      |   |                  |      |      |      |      |   |                    |      |      |      |      |   |                   |      |      |      |      |   |                   |      |      |      |      |    |                   |      |      |      |      |    |                  |      |      |      |      |    |                 |   |      |   |      |
|---------------------------------------------------------------------------------------------------------------------------|---------------------------------------------------------------------------------------------------------------------------------------------------------------------------------------------------------------------------------------------------------------------------------------------------------------------------------------------------------------------------------------------------------------------------------------------------------------------------------------------------------------------------------------------------------------------------------------------------------------------------------------------------------------------------------------------------------------------------------------------------------------------------------------------------------------------------------------------------------------------------------------------------------------------------------------------------------------------------------------------------------------------------------------------------------------------------------------------------------------------------------------------------------------------------------------------------------------------------------------------------------------------------------------------------------------------------------------------------------------------------------------------------------------------------------------------------------------------------|----------|-------------|-------------|-------------|-------------|---------|-------|--------------------|------|------|------|------|---|--------------------|------|------|------|------|---|-------------------|---|------|---|------|---|---------------------------------|------|------|------|------|---|-------------------|------|------|------|------|---|------------------|------|------|------|------|---|--------------------|------|------|------|------|---|-------------------|------|------|------|------|---|-------------------|------|------|------|------|----|-------------------|------|------|------|------|----|------------------|------|------|------|------|----|-----------------|---|------|---|------|
| <b>Global test</b><br>System degree of redundancy = 1<br>t-statistic = 3.31, $\chi_{1-0.05,1}^2 = 3.84$<br>p-value = 0.07 | no gross error detected                                                                                                                                                                                                                                                                                                                                                                                                                                                                                                                                                                                                                                                                                                                                                                                                                                                                                                                                                                                                                                                                                                                                                                                                                                                                                                                                                                                                                                                   |          |             |             |             |             |         |       |                    |      |      |      |      |   |                    |      |      |      |      |   |                   |   |      |   |      |   |                                 |      |      |      |      |   |                   |      |      |      |      |   |                  |      |      |      |      |   |                    |      |      |      |      |   |                   |      |      |      |      |   |                   |      |      |      |      |    |                   |      |      |      |      |    |                  |      |      |      |      |    |                 |   |      |   |      |
| <b>Measurement test</b><br>Degree of freedom = 1<br>t-statistic <sub>max</sub> = 1.96<br>p-value <sub>min</sub> = 0.03    | no gross error detected                                                                                                                                                                                                                                                                                                                                                                                                                                                                                                                                                                                                                                                                                                                                                                                                                                                                                                                                                                                                                                                                                                                                                                                                                                                                                                                                                                                                                                                   |          |             |             |             |             |         |       |                    |      |      |      |      |   |                    |      |      |      |      |   |                   |   |      |   |      |   |                                 |      |      |      |      |   |                   |      |      |      |      |   |                  |      |      |      |      |   |                    |      |      |      |      |   |                   |      |      |      |      |   |                   |      |      |      |      |    |                   |      |      |      |      |    |                  |      |      |      |      |    |                 |   |      |   |      |
|                                                                                                                           | <table border="1"> <thead> <tr> <th>#</th> <th>Var</th> <th>residual</th> <th>error</th> <th>t-statistic</th> <th>p-value</th> </tr> </thead> <tbody> <tr> <td>1</td> <td>CO<sub>2aer</sub></td> <td>0.00</td> <td>0.00</td> <td>0.55</td> <td>0.29</td> </tr> <tr> <td>2</td> <td>CO<sub>2off</sub></td> <td>0.10</td> <td>0.19</td> <td>0.55</td> <td>0.29</td> </tr> <tr> <td>3</td> <td>COD<sub>in</sub></td> <td>-</td> <td>0.00</td> <td>-</td> <td>0.50</td> </tr> <tr> <td>4</td> <td>N<sub>2</sub>O<sub>off</sub></td> <td>0.01</td> <td>0.02</td> <td>0.55</td> <td>0.29</td> </tr> <tr> <td>5</td> <td>NH<sub>eff</sub></td> <td>0.36</td> <td>0.66</td> <td>0.55</td> <td>0.29</td> </tr> <tr> <td>6</td> <td>NH<sub>in</sub></td> <td>1.97</td> <td>3.60</td> <td>0.55</td> <td>0.29</td> </tr> <tr> <td>7</td> <td>NO<sub>2eff</sub></td> <td>0.58</td> <td>1.05</td> <td>0.55</td> <td>0.29</td> </tr> <tr> <td>8</td> <td>NO<sub>off</sub></td> <td>0.00</td> <td>0.00</td> <td>0.55</td> <td>0.29</td> </tr> <tr> <td>9</td> <td>O<sub>2aer</sub></td> <td>0.00</td> <td>0.00</td> <td>0.55</td> <td>0.29</td> </tr> <tr> <td>10</td> <td>O<sub>2off</sub></td> <td>0.00</td> <td>0.00</td> <td>0.55</td> <td>0.29</td> </tr> <tr> <td>11</td> <td>Q<sub>aer</sub></td> <td>0.21</td> <td>0.37</td> <td>0.55</td> <td>0.29</td> </tr> <tr> <td>12</td> <td>Q<sub>in</sub></td> <td>-</td> <td>0.00</td> <td>-</td> <td>0.50</td> </tr> </tbody> </table> | #        | Var         | residual    | error       | t-statistic | p-value | 1     | CO <sub>2aer</sub> | 0.00 | 0.00 | 0.55 | 0.29 | 2 | CO <sub>2off</sub> | 0.10 | 0.19 | 0.55 | 0.29 | 3 | COD <sub>in</sub> | - | 0.00 | - | 0.50 | 4 | N <sub>2</sub> O <sub>off</sub> | 0.01 | 0.02 | 0.55 | 0.29 | 5 | NH <sub>eff</sub> | 0.36 | 0.66 | 0.55 | 0.29 | 6 | NH <sub>in</sub> | 1.97 | 3.60 | 0.55 | 0.29 | 7 | NO <sub>2eff</sub> | 0.58 | 1.05 | 0.55 | 0.29 | 8 | NO <sub>off</sub> | 0.00 | 0.00 | 0.55 | 0.29 | 9 | O <sub>2aer</sub> | 0.00 | 0.00 | 0.55 | 0.29 | 10 | O <sub>2off</sub> | 0.00 | 0.00 | 0.55 | 0.29 | 11 | Q <sub>aer</sub> | 0.21 | 0.37 | 0.55 | 0.29 | 12 | Q <sub>in</sub> | - | 0.00 | - | 0.50 |
| #                                                                                                                         | Var                                                                                                                                                                                                                                                                                                                                                                                                                                                                                                                                                                                                                                                                                                                                                                                                                                                                                                                                                                                                                                                                                                                                                                                                                                                                                                                                                                                                                                                                       | residual | error       | t-statistic | p-value     |             |         |       |                    |      |      |      |      |   |                    |      |      |      |      |   |                   |   |      |   |      |   |                                 |      |      |      |      |   |                   |      |      |      |      |   |                  |      |      |      |      |   |                    |      |      |      |      |   |                   |      |      |      |      |   |                   |      |      |      |      |    |                   |      |      |      |      |    |                  |      |      |      |      |    |                 |   |      |   |      |
| 1                                                                                                                         | CO <sub>2aer</sub>                                                                                                                                                                                                                                                                                                                                                                                                                                                                                                                                                                                                                                                                                                                                                                                                                                                                                                                                                                                                                                                                                                                                                                                                                                                                                                                                                                                                                                                        | 0.00     | 0.00        | 0.55        | 0.29        |             |         |       |                    |      |      |      |      |   |                    |      |      |      |      |   |                   |   |      |   |      |   |                                 |      |      |      |      |   |                   |      |      |      |      |   |                  |      |      |      |      |   |                    |      |      |      |      |   |                   |      |      |      |      |   |                   |      |      |      |      |    |                   |      |      |      |      |    |                  |      |      |      |      |    |                 |   |      |   |      |
| 2                                                                                                                         | CO <sub>2off</sub>                                                                                                                                                                                                                                                                                                                                                                                                                                                                                                                                                                                                                                                                                                                                                                                                                                                                                                                                                                                                                                                                                                                                                                                                                                                                                                                                                                                                                                                        | 0.10     | 0.19        | 0.55        | 0.29        |             |         |       |                    |      |      |      |      |   |                    |      |      |      |      |   |                   |   |      |   |      |   |                                 |      |      |      |      |   |                   |      |      |      |      |   |                  |      |      |      |      |   |                    |      |      |      |      |   |                   |      |      |      |      |   |                   |      |      |      |      |    |                   |      |      |      |      |    |                  |      |      |      |      |    |                 |   |      |   |      |
| 3                                                                                                                         | COD <sub>in</sub>                                                                                                                                                                                                                                                                                                                                                                                                                                                                                                                                                                                                                                                                                                                                                                                                                                                                                                                                                                                                                                                                                                                                                                                                                                                                                                                                                                                                                                                         | -        | 0.00        | -           | 0.50        |             |         |       |                    |      |      |      |      |   |                    |      |      |      |      |   |                   |   |      |   |      |   |                                 |      |      |      |      |   |                   |      |      |      |      |   |                  |      |      |      |      |   |                    |      |      |      |      |   |                   |      |      |      |      |   |                   |      |      |      |      |    |                   |      |      |      |      |    |                  |      |      |      |      |    |                 |   |      |   |      |
| 4                                                                                                                         | N <sub>2</sub> O <sub>off</sub>                                                                                                                                                                                                                                                                                                                                                                                                                                                                                                                                                                                                                                                                                                                                                                                                                                                                                                                                                                                                                                                                                                                                                                                                                                                                                                                                                                                                                                           | 0.01     | 0.02        | 0.55        | 0.29        |             |         |       |                    |      |      |      |      |   |                    |      |      |      |      |   |                   |   |      |   |      |   |                                 |      |      |      |      |   |                   |      |      |      |      |   |                  |      |      |      |      |   |                    |      |      |      |      |   |                   |      |      |      |      |   |                   |      |      |      |      |    |                   |      |      |      |      |    |                  |      |      |      |      |    |                 |   |      |   |      |
| 5                                                                                                                         | NH <sub>eff</sub>                                                                                                                                                                                                                                                                                                                                                                                                                                                                                                                                                                                                                                                                                                                                                                                                                                                                                                                                                                                                                                                                                                                                                                                                                                                                                                                                                                                                                                                         | 0.36     | 0.66        | 0.55        | 0.29        |             |         |       |                    |      |      |      |      |   |                    |      |      |      |      |   |                   |   |      |   |      |   |                                 |      |      |      |      |   |                   |      |      |      |      |   |                  |      |      |      |      |   |                    |      |      |      |      |   |                   |      |      |      |      |   |                   |      |      |      |      |    |                   |      |      |      |      |    |                  |      |      |      |      |    |                 |   |      |   |      |
| 6                                                                                                                         | NH <sub>in</sub>                                                                                                                                                                                                                                                                                                                                                                                                                                                                                                                                                                                                                                                                                                                                                                                                                                                                                                                                                                                                                                                                                                                                                                                                                                                                                                                                                                                                                                                          | 1.97     | 3.60        | 0.55        | 0.29        |             |         |       |                    |      |      |      |      |   |                    |      |      |      |      |   |                   |   |      |   |      |   |                                 |      |      |      |      |   |                   |      |      |      |      |   |                  |      |      |      |      |   |                    |      |      |      |      |   |                   |      |      |      |      |   |                   |      |      |      |      |    |                   |      |      |      |      |    |                  |      |      |      |      |    |                 |   |      |   |      |
| 7                                                                                                                         | NO <sub>2eff</sub>                                                                                                                                                                                                                                                                                                                                                                                                                                                                                                                                                                                                                                                                                                                                                                                                                                                                                                                                                                                                                                                                                                                                                                                                                                                                                                                                                                                                                                                        | 0.58     | 1.05        | 0.55        | 0.29        |             |         |       |                    |      |      |      |      |   |                    |      |      |      |      |   |                   |   |      |   |      |   |                                 |      |      |      |      |   |                   |      |      |      |      |   |                  |      |      |      |      |   |                    |      |      |      |      |   |                   |      |      |      |      |   |                   |      |      |      |      |    |                   |      |      |      |      |    |                  |      |      |      |      |    |                 |   |      |   |      |
| 8                                                                                                                         | NO <sub>off</sub>                                                                                                                                                                                                                                                                                                                                                                                                                                                                                                                                                                                                                                                                                                                                                                                                                                                                                                                                                                                                                                                                                                                                                                                                                                                                                                                                                                                                                                                         | 0.00     | 0.00        | 0.55        | 0.29        |             |         |       |                    |      |      |      |      |   |                    |      |      |      |      |   |                   |   |      |   |      |   |                                 |      |      |      |      |   |                   |      |      |      |      |   |                  |      |      |      |      |   |                    |      |      |      |      |   |                   |      |      |      |      |   |                   |      |      |      |      |    |                   |      |      |      |      |    |                  |      |      |      |      |    |                 |   |      |   |      |
| 9                                                                                                                         | O <sub>2aer</sub>                                                                                                                                                                                                                                                                                                                                                                                                                                                                                                                                                                                                                                                                                                                                                                                                                                                                                                                                                                                                                                                                                                                                                                                                                                                                                                                                                                                                                                                         | 0.00     | 0.00        | 0.55        | 0.29        |             |         |       |                    |      |      |      |      |   |                    |      |      |      |      |   |                   |   |      |   |      |   |                                 |      |      |      |      |   |                   |      |      |      |      |   |                  |      |      |      |      |   |                    |      |      |      |      |   |                   |      |      |      |      |   |                   |      |      |      |      |    |                   |      |      |      |      |    |                  |      |      |      |      |    |                 |   |      |   |      |
| 10                                                                                                                        | O <sub>2off</sub>                                                                                                                                                                                                                                                                                                                                                                                                                                                                                                                                                                                                                                                                                                                                                                                                                                                                                                                                                                                                                                                                                                                                                                                                                                                                                                                                                                                                                                                         | 0.00     | 0.00        | 0.55        | 0.29        |             |         |       |                    |      |      |      |      |   |                    |      |      |      |      |   |                   |   |      |   |      |   |                                 |      |      |      |      |   |                   |      |      |      |      |   |                  |      |      |      |      |   |                    |      |      |      |      |   |                   |      |      |      |      |   |                   |      |      |      |      |    |                   |      |      |      |      |    |                  |      |      |      |      |    |                 |   |      |   |      |
| 11                                                                                                                        | Q <sub>aer</sub>                                                                                                                                                                                                                                                                                                                                                                                                                                                                                                                                                                                                                                                                                                                                                                                                                                                                                                                                                                                                                                                                                                                                                                                                                                                                                                                                                                                                                                                          | 0.21     | 0.37        | 0.55        | 0.29        |             |         |       |                    |      |      |      |      |   |                    |      |      |      |      |   |                   |   |      |   |      |   |                                 |      |      |      |      |   |                   |      |      |      |      |   |                  |      |      |      |      |   |                    |      |      |      |      |   |                   |      |      |      |      |   |                   |      |      |      |      |    |                   |      |      |      |      |    |                  |      |      |      |      |    |                 |   |      |   |      |
| 12                                                                                                                        | Q <sub>in</sub>                                                                                                                                                                                                                                                                                                                                                                                                                                                                                                                                                                                                                                                                                                                                                                                                                                                                                                                                                                                                                                                                                                                                                                                                                                                                                                                                                                                                                                                           | -        | 0.00        | -           | 0.50        |             |         |       |                    |      |      |      |      |   |                    |      |      |      |      |   |                   |   |      |   |      |   |                                 |      |      |      |      |   |                   |      |      |      |      |   |                  |      |      |      |      |   |                    |      |      |      |      |   |                   |      |      |      |      |   |                   |      |      |      |      |    |                   |      |      |      |      |    |                  |      |      |      |      |    |                 |   |      |   |      |
| <b>Nodal test</b><br>Degree of freedom = 1<br>t-statistic <sub>max</sub> = 1.96<br>p-value <sub>min</sub> = 0.03          | no gross error detected                                                                                                                                                                                                                                                                                                                                                                                                                                                                                                                                                                                                                                                                                                                                                                                                                                                                                                                                                                                                                                                                                                                                                                                                                                                                                                                                                                                                                                                   |          |             |             |             |             |         |       |                    |      |      |      |      |   |                    |      |      |      |      |   |                   |   |      |   |      |   |                                 |      |      |      |      |   |                   |      |      |      |      |   |                  |      |      |      |      |   |                    |      |      |      |      |   |                   |      |      |      |      |   |                   |      |      |      |      |    |                   |      |      |      |      |    |                  |      |      |      |      |    |                 |   |      |   |      |
|                                                                                                                           | <table border="1"> <thead> <tr> <th>#</th> <th>misbalance</th> <th>error</th> <th>t-statistic</th> <th>p-value</th> </tr> </thead> <tbody> <tr> <td>1</td> <td>6,188</td> <td>11,280</td> <td>0.55</td> <td>0.29</td> </tr> </tbody> </table>                                                                                                                                                                                                                                                                                                                                                                                                                                                                                                                                                                                                                                                                                                                                                                                                                                                                                                                                                                                                                                                                                                                                                                                                                             | #        | misbalance  | error       | t-statistic | p-value     | 1       | 6,188 | 11,280             | 0.55 | 0.29 |      |      |   |                    |      |      |      |      |   |                   |   |      |   |      |   |                                 |      |      |      |      |   |                   |      |      |      |      |   |                  |      |      |      |      |   |                    |      |      |      |      |   |                   |      |      |      |      |   |                   |      |      |      |      |    |                   |      |      |      |      |    |                  |      |      |      |      |    |                 |   |      |   |      |
| #                                                                                                                         | misbalance                                                                                                                                                                                                                                                                                                                                                                                                                                                                                                                                                                                                                                                                                                                                                                                                                                                                                                                                                                                                                                                                                                                                                                                                                                                                                                                                                                                                                                                                | error    | t-statistic | p-value     |             |             |         |       |                    |      |      |      |      |   |                    |      |      |      |      |   |                   |   |      |   |      |   |                                 |      |      |      |      |   |                   |      |      |      |      |   |                  |      |      |      |      |   |                    |      |      |      |      |   |                   |      |      |      |      |   |                   |      |      |      |      |    |                   |      |      |      |      |    |                  |      |      |      |      |    |                 |   |      |   |      |
| 1                                                                                                                         | 6,188                                                                                                                                                                                                                                                                                                                                                                                                                                                                                                                                                                                                                                                                                                                                                                                                                                                                                                                                                                                                                                                                                                                                                                                                                                                                                                                                                                                                                                                                     | 11,280   | 0.55        | 0.29        |             |             |         |       |                    |      |      |      |      |   |                    |      |      |      |      |   |                   |   |      |   |      |   |                                 |      |      |      |      |   |                   |      |      |      |      |   |                  |      |      |      |      |   |                    |      |      |      |      |   |                   |      |      |      |      |   |                   |      |      |      |      |    |                   |      |      |      |      |    |                  |      |      |      |      |    |                 |   |      |   |      |

## Results for S5

Table B5a. Data reconciliation (iteration = 4, convergence tolerance =  $1.6 \times 10^{-07}$ , CPU time = 0.7s)

| #  | Var                             | measured   | std  | sD%  | reconciled | std  | sD%   | $\Delta(\%)$ | i(%)  |   |   |
|----|---------------------------------|------------|------|------|------------|------|-------|--------------|-------|---|---|
| 1  | CO <sub>2aer</sub>              | 494        | 3    | 0.65 | 494        | 3    | 0.65  | 100.00       | 0.00  | M | I |
| 2  | CO <sub>2off</sub>              | 22,551     | 253  | 1.12 | 22,551     | 253  | 1.12  | 100.00       | 0.00  | M | I |
| 3  | COD <sub>in</sub>               | 2.78       | 0.01 | 0.36 | 2.78       | 0.01 | 0.36  | 100.00       | 0.00  | M | I |
| 4  | N <sub>2</sub> O <sub>off</sub> | 309        | 7    | 2.12 | 309        | 7    | 2.12  | 100.01       | 0.00  | M | I |
| 5  | NH <sub>eff</sub>               | 35.5       | 1.8  | 5.00 | 35.8       | 1.7  | 4.64  | 100.86       | 6.50  | M | I |
| 6  | NH <sub>in</sub>                | 82.6       | 4.1  | 5.00 | 80.9       | 2.3  | 2.89  | 97.99        | 43.44 | M | I |
| 7  | NO <sub>2eff</sub>              | 45.0       | 2.3  | 5.00 | 45.5       | 2.0  | 4.44  | 101.07       | 10.23 | M | I |
| 8  | NO <sub>3eff</sub>              | 0.5        | 0.0  | 5.00 | 0.5        | 0.0  | 5.00  | 100.01       | 0.00  | M | I |
| 9  | NO <sub>off</sub>               | 31         | 0    | 1.43 | 31         | 0    | 1.43  | 100.00       | 0.00  | M | I |
| 10 | O <sub>2aer</sub>               | 210,702    | 11   | 0.01 | 210,702    | 11   | 0.01  | 100.00       | 0.00  | M | I |
| 11 | O <sub>2off</sub>               | 193,806    | 181  | 0.09 | 193,806    | 181  | 0.09  | 100.00       | 0.00  | M | I |
| 12 | Q <sub>aer</sub>                | 1,682      | 30   | 2    | 1,682      | 30   | 1.80  | 100.00       | 0.00  | M | I |
| 13 | Q <sub>in</sub>                 | 25.63      | 0.03 | 0.11 | 25.63      | 0.03 | 0.11  | 100.00       | 0.00  | M | I |
| #  | Var                             | calculated | std  | sD%  | reconciled | std  | sD%   | $\Delta(\%)$ | i(%)  |   |   |
| 14 | Q <sub>inf</sub>                | 1,023      | 141  | 14   | 1,033      | 128  | 12.36 | 100.93       | 9.32  | U | I |
| 15 | Q <sub>off</sub>                | 2,839      | 145  | 5    | 2,869      | 131  | 4.58  | 101.04       | 9.14  | U | I |
| 16 | (TIC:NH) <sub>in</sub>          | 1.14       | 0.08 | 7    | 1.18       | 0.04 | 3.71  | 103.13       | 47.71 | U | I |

Table B5b. Gross error detection

| Test                                                                                                | Evaluation                                                                                                                                                                                                                                                                                                                                                                                                                                                                                                                                                                                                                                                                                                                                                                                                                                                                                                                                                                                                                                                                                                                                                                                                                                                                                                                                                                                                                                                                |          |             |             |             |             |         |       |                    |      |      |      |      |   |                    |      |      |      |      |   |                   |   |      |   |      |   |                                 |      |      |      |      |   |                   |      |      |      |      |   |                  |      |      |      |      |   |                    |      |      |      |      |   |                   |      |      |      |      |   |                   |      |      |      |      |    |                   |      |      |      |      |    |                  |      |      |      |      |    |                 |   |      |   |      |
|-----------------------------------------------------------------------------------------------------|---------------------------------------------------------------------------------------------------------------------------------------------------------------------------------------------------------------------------------------------------------------------------------------------------------------------------------------------------------------------------------------------------------------------------------------------------------------------------------------------------------------------------------------------------------------------------------------------------------------------------------------------------------------------------------------------------------------------------------------------------------------------------------------------------------------------------------------------------------------------------------------------------------------------------------------------------------------------------------------------------------------------------------------------------------------------------------------------------------------------------------------------------------------------------------------------------------------------------------------------------------------------------------------------------------------------------------------------------------------------------------------------------------------------------------------------------------------------------|----------|-------------|-------------|-------------|-------------|---------|-------|--------------------|------|------|------|------|---|--------------------|------|------|------|------|---|-------------------|---|------|---|------|---|---------------------------------|------|------|------|------|---|-------------------|------|------|------|------|---|------------------|------|------|------|------|---|--------------------|------|------|------|------|---|-------------------|------|------|------|------|---|-------------------|------|------|------|------|----|-------------------|------|------|------|------|----|------------------|------|------|------|------|----|-----------------|---|------|---|------|
| <b>Global test</b>                                                                                  | no gross error detected                                                                                                                                                                                                                                                                                                                                                                                                                                                                                                                                                                                                                                                                                                                                                                                                                                                                                                                                                                                                                                                                                                                                                                                                                                                                                                                                                                                                                                                   |          |             |             |             |             |         |       |                    |      |      |      |      |   |                    |      |      |      |      |   |                   |   |      |   |      |   |                                 |      |      |      |      |   |                   |      |      |      |      |   |                  |      |      |      |      |   |                    |      |      |      |      |   |                   |      |      |      |      |   |                   |      |      |      |      |    |                   |      |      |      |      |    |                  |      |      |      |      |    |                 |   |      |   |      |
| System degree of redundancy = 1<br>t-statistic = 2.62, $\chi^2_{1-0.05,1} = 3.84$<br>p-value = 0.11 |                                                                                                                                                                                                                                                                                                                                                                                                                                                                                                                                                                                                                                                                                                                                                                                                                                                                                                                                                                                                                                                                                                                                                                                                                                                                                                                                                                                                                                                                           |          |             |             |             |             |         |       |                    |      |      |      |      |   |                    |      |      |      |      |   |                   |   |      |   |      |   |                                 |      |      |      |      |   |                   |      |      |      |      |   |                  |      |      |      |      |   |                    |      |      |      |      |   |                   |      |      |      |      |   |                   |      |      |      |      |    |                   |      |      |      |      |    |                  |      |      |      |      |    |                 |   |      |   |      |
| <b>Measurement test</b>                                                                             | no gross error detected                                                                                                                                                                                                                                                                                                                                                                                                                                                                                                                                                                                                                                                                                                                                                                                                                                                                                                                                                                                                                                                                                                                                                                                                                                                                                                                                                                                                                                                   |          |             |             |             |             |         |       |                    |      |      |      |      |   |                    |      |      |      |      |   |                   |   |      |   |      |   |                                 |      |      |      |      |   |                   |      |      |      |      |   |                  |      |      |      |      |   |                    |      |      |      |      |   |                   |      |      |      |      |   |                   |      |      |      |      |    |                   |      |      |      |      |    |                  |      |      |      |      |    |                 |   |      |   |      |
| Degree of freedom = 1<br>t-statistic <sub>max</sub> = 1.96<br>p-value <sub>min</sub> = 0.03         |                                                                                                                                                                                                                                                                                                                                                                                                                                                                                                                                                                                                                                                                                                                                                                                                                                                                                                                                                                                                                                                                                                                                                                                                                                                                                                                                                                                                                                                                           |          |             |             |             |             |         |       |                    |      |      |      |      |   |                    |      |      |      |      |   |                   |   |      |   |      |   |                                 |      |      |      |      |   |                   |      |      |      |      |   |                  |      |      |      |      |   |                    |      |      |      |      |   |                   |      |      |      |      |   |                   |      |      |      |      |    |                   |      |      |      |      |    |                  |      |      |      |      |    |                 |   |      |   |      |
|                                                                                                     | <table border="1"> <thead> <tr> <th>#</th> <th>Var</th> <th>residual</th> <th>error</th> <th>t-statistic</th> <th>p-value</th> </tr> </thead> <tbody> <tr> <td>1</td> <td>CO<sub>2aer</sub></td> <td>0.00</td> <td>0.00</td> <td>0.49</td> <td>0.31</td> </tr> <tr> <td>2</td> <td>CO<sub>2off</sub></td> <td>0.16</td> <td>0.32</td> <td>0.49</td> <td>0.31</td> </tr> <tr> <td>3</td> <td>COD<sub>in</sub></td> <td>-</td> <td>0.00</td> <td>-</td> <td>0.50</td> </tr> <tr> <td>4</td> <td>N<sub>2</sub>O<sub>off</sub></td> <td>0.02</td> <td>0.04</td> <td>0.49</td> <td>0.31</td> </tr> <tr> <td>5</td> <td>NH<sub>eff</sub></td> <td>0.31</td> <td>0.63</td> <td>0.49</td> <td>0.31</td> </tr> <tr> <td>6</td> <td>NH<sub>in</sub></td> <td>1.66</td> <td>3.40</td> <td>0.49</td> <td>0.31</td> </tr> <tr> <td>7</td> <td>NO<sub>2eff</sub></td> <td>0.48</td> <td>0.99</td> <td>0.49</td> <td>0.31</td> </tr> <tr> <td>8</td> <td>NO<sub>off</sub></td> <td>0.00</td> <td>0.00</td> <td>0.49</td> <td>0.31</td> </tr> <tr> <td>9</td> <td>O<sub>2aer</sub></td> <td>0.00</td> <td>0.00</td> <td>0.49</td> <td>0.31</td> </tr> <tr> <td>10</td> <td>O<sub>2off</sub></td> <td>0.00</td> <td>0.00</td> <td>0.49</td> <td>0.31</td> </tr> <tr> <td>11</td> <td>Q<sub>aer</sub></td> <td>0.38</td> <td>0.78</td> <td>0.49</td> <td>0.31</td> </tr> <tr> <td>12</td> <td>Q<sub>in</sub></td> <td>-</td> <td>0.00</td> <td>-</td> <td>0.50</td> </tr> </tbody> </table> | #        | Var         | residual    | error       | t-statistic | p-value | 1     | CO <sub>2aer</sub> | 0.00 | 0.00 | 0.49 | 0.31 | 2 | CO <sub>2off</sub> | 0.16 | 0.32 | 0.49 | 0.31 | 3 | COD <sub>in</sub> | - | 0.00 | - | 0.50 | 4 | N <sub>2</sub> O <sub>off</sub> | 0.02 | 0.04 | 0.49 | 0.31 | 5 | NH <sub>eff</sub> | 0.31 | 0.63 | 0.49 | 0.31 | 6 | NH <sub>in</sub> | 1.66 | 3.40 | 0.49 | 0.31 | 7 | NO <sub>2eff</sub> | 0.48 | 0.99 | 0.49 | 0.31 | 8 | NO <sub>off</sub> | 0.00 | 0.00 | 0.49 | 0.31 | 9 | O <sub>2aer</sub> | 0.00 | 0.00 | 0.49 | 0.31 | 10 | O <sub>2off</sub> | 0.00 | 0.00 | 0.49 | 0.31 | 11 | Q <sub>aer</sub> | 0.38 | 0.78 | 0.49 | 0.31 | 12 | Q <sub>in</sub> | - | 0.00 | - | 0.50 |
| #                                                                                                   | Var                                                                                                                                                                                                                                                                                                                                                                                                                                                                                                                                                                                                                                                                                                                                                                                                                                                                                                                                                                                                                                                                                                                                                                                                                                                                                                                                                                                                                                                                       | residual | error       | t-statistic | p-value     |             |         |       |                    |      |      |      |      |   |                    |      |      |      |      |   |                   |   |      |   |      |   |                                 |      |      |      |      |   |                   |      |      |      |      |   |                  |      |      |      |      |   |                    |      |      |      |      |   |                   |      |      |      |      |   |                   |      |      |      |      |    |                   |      |      |      |      |    |                  |      |      |      |      |    |                 |   |      |   |      |
| 1                                                                                                   | CO <sub>2aer</sub>                                                                                                                                                                                                                                                                                                                                                                                                                                                                                                                                                                                                                                                                                                                                                                                                                                                                                                                                                                                                                                                                                                                                                                                                                                                                                                                                                                                                                                                        | 0.00     | 0.00        | 0.49        | 0.31        |             |         |       |                    |      |      |      |      |   |                    |      |      |      |      |   |                   |   |      |   |      |   |                                 |      |      |      |      |   |                   |      |      |      |      |   |                  |      |      |      |      |   |                    |      |      |      |      |   |                   |      |      |      |      |   |                   |      |      |      |      |    |                   |      |      |      |      |    |                  |      |      |      |      |    |                 |   |      |   |      |
| 2                                                                                                   | CO <sub>2off</sub>                                                                                                                                                                                                                                                                                                                                                                                                                                                                                                                                                                                                                                                                                                                                                                                                                                                                                                                                                                                                                                                                                                                                                                                                                                                                                                                                                                                                                                                        | 0.16     | 0.32        | 0.49        | 0.31        |             |         |       |                    |      |      |      |      |   |                    |      |      |      |      |   |                   |   |      |   |      |   |                                 |      |      |      |      |   |                   |      |      |      |      |   |                  |      |      |      |      |   |                    |      |      |      |      |   |                   |      |      |      |      |   |                   |      |      |      |      |    |                   |      |      |      |      |    |                  |      |      |      |      |    |                 |   |      |   |      |
| 3                                                                                                   | COD <sub>in</sub>                                                                                                                                                                                                                                                                                                                                                                                                                                                                                                                                                                                                                                                                                                                                                                                                                                                                                                                                                                                                                                                                                                                                                                                                                                                                                                                                                                                                                                                         | -        | 0.00        | -           | 0.50        |             |         |       |                    |      |      |      |      |   |                    |      |      |      |      |   |                   |   |      |   |      |   |                                 |      |      |      |      |   |                   |      |      |      |      |   |                  |      |      |      |      |   |                    |      |      |      |      |   |                   |      |      |      |      |   |                   |      |      |      |      |    |                   |      |      |      |      |    |                  |      |      |      |      |    |                 |   |      |   |      |
| 4                                                                                                   | N <sub>2</sub> O <sub>off</sub>                                                                                                                                                                                                                                                                                                                                                                                                                                                                                                                                                                                                                                                                                                                                                                                                                                                                                                                                                                                                                                                                                                                                                                                                                                                                                                                                                                                                                                           | 0.02     | 0.04        | 0.49        | 0.31        |             |         |       |                    |      |      |      |      |   |                    |      |      |      |      |   |                   |   |      |   |      |   |                                 |      |      |      |      |   |                   |      |      |      |      |   |                  |      |      |      |      |   |                    |      |      |      |      |   |                   |      |      |      |      |   |                   |      |      |      |      |    |                   |      |      |      |      |    |                  |      |      |      |      |    |                 |   |      |   |      |
| 5                                                                                                   | NH <sub>eff</sub>                                                                                                                                                                                                                                                                                                                                                                                                                                                                                                                                                                                                                                                                                                                                                                                                                                                                                                                                                                                                                                                                                                                                                                                                                                                                                                                                                                                                                                                         | 0.31     | 0.63        | 0.49        | 0.31        |             |         |       |                    |      |      |      |      |   |                    |      |      |      |      |   |                   |   |      |   |      |   |                                 |      |      |      |      |   |                   |      |      |      |      |   |                  |      |      |      |      |   |                    |      |      |      |      |   |                   |      |      |      |      |   |                   |      |      |      |      |    |                   |      |      |      |      |    |                  |      |      |      |      |    |                 |   |      |   |      |
| 6                                                                                                   | NH <sub>in</sub>                                                                                                                                                                                                                                                                                                                                                                                                                                                                                                                                                                                                                                                                                                                                                                                                                                                                                                                                                                                                                                                                                                                                                                                                                                                                                                                                                                                                                                                          | 1.66     | 3.40        | 0.49        | 0.31        |             |         |       |                    |      |      |      |      |   |                    |      |      |      |      |   |                   |   |      |   |      |   |                                 |      |      |      |      |   |                   |      |      |      |      |   |                  |      |      |      |      |   |                    |      |      |      |      |   |                   |      |      |      |      |   |                   |      |      |      |      |    |                   |      |      |      |      |    |                  |      |      |      |      |    |                 |   |      |   |      |
| 7                                                                                                   | NO <sub>2eff</sub>                                                                                                                                                                                                                                                                                                                                                                                                                                                                                                                                                                                                                                                                                                                                                                                                                                                                                                                                                                                                                                                                                                                                                                                                                                                                                                                                                                                                                                                        | 0.48     | 0.99        | 0.49        | 0.31        |             |         |       |                    |      |      |      |      |   |                    |      |      |      |      |   |                   |   |      |   |      |   |                                 |      |      |      |      |   |                   |      |      |      |      |   |                  |      |      |      |      |   |                    |      |      |      |      |   |                   |      |      |      |      |   |                   |      |      |      |      |    |                   |      |      |      |      |    |                  |      |      |      |      |    |                 |   |      |   |      |
| 8                                                                                                   | NO <sub>off</sub>                                                                                                                                                                                                                                                                                                                                                                                                                                                                                                                                                                                                                                                                                                                                                                                                                                                                                                                                                                                                                                                                                                                                                                                                                                                                                                                                                                                                                                                         | 0.00     | 0.00        | 0.49        | 0.31        |             |         |       |                    |      |      |      |      |   |                    |      |      |      |      |   |                   |   |      |   |      |   |                                 |      |      |      |      |   |                   |      |      |      |      |   |                  |      |      |      |      |   |                    |      |      |      |      |   |                   |      |      |      |      |   |                   |      |      |      |      |    |                   |      |      |      |      |    |                  |      |      |      |      |    |                 |   |      |   |      |
| 9                                                                                                   | O <sub>2aer</sub>                                                                                                                                                                                                                                                                                                                                                                                                                                                                                                                                                                                                                                                                                                                                                                                                                                                                                                                                                                                                                                                                                                                                                                                                                                                                                                                                                                                                                                                         | 0.00     | 0.00        | 0.49        | 0.31        |             |         |       |                    |      |      |      |      |   |                    |      |      |      |      |   |                   |   |      |   |      |   |                                 |      |      |      |      |   |                   |      |      |      |      |   |                  |      |      |      |      |   |                    |      |      |      |      |   |                   |      |      |      |      |   |                   |      |      |      |      |    |                   |      |      |      |      |    |                  |      |      |      |      |    |                 |   |      |   |      |
| 10                                                                                                  | O <sub>2off</sub>                                                                                                                                                                                                                                                                                                                                                                                                                                                                                                                                                                                                                                                                                                                                                                                                                                                                                                                                                                                                                                                                                                                                                                                                                                                                                                                                                                                                                                                         | 0.00     | 0.00        | 0.49        | 0.31        |             |         |       |                    |      |      |      |      |   |                    |      |      |      |      |   |                   |   |      |   |      |   |                                 |      |      |      |      |   |                   |      |      |      |      |   |                  |      |      |      |      |   |                    |      |      |      |      |   |                   |      |      |      |      |   |                   |      |      |      |      |    |                   |      |      |      |      |    |                  |      |      |      |      |    |                 |   |      |   |      |
| 11                                                                                                  | Q <sub>aer</sub>                                                                                                                                                                                                                                                                                                                                                                                                                                                                                                                                                                                                                                                                                                                                                                                                                                                                                                                                                                                                                                                                                                                                                                                                                                                                                                                                                                                                                                                          | 0.38     | 0.78        | 0.49        | 0.31        |             |         |       |                    |      |      |      |      |   |                    |      |      |      |      |   |                   |   |      |   |      |   |                                 |      |      |      |      |   |                   |      |      |      |      |   |                  |      |      |      |      |   |                    |      |      |      |      |   |                   |      |      |      |      |   |                   |      |      |      |      |    |                   |      |      |      |      |    |                  |      |      |      |      |    |                 |   |      |   |      |
| 12                                                                                                  | Q <sub>in</sub>                                                                                                                                                                                                                                                                                                                                                                                                                                                                                                                                                                                                                                                                                                                                                                                                                                                                                                                                                                                                                                                                                                                                                                                                                                                                                                                                                                                                                                                           | -        | 0.00        | -           | 0.50        |             |         |       |                    |      |      |      |      |   |                    |      |      |      |      |   |                   |   |      |   |      |   |                                 |      |      |      |      |   |                   |      |      |      |      |   |                  |      |      |      |      |   |                    |      |      |      |      |   |                   |      |      |      |      |   |                   |      |      |      |      |    |                   |      |      |      |      |    |                  |      |      |      |      |    |                 |   |      |   |      |
| <b>Nodal test</b>                                                                                   | no gross error detected                                                                                                                                                                                                                                                                                                                                                                                                                                                                                                                                                                                                                                                                                                                                                                                                                                                                                                                                                                                                                                                                                                                                                                                                                                                                                                                                                                                                                                                   |          |             |             |             |             |         |       |                    |      |      |      |      |   |                    |      |      |      |      |   |                   |   |      |   |      |   |                                 |      |      |      |      |   |                   |      |      |      |      |   |                  |      |      |      |      |   |                    |      |      |      |      |   |                   |      |      |      |      |   |                   |      |      |      |      |    |                   |      |      |      |      |    |                  |      |      |      |      |    |                 |   |      |   |      |
| Degree of freedom = 1<br>t-statistic <sub>max</sub> = 1.96<br>p-value <sub>min</sub> = 0.03         |                                                                                                                                                                                                                                                                                                                                                                                                                                                                                                                                                                                                                                                                                                                                                                                                                                                                                                                                                                                                                                                                                                                                                                                                                                                                                                                                                                                                                                                                           |          |             |             |             |             |         |       |                    |      |      |      |      |   |                    |      |      |      |      |   |                   |   |      |   |      |   |                                 |      |      |      |      |   |                   |      |      |      |      |   |                  |      |      |      |      |   |                    |      |      |      |      |   |                   |      |      |      |      |   |                   |      |      |      |      |    |                   |      |      |      |      |    |                  |      |      |      |      |    |                 |   |      |   |      |
|                                                                                                     | <table border="1"> <thead> <tr> <th>#</th> <th>misbalance</th> <th>error</th> <th>t-statistic</th> <th>p-value</th> </tr> </thead> <tbody> <tr> <td>1</td> <td>2,938</td> <td>6,026</td> <td>0.49</td> <td>0.31</td> </tr> </tbody> </table>                                                                                                                                                                                                                                                                                                                                                                                                                                                                                                                                                                                                                                                                                                                                                                                                                                                                                                                                                                                                                                                                                                                                                                                                                              | #        | misbalance  | error       | t-statistic | p-value     | 1       | 2,938 | 6,026              | 0.49 | 0.31 |      |      |   |                    |      |      |      |      |   |                   |   |      |   |      |   |                                 |      |      |      |      |   |                   |      |      |      |      |   |                  |      |      |      |      |   |                    |      |      |      |      |   |                   |      |      |      |      |   |                   |      |      |      |      |    |                   |      |      |      |      |    |                  |      |      |      |      |    |                 |   |      |   |      |
| #                                                                                                   | misbalance                                                                                                                                                                                                                                                                                                                                                                                                                                                                                                                                                                                                                                                                                                                                                                                                                                                                                                                                                                                                                                                                                                                                                                                                                                                                                                                                                                                                                                                                | error    | t-statistic | p-value     |             |             |         |       |                    |      |      |      |      |   |                    |      |      |      |      |   |                   |   |      |   |      |   |                                 |      |      |      |      |   |                   |      |      |      |      |   |                  |      |      |      |      |   |                    |      |      |      |      |   |                   |      |      |      |      |   |                   |      |      |      |      |    |                   |      |      |      |      |    |                  |      |      |      |      |    |                 |   |      |   |      |
| 1                                                                                                   | 2,938                                                                                                                                                                                                                                                                                                                                                                                                                                                                                                                                                                                                                                                                                                                                                                                                                                                                                                                                                                                                                                                                                                                                                                                                                                                                                                                                                                                                                                                                     | 6,026    | 0.49        | 0.31        |             |             |         |       |                    |      |      |      |      |   |                    |      |      |      |      |   |                   |   |      |   |      |   |                                 |      |      |      |      |   |                   |      |      |      |      |   |                  |      |      |      |      |   |                    |      |      |      |      |   |                   |      |      |      |      |   |                   |      |      |      |      |    |                   |      |      |      |      |    |                  |      |      |      |      |    |                 |   |      |   |      |

## Results for S6

Table B6a. Data reconciliation (iteration = 4, convergence tolerance =  $1.5 \times 10^{-07}$ , CPU time = 0.7s)

| #  | Var                             | measured   | std  | sD%  | reconciled | std  | sD%   | $\Delta(\%)$ | i(%)  | M | I |
|----|---------------------------------|------------|------|------|------------|------|-------|--------------|-------|---|---|
| 1  | CO <sub>2aer</sub>              | 539        | 16   | 2.96 | 539        | 16   | 2.96  | 100.00       | 0.00  | M | I |
| 2  | CO <sub>2off</sub>              | 7,490      | 299  | 3.99 | 7,495      | 299  | 3.98  | 100.07       | 0.01  | M | I |
| 3  | COD <sub>in</sub>               | 2.78       | 0.01 | 0.36 | 2.78       | 0.01 | 0.36  | 100.00       | 0.00  | M | I |
| 4  | N <sub>2</sub> O <sub>off</sub> | 263        | 12   | 4.71 | 263        | 12   | 4.70  | 100.24       | 0.06  | M | I |
| 5  | NH <sub>eff</sub>               | 42.0       | 2.1  | 5.00 | 43.0       | 2.0  | 4.58  | 102.54       | 6.02  | M | I |
| 6  | NH <sub>in</sub>                | 103.1      | 5.2  | 5.00 | 96.7       | 2.8  | 2.90  | 93.76        | 45.66 | M | I |
| 7  | NO <sub>2eff</sub>              | 49.9       | 2.5  | 5.00 | 51.4       | 2.3  | 4.40  | 103.11       | 9.18  | M | I |
| 8  | NO <sub>3eff</sub>              | 0.5        | 0.0  | 5.00 | 0.5        | 0.0  | 5.00  | 100.03       | 0.00  | M | I |
| 9  | NO <sub>off</sub>               | 8          | 0    | 5.40 | 8          | 0    | 5.40  | 100.01       | 0.00  | M | I |
| 10 | O <sub>2aer</sub>               | 210,758    | 19   | 0.01 | 210,758    | 19   | 0.01  | 100.00       | 0.00  | M | I |
| 11 | O <sub>2off</sub>               | 205,474    | 233  | 0.11 | 205,490    | 233  | 0.11  | 100.01       | 0.10  | M | I |
| 12 | Q <sub>aer</sub>                | 593        | 29   | 5    | 593        | 29   | 4.94  | 100.00       | 0.00  | M | I |
| 13 | Q <sub>in</sub>                 | 7.33       | 0.26 | 3.61 | 7.33       | 0.26 | 3.61  | 100.00       | 0.00  | M | I |
| #  | Var                             | calculated | std  | sD%  | reconciled | std  | sD%   | $\Delta(\%)$ | i(%)  | M | I |
| 14 | Q <sub>inf</sub>                | 2,263      | 259  | 11   | 2,354      | 257  | 10.93 | 104.00       | 0.83  | U | I |
| 15 | Q <sub>off</sub>                | 2,985      | 270  | 9    | 3,090      | 269  | 8.70  | 103.52       | 0.47  | U | I |
| 16 | (TIC:NH) <sub>in</sub>          | 1.06       | 0.12 | 11   | 1.17       | 0.10 | 8.96  | 110.51       | 11.29 | U | I |

Table B6b. Gross error detection

| Test                                                                                                                       | Evaluation                                                                                                                                                                                                                                                                                                                                                                                                                                                                                                                                                                                                                                                                                                                                                                                                                                                                                                                                                                                                                                                                                                                                                                                                                                                                                                                                                                                                                                                                  |          |             |             |             |             |         |       |                    |      |      |      |      |   |                    |      |      |      |      |   |                   |   |      |   |      |   |                                 |      |      |      |      |   |                   |      |      |      |      |   |                  |      |      |      |      |   |                    |      |      |      |      |   |                   |      |      |      |      |   |                   |      |      |      |      |    |                   |      |      |      |      |    |                  |       |       |      |      |    |                 |   |      |   |      |
|----------------------------------------------------------------------------------------------------------------------------|-----------------------------------------------------------------------------------------------------------------------------------------------------------------------------------------------------------------------------------------------------------------------------------------------------------------------------------------------------------------------------------------------------------------------------------------------------------------------------------------------------------------------------------------------------------------------------------------------------------------------------------------------------------------------------------------------------------------------------------------------------------------------------------------------------------------------------------------------------------------------------------------------------------------------------------------------------------------------------------------------------------------------------------------------------------------------------------------------------------------------------------------------------------------------------------------------------------------------------------------------------------------------------------------------------------------------------------------------------------------------------------------------------------------------------------------------------------------------------|----------|-------------|-------------|-------------|-------------|---------|-------|--------------------|------|------|------|------|---|--------------------|------|------|------|------|---|-------------------|---|------|---|------|---|---------------------------------|------|------|------|------|---|-------------------|------|------|------|------|---|------------------|------|------|------|------|---|--------------------|------|------|------|------|---|-------------------|------|------|------|------|---|-------------------|------|------|------|------|----|-------------------|------|------|------|------|----|------------------|-------|-------|------|------|----|-----------------|---|------|---|------|
| <b>Global test</b><br>System degree of redundancy = 1<br>t-statistic = 24.31, $\chi^2_{1-0.05,1} = 3.84$<br>p-value = 0.00 | Gross error detected                                                                                                                                                                                                                                                                                                                                                                                                                                                                                                                                                                                                                                                                                                                                                                                                                                                                                                                                                                                                                                                                                                                                                                                                                                                                                                                                                                                                                                                        |          |             |             |             |             |         |       |                    |      |      |      |      |   |                    |      |      |      |      |   |                   |   |      |   |      |   |                                 |      |      |      |      |   |                   |      |      |      |      |   |                  |      |      |      |      |   |                    |      |      |      |      |   |                   |      |      |      |      |   |                   |      |      |      |      |    |                   |      |      |      |      |    |                  |       |       |      |      |    |                 |   |      |   |      |
| <b>Measurement test</b><br>Degree of freedom = 1<br>t-statistic <sub>max</sub> = 1.96<br>p-value <sub>min</sub> = 0.03     | no gross error detected                                                                                                                                                                                                                                                                                                                                                                                                                                                                                                                                                                                                                                                                                                                                                                                                                                                                                                                                                                                                                                                                                                                                                                                                                                                                                                                                                                                                                                                     |          |             |             |             |             |         |       |                    |      |      |      |      |   |                    |      |      |      |      |   |                   |   |      |   |      |   |                                 |      |      |      |      |   |                   |      |      |      |      |   |                  |      |      |      |      |   |                    |      |      |      |      |   |                   |      |      |      |      |   |                   |      |      |      |      |    |                   |      |      |      |      |    |                  |       |       |      |      |    |                 |   |      |   |      |
|                                                                                                                            | <table border="1"> <thead> <tr> <th>#</th> <th>Var</th> <th>residual</th> <th>error</th> <th>t-statistic</th> <th>p-value</th> </tr> </thead> <tbody> <tr> <td>1</td> <td>CO<sub>2aer</sub></td> <td>0.02</td> <td>0.01</td> <td>1.49</td> <td>0.07</td> </tr> <tr> <td>2</td> <td>CO<sub>2off</sub></td> <td>5.47</td> <td>3.68</td> <td>1.49</td> <td>0.07</td> </tr> <tr> <td>3</td> <td>COD<sub>in</sub></td> <td>-</td> <td>0.00</td> <td>-</td> <td>0.50</td> </tr> <tr> <td>4</td> <td>N<sub>2</sub>O<sub>off</sub></td> <td>0.62</td> <td>0.42</td> <td>1.49</td> <td>0.07</td> </tr> <tr> <td>5</td> <td>NH<sub>eff</sub></td> <td>1.07</td> <td>0.72</td> <td>1.49</td> <td>0.07</td> </tr> <tr> <td>6</td> <td>NH<sub>in</sub></td> <td>6.43</td> <td>4.33</td> <td>1.49</td> <td>0.07</td> </tr> <tr> <td>7</td> <td>NO<sub>2eff</sub></td> <td>1.55</td> <td>1.04</td> <td>1.49</td> <td>0.07</td> </tr> <tr> <td>8</td> <td>NO<sub>off</sub></td> <td>0.00</td> <td>0.00</td> <td>1.49</td> <td>0.07</td> </tr> <tr> <td>9</td> <td>O<sub>2aer</sub></td> <td>0.00</td> <td>0.00</td> <td>1.49</td> <td>0.07</td> </tr> <tr> <td>10</td> <td>O<sub>2off</sub></td> <td>0.10</td> <td>0.07</td> <td>1.49</td> <td>0.07</td> </tr> <tr> <td>11</td> <td>Q<sub>aer</sub></td> <td>15.87</td> <td>10.68</td> <td>1.49</td> <td>0.07</td> </tr> <tr> <td>12</td> <td>Q<sub>in</sub></td> <td>-</td> <td>0.00</td> <td>-</td> <td>0.50</td> </tr> </tbody> </table> | #        | Var         | residual    | error       | t-statistic | p-value | 1     | CO <sub>2aer</sub> | 0.02 | 0.01 | 1.49 | 0.07 | 2 | CO <sub>2off</sub> | 5.47 | 3.68 | 1.49 | 0.07 | 3 | COD <sub>in</sub> | - | 0.00 | - | 0.50 | 4 | N <sub>2</sub> O <sub>off</sub> | 0.62 | 0.42 | 1.49 | 0.07 | 5 | NH <sub>eff</sub> | 1.07 | 0.72 | 1.49 | 0.07 | 6 | NH <sub>in</sub> | 6.43 | 4.33 | 1.49 | 0.07 | 7 | NO <sub>2eff</sub> | 1.55 | 1.04 | 1.49 | 0.07 | 8 | NO <sub>off</sub> | 0.00 | 0.00 | 1.49 | 0.07 | 9 | O <sub>2aer</sub> | 0.00 | 0.00 | 1.49 | 0.07 | 10 | O <sub>2off</sub> | 0.10 | 0.07 | 1.49 | 0.07 | 11 | Q <sub>aer</sub> | 15.87 | 10.68 | 1.49 | 0.07 | 12 | Q <sub>in</sub> | - | 0.00 | - | 0.50 |
| #                                                                                                                          | Var                                                                                                                                                                                                                                                                                                                                                                                                                                                                                                                                                                                                                                                                                                                                                                                                                                                                                                                                                                                                                                                                                                                                                                                                                                                                                                                                                                                                                                                                         | residual | error       | t-statistic | p-value     |             |         |       |                    |      |      |      |      |   |                    |      |      |      |      |   |                   |   |      |   |      |   |                                 |      |      |      |      |   |                   |      |      |      |      |   |                  |      |      |      |      |   |                    |      |      |      |      |   |                   |      |      |      |      |   |                   |      |      |      |      |    |                   |      |      |      |      |    |                  |       |       |      |      |    |                 |   |      |   |      |
| 1                                                                                                                          | CO <sub>2aer</sub>                                                                                                                                                                                                                                                                                                                                                                                                                                                                                                                                                                                                                                                                                                                                                                                                                                                                                                                                                                                                                                                                                                                                                                                                                                                                                                                                                                                                                                                          | 0.02     | 0.01        | 1.49        | 0.07        |             |         |       |                    |      |      |      |      |   |                    |      |      |      |      |   |                   |   |      |   |      |   |                                 |      |      |      |      |   |                   |      |      |      |      |   |                  |      |      |      |      |   |                    |      |      |      |      |   |                   |      |      |      |      |   |                   |      |      |      |      |    |                   |      |      |      |      |    |                  |       |       |      |      |    |                 |   |      |   |      |
| 2                                                                                                                          | CO <sub>2off</sub>                                                                                                                                                                                                                                                                                                                                                                                                                                                                                                                                                                                                                                                                                                                                                                                                                                                                                                                                                                                                                                                                                                                                                                                                                                                                                                                                                                                                                                                          | 5.47     | 3.68        | 1.49        | 0.07        |             |         |       |                    |      |      |      |      |   |                    |      |      |      |      |   |                   |   |      |   |      |   |                                 |      |      |      |      |   |                   |      |      |      |      |   |                  |      |      |      |      |   |                    |      |      |      |      |   |                   |      |      |      |      |   |                   |      |      |      |      |    |                   |      |      |      |      |    |                  |       |       |      |      |    |                 |   |      |   |      |
| 3                                                                                                                          | COD <sub>in</sub>                                                                                                                                                                                                                                                                                                                                                                                                                                                                                                                                                                                                                                                                                                                                                                                                                                                                                                                                                                                                                                                                                                                                                                                                                                                                                                                                                                                                                                                           | -        | 0.00        | -           | 0.50        |             |         |       |                    |      |      |      |      |   |                    |      |      |      |      |   |                   |   |      |   |      |   |                                 |      |      |      |      |   |                   |      |      |      |      |   |                  |      |      |      |      |   |                    |      |      |      |      |   |                   |      |      |      |      |   |                   |      |      |      |      |    |                   |      |      |      |      |    |                  |       |       |      |      |    |                 |   |      |   |      |
| 4                                                                                                                          | N <sub>2</sub> O <sub>off</sub>                                                                                                                                                                                                                                                                                                                                                                                                                                                                                                                                                                                                                                                                                                                                                                                                                                                                                                                                                                                                                                                                                                                                                                                                                                                                                                                                                                                                                                             | 0.62     | 0.42        | 1.49        | 0.07        |             |         |       |                    |      |      |      |      |   |                    |      |      |      |      |   |                   |   |      |   |      |   |                                 |      |      |      |      |   |                   |      |      |      |      |   |                  |      |      |      |      |   |                    |      |      |      |      |   |                   |      |      |      |      |   |                   |      |      |      |      |    |                   |      |      |      |      |    |                  |       |       |      |      |    |                 |   |      |   |      |
| 5                                                                                                                          | NH <sub>eff</sub>                                                                                                                                                                                                                                                                                                                                                                                                                                                                                                                                                                                                                                                                                                                                                                                                                                                                                                                                                                                                                                                                                                                                                                                                                                                                                                                                                                                                                                                           | 1.07     | 0.72        | 1.49        | 0.07        |             |         |       |                    |      |      |      |      |   |                    |      |      |      |      |   |                   |   |      |   |      |   |                                 |      |      |      |      |   |                   |      |      |      |      |   |                  |      |      |      |      |   |                    |      |      |      |      |   |                   |      |      |      |      |   |                   |      |      |      |      |    |                   |      |      |      |      |    |                  |       |       |      |      |    |                 |   |      |   |      |
| 6                                                                                                                          | NH <sub>in</sub>                                                                                                                                                                                                                                                                                                                                                                                                                                                                                                                                                                                                                                                                                                                                                                                                                                                                                                                                                                                                                                                                                                                                                                                                                                                                                                                                                                                                                                                            | 6.43     | 4.33        | 1.49        | 0.07        |             |         |       |                    |      |      |      |      |   |                    |      |      |      |      |   |                   |   |      |   |      |   |                                 |      |      |      |      |   |                   |      |      |      |      |   |                  |      |      |      |      |   |                    |      |      |      |      |   |                   |      |      |      |      |   |                   |      |      |      |      |    |                   |      |      |      |      |    |                  |       |       |      |      |    |                 |   |      |   |      |
| 7                                                                                                                          | NO <sub>2eff</sub>                                                                                                                                                                                                                                                                                                                                                                                                                                                                                                                                                                                                                                                                                                                                                                                                                                                                                                                                                                                                                                                                                                                                                                                                                                                                                                                                                                                                                                                          | 1.55     | 1.04        | 1.49        | 0.07        |             |         |       |                    |      |      |      |      |   |                    |      |      |      |      |   |                   |   |      |   |      |   |                                 |      |      |      |      |   |                   |      |      |      |      |   |                  |      |      |      |      |   |                    |      |      |      |      |   |                   |      |      |      |      |   |                   |      |      |      |      |    |                   |      |      |      |      |    |                  |       |       |      |      |    |                 |   |      |   |      |
| 8                                                                                                                          | NO <sub>off</sub>                                                                                                                                                                                                                                                                                                                                                                                                                                                                                                                                                                                                                                                                                                                                                                                                                                                                                                                                                                                                                                                                                                                                                                                                                                                                                                                                                                                                                                                           | 0.00     | 0.00        | 1.49        | 0.07        |             |         |       |                    |      |      |      |      |   |                    |      |      |      |      |   |                   |   |      |   |      |   |                                 |      |      |      |      |   |                   |      |      |      |      |   |                  |      |      |      |      |   |                    |      |      |      |      |   |                   |      |      |      |      |   |                   |      |      |      |      |    |                   |      |      |      |      |    |                  |       |       |      |      |    |                 |   |      |   |      |
| 9                                                                                                                          | O <sub>2aer</sub>                                                                                                                                                                                                                                                                                                                                                                                                                                                                                                                                                                                                                                                                                                                                                                                                                                                                                                                                                                                                                                                                                                                                                                                                                                                                                                                                                                                                                                                           | 0.00     | 0.00        | 1.49        | 0.07        |             |         |       |                    |      |      |      |      |   |                    |      |      |      |      |   |                   |   |      |   |      |   |                                 |      |      |      |      |   |                   |      |      |      |      |   |                  |      |      |      |      |   |                    |      |      |      |      |   |                   |      |      |      |      |   |                   |      |      |      |      |    |                   |      |      |      |      |    |                  |       |       |      |      |    |                 |   |      |   |      |
| 10                                                                                                                         | O <sub>2off</sub>                                                                                                                                                                                                                                                                                                                                                                                                                                                                                                                                                                                                                                                                                                                                                                                                                                                                                                                                                                                                                                                                                                                                                                                                                                                                                                                                                                                                                                                           | 0.10     | 0.07        | 1.49        | 0.07        |             |         |       |                    |      |      |      |      |   |                    |      |      |      |      |   |                   |   |      |   |      |   |                                 |      |      |      |      |   |                   |      |      |      |      |   |                  |      |      |      |      |   |                    |      |      |      |      |   |                   |      |      |      |      |   |                   |      |      |      |      |    |                   |      |      |      |      |    |                  |       |       |      |      |    |                 |   |      |   |      |
| 11                                                                                                                         | Q <sub>aer</sub>                                                                                                                                                                                                                                                                                                                                                                                                                                                                                                                                                                                                                                                                                                                                                                                                                                                                                                                                                                                                                                                                                                                                                                                                                                                                                                                                                                                                                                                            | 15.87    | 10.68       | 1.49        | 0.07        |             |         |       |                    |      |      |      |      |   |                    |      |      |      |      |   |                   |   |      |   |      |   |                                 |      |      |      |      |   |                   |      |      |      |      |   |                  |      |      |      |      |   |                    |      |      |      |      |   |                   |      |      |      |      |   |                   |      |      |      |      |    |                   |      |      |      |      |    |                  |       |       |      |      |    |                 |   |      |   |      |
| 12                                                                                                                         | Q <sub>in</sub>                                                                                                                                                                                                                                                                                                                                                                                                                                                                                                                                                                                                                                                                                                                                                                                                                                                                                                                                                                                                                                                                                                                                                                                                                                                                                                                                                                                                                                                             | -        | 0.00        | -           | 0.50        |             |         |       |                    |      |      |      |      |   |                    |      |      |      |      |   |                   |   |      |   |      |   |                                 |      |      |      |      |   |                   |      |      |      |      |   |                  |      |      |      |      |   |                    |      |      |      |      |   |                   |      |      |      |      |   |                   |      |      |      |      |    |                   |      |      |      |      |    |                  |       |       |      |      |    |                 |   |      |   |      |
| <b>Nodal test</b><br>Degree of freedom = 1<br>t-statistic <sub>max</sub> = 1.96<br>p-value <sub>min</sub> = 0.03           | no gross error detected                                                                                                                                                                                                                                                                                                                                                                                                                                                                                                                                                                                                                                                                                                                                                                                                                                                                                                                                                                                                                                                                                                                                                                                                                                                                                                                                                                                                                                                     |          |             |             |             |             |         |       |                    |      |      |      |      |   |                    |      |      |      |      |   |                   |   |      |   |      |   |                                 |      |      |      |      |   |                   |      |      |      |      |   |                  |      |      |      |      |   |                    |      |      |      |      |   |                   |      |      |      |      |   |                   |      |      |      |      |    |                   |      |      |      |      |    |                  |       |       |      |      |    |                 |   |      |   |      |
|                                                                                                                            | <table border="1"> <thead> <tr> <th>#</th> <th>misbalance</th> <th>error</th> <th>t-statistic</th> <th>p-value</th> </tr> </thead> <tbody> <tr> <td>1</td> <td>1,187</td> <td>811</td> <td>1.46</td> <td>0.07</td> </tr> </tbody> </table>                                                                                                                                                                                                                                                                                                                                                                                                                                                                                                                                                                                                                                                                                                                                                                                                                                                                                                                                                                                                                                                                                                                                                                                                                                  | #        | misbalance  | error       | t-statistic | p-value     | 1       | 1,187 | 811                | 1.46 | 0.07 |      |      |   |                    |      |      |      |      |   |                   |   |      |   |      |   |                                 |      |      |      |      |   |                   |      |      |      |      |   |                  |      |      |      |      |   |                    |      |      |      |      |   |                   |      |      |      |      |   |                   |      |      |      |      |    |                   |      |      |      |      |    |                  |       |       |      |      |    |                 |   |      |   |      |
| #                                                                                                                          | misbalance                                                                                                                                                                                                                                                                                                                                                                                                                                                                                                                                                                                                                                                                                                                                                                                                                                                                                                                                                                                                                                                                                                                                                                                                                                                                                                                                                                                                                                                                  | error    | t-statistic | p-value     |             |             |         |       |                    |      |      |      |      |   |                    |      |      |      |      |   |                   |   |      |   |      |   |                                 |      |      |      |      |   |                   |      |      |      |      |   |                  |      |      |      |      |   |                    |      |      |      |      |   |                   |      |      |      |      |   |                   |      |      |      |      |    |                   |      |      |      |      |    |                  |       |       |      |      |    |                 |   |      |   |      |
| 1                                                                                                                          | 1,187                                                                                                                                                                                                                                                                                                                                                                                                                                                                                                                                                                                                                                                                                                                                                                                                                                                                                                                                                                                                                                                                                                                                                                                                                                                                                                                                                                                                                                                                       | 811      | 1.46        | 0.07        |             |             |         |       |                    |      |      |      |      |   |                    |      |      |      |      |   |                   |   |      |   |      |   |                                 |      |      |      |      |   |                   |      |      |      |      |   |                  |      |      |      |      |   |                    |      |      |      |      |   |                   |      |      |      |      |   |                   |      |      |      |      |    |                   |      |      |      |      |    |                  |       |       |      |      |    |                 |   |      |   |      |

## Results for S7

Table B7a. Data reconciliation (iteration = 3, convergence tolerance =  $2.8 \times 10^{-09}$ , CPU time = 0.7s)

| #  | Var                             | measured   | std  | sD%  | reconciled | std  | sD%   | $\Delta(\%)$ | i(%)  | M | I |
|----|---------------------------------|------------|------|------|------------|------|-------|--------------|-------|---|---|
| 1  | CO <sub>2aer</sub>              | 545        | 8    | 1.48 | 545        | 8    | 1.48  | 100.00       | 0.00  | M | I |
| 2  | CO <sub>2off</sub>              | 24,375     | 180  | 0.74 | 24,375     | 180  | 0.74  | 100.00       | 0.00  | M | I |
| 3  | COD <sub>in</sub>               | 2.78       | 0.01 | 0.36 | 2.78       | 0.01 | 0.36  | 100.00       | 0.00  | M | I |
| 4  | N <sub>2</sub> O <sub>off</sub> | 252        | 5    | 2.18 | 252        | 5    | 2.18  | 100.01       | 0.00  | M | I |
| 5  | NH <sub>eff</sub>               | 41.0       | 2.1  | 5.00 | 41.6       | 1.9  | 4.58  | 101.37       | 7.18  | M | I |
| 6  | NH <sub>in</sub>                | 91.4       | 4.6  | 5.00 | 88.6       | 2.6  | 2.88  | 96.95        | 44.17 | M | I |
| 7  | NO <sub>2eff</sub>              | 47.1       | 2.4  | 5.00 | 47.9       | 2.1  | 4.48  | 101.53       | 9.07  | M | I |
| 8  | NO <sub>3eff</sub>              | 0.5        | 0.0  | 5.00 | 0.5        | 0.0  | 5.00  | 100.02       | 0.00  | M | I |
| 9  | NO <sub>off</sub>               | 28         | 0    | 1.07 | 28         | 0    | 1.07  | 100.00       | 0.00  | M | I |
| 10 | O <sub>2aer</sub>               | 210,407    | 13   | 0.01 | 210,407    | 13   | 0.01  | 100.00       | 0.00  | M | I |
| 11 | O <sub>2off</sub>               | 192,234    | 121  | 0.06 | 192,234    | 121  | 0.06  | 100.00       | 0.00  | M | I |
| 12 | Q <sub>aer</sub>                | 2,112      | 34   | 2    | 2,112      | 34   | 1.60  | 100.00       | 0.00  | M | I |
| 13 | Q <sub>in</sub>                 | 28.99      | 0.03 | 0.11 | 28.99      | 0.03 | 0.11  | 100.00       | 0.00  | M | I |
| #  | Var                             | calculated | std  | sD%  | reconciled | std  | sD%   | $\Delta(\%)$ | i(%)  | M | I |
| 14 | Q <sub>inf</sub>                | 851        | 150  | 18   | 884        | 137  | 15.55 | 103.96       | 8.50  | U | I |
| 15 | Q <sub>off</sub>                | 3,112      | 154  | 5    | 3,158      | 141  | 4.45  | 101.48       | 8.65  | U | I |
| 16 | (TIC:NH) <sub>in</sub>          | 1.08       | 0.08 | 7    | 1.13       | 0.04 | 3.49  | 104.69       | 48.74 | U | I |

Table B7b. Gross error detection

| Test                                                                                                                       | Evaluation                                                                                                                                                                                                                                                                                                                                                                                                                                                                                                                                                                                                                                                                                                                                                                                                                                                                                                                                                                                                                                                                                                                                                                                                                                                                                                                                                                                                                                                                |          |             |             |             |             |         |       |                    |      |      |      |      |   |                    |      |      |      |      |   |                   |   |      |   |      |   |                                 |      |      |      |      |   |                   |      |      |      |      |   |                  |      |      |      |      |   |                    |      |      |      |      |   |                   |      |      |      |      |   |                   |      |      |      |      |    |                   |      |      |      |      |    |                  |      |      |      |      |    |                 |   |      |   |      |
|----------------------------------------------------------------------------------------------------------------------------|---------------------------------------------------------------------------------------------------------------------------------------------------------------------------------------------------------------------------------------------------------------------------------------------------------------------------------------------------------------------------------------------------------------------------------------------------------------------------------------------------------------------------------------------------------------------------------------------------------------------------------------------------------------------------------------------------------------------------------------------------------------------------------------------------------------------------------------------------------------------------------------------------------------------------------------------------------------------------------------------------------------------------------------------------------------------------------------------------------------------------------------------------------------------------------------------------------------------------------------------------------------------------------------------------------------------------------------------------------------------------------------------------------------------------------------------------------------------------|----------|-------------|-------------|-------------|-------------|---------|-------|--------------------|------|------|------|------|---|--------------------|------|------|------|------|---|-------------------|---|------|---|------|---|---------------------------------|------|------|------|------|---|-------------------|------|------|------|------|---|------------------|------|------|------|------|---|--------------------|------|------|------|------|---|-------------------|------|------|------|------|---|-------------------|------|------|------|------|----|-------------------|------|------|------|------|----|------------------|------|------|------|------|----|-----------------|---|------|---|------|
| <b>Global test</b><br>System degree of redundancy = 1<br>t-statistic = 5.95, $\chi_{1-0.05,11}^2 = 3.84$<br>p-value = 0.01 | Gross error detected                                                                                                                                                                                                                                                                                                                                                                                                                                                                                                                                                                                                                                                                                                                                                                                                                                                                                                                                                                                                                                                                                                                                                                                                                                                                                                                                                                                                                                                      |          |             |             |             |             |         |       |                    |      |      |      |      |   |                    |      |      |      |      |   |                   |   |      |   |      |   |                                 |      |      |      |      |   |                   |      |      |      |      |   |                  |      |      |      |      |   |                    |      |      |      |      |   |                   |      |      |      |      |   |                   |      |      |      |      |    |                   |      |      |      |      |    |                  |      |      |      |      |    |                 |   |      |   |      |
| <b>Measurement test</b><br>Degree of freedom = 1<br>t-statistic <sub>max</sub> = 1.96<br>p-value <sub>min</sub> = 0.03     | no gross error detected                                                                                                                                                                                                                                                                                                                                                                                                                                                                                                                                                                                                                                                                                                                                                                                                                                                                                                                                                                                                                                                                                                                                                                                                                                                                                                                                                                                                                                                   |          |             |             |             |             |         |       |                    |      |      |      |      |   |                    |      |      |      |      |   |                   |   |      |   |      |   |                                 |      |      |      |      |   |                   |      |      |      |      |   |                  |      |      |      |      |   |                    |      |      |      |      |   |                   |      |      |      |      |   |                   |      |      |      |      |    |                   |      |      |      |      |    |                  |      |      |      |      |    |                 |   |      |   |      |
|                                                                                                                            | <table border="1"> <thead> <tr> <th>#</th> <th>Var</th> <th>residual</th> <th>error</th> <th>t-statistic</th> <th>p-value</th> </tr> </thead> <tbody> <tr> <td>1</td> <td>CO<sub>2aer</sub></td> <td>0.00</td> <td>0.00</td> <td>0.74</td> <td>0.23</td> </tr> <tr> <td>2</td> <td>CO<sub>2off</sub></td> <td>0.08</td> <td>0.11</td> <td>0.74</td> <td>0.23</td> </tr> <tr> <td>3</td> <td>COD<sub>in</sub></td> <td>-</td> <td>0.00</td> <td>-</td> <td>0.50</td> </tr> <tr> <td>4</td> <td>N<sub>2</sub>O<sub>off</sub></td> <td>0.02</td> <td>0.02</td> <td>0.74</td> <td>0.23</td> </tr> <tr> <td>5</td> <td>NH<sub>eff</sub></td> <td>0.56</td> <td>0.76</td> <td>0.74</td> <td>0.23</td> </tr> <tr> <td>6</td> <td>NH<sub>in</sub></td> <td>2.79</td> <td>3.79</td> <td>0.74</td> <td>0.23</td> </tr> <tr> <td>7</td> <td>NO<sub>2eff</sub></td> <td>0.72</td> <td>0.98</td> <td>0.74</td> <td>0.23</td> </tr> <tr> <td>8</td> <td>NO<sub>off</sub></td> <td>0.00</td> <td>0.00</td> <td>0.74</td> <td>0.23</td> </tr> <tr> <td>9</td> <td>O<sub>2aer</sub></td> <td>0.00</td> <td>0.00</td> <td>0.74</td> <td>0.23</td> </tr> <tr> <td>10</td> <td>O<sub>2off</sub></td> <td>0.00</td> <td>0.00</td> <td>0.74</td> <td>0.23</td> </tr> <tr> <td>11</td> <td>Q<sub>aer</sub></td> <td>0.17</td> <td>0.24</td> <td>0.74</td> <td>0.23</td> </tr> <tr> <td>12</td> <td>Q<sub>in</sub></td> <td>-</td> <td>0.00</td> <td>-</td> <td>0.50</td> </tr> </tbody> </table> | #        | Var         | residual    | error       | t-statistic | p-value | 1     | CO <sub>2aer</sub> | 0.00 | 0.00 | 0.74 | 0.23 | 2 | CO <sub>2off</sub> | 0.08 | 0.11 | 0.74 | 0.23 | 3 | COD <sub>in</sub> | - | 0.00 | - | 0.50 | 4 | N <sub>2</sub> O <sub>off</sub> | 0.02 | 0.02 | 0.74 | 0.23 | 5 | NH <sub>eff</sub> | 0.56 | 0.76 | 0.74 | 0.23 | 6 | NH <sub>in</sub> | 2.79 | 3.79 | 0.74 | 0.23 | 7 | NO <sub>2eff</sub> | 0.72 | 0.98 | 0.74 | 0.23 | 8 | NO <sub>off</sub> | 0.00 | 0.00 | 0.74 | 0.23 | 9 | O <sub>2aer</sub> | 0.00 | 0.00 | 0.74 | 0.23 | 10 | O <sub>2off</sub> | 0.00 | 0.00 | 0.74 | 0.23 | 11 | Q <sub>aer</sub> | 0.17 | 0.24 | 0.74 | 0.23 | 12 | Q <sub>in</sub> | - | 0.00 | - | 0.50 |
| #                                                                                                                          | Var                                                                                                                                                                                                                                                                                                                                                                                                                                                                                                                                                                                                                                                                                                                                                                                                                                                                                                                                                                                                                                                                                                                                                                                                                                                                                                                                                                                                                                                                       | residual | error       | t-statistic | p-value     |             |         |       |                    |      |      |      |      |   |                    |      |      |      |      |   |                   |   |      |   |      |   |                                 |      |      |      |      |   |                   |      |      |      |      |   |                  |      |      |      |      |   |                    |      |      |      |      |   |                   |      |      |      |      |   |                   |      |      |      |      |    |                   |      |      |      |      |    |                  |      |      |      |      |    |                 |   |      |   |      |
| 1                                                                                                                          | CO <sub>2aer</sub>                                                                                                                                                                                                                                                                                                                                                                                                                                                                                                                                                                                                                                                                                                                                                                                                                                                                                                                                                                                                                                                                                                                                                                                                                                                                                                                                                                                                                                                        | 0.00     | 0.00        | 0.74        | 0.23        |             |         |       |                    |      |      |      |      |   |                    |      |      |      |      |   |                   |   |      |   |      |   |                                 |      |      |      |      |   |                   |      |      |      |      |   |                  |      |      |      |      |   |                    |      |      |      |      |   |                   |      |      |      |      |   |                   |      |      |      |      |    |                   |      |      |      |      |    |                  |      |      |      |      |    |                 |   |      |   |      |
| 2                                                                                                                          | CO <sub>2off</sub>                                                                                                                                                                                                                                                                                                                                                                                                                                                                                                                                                                                                                                                                                                                                                                                                                                                                                                                                                                                                                                                                                                                                                                                                                                                                                                                                                                                                                                                        | 0.08     | 0.11        | 0.74        | 0.23        |             |         |       |                    |      |      |      |      |   |                    |      |      |      |      |   |                   |   |      |   |      |   |                                 |      |      |      |      |   |                   |      |      |      |      |   |                  |      |      |      |      |   |                    |      |      |      |      |   |                   |      |      |      |      |   |                   |      |      |      |      |    |                   |      |      |      |      |    |                  |      |      |      |      |    |                 |   |      |   |      |
| 3                                                                                                                          | COD <sub>in</sub>                                                                                                                                                                                                                                                                                                                                                                                                                                                                                                                                                                                                                                                                                                                                                                                                                                                                                                                                                                                                                                                                                                                                                                                                                                                                                                                                                                                                                                                         | -        | 0.00        | -           | 0.50        |             |         |       |                    |      |      |      |      |   |                    |      |      |      |      |   |                   |   |      |   |      |   |                                 |      |      |      |      |   |                   |      |      |      |      |   |                  |      |      |      |      |   |                    |      |      |      |      |   |                   |      |      |      |      |   |                   |      |      |      |      |    |                   |      |      |      |      |    |                  |      |      |      |      |    |                 |   |      |   |      |
| 4                                                                                                                          | N <sub>2</sub> O <sub>off</sub>                                                                                                                                                                                                                                                                                                                                                                                                                                                                                                                                                                                                                                                                                                                                                                                                                                                                                                                                                                                                                                                                                                                                                                                                                                                                                                                                                                                                                                           | 0.02     | 0.02        | 0.74        | 0.23        |             |         |       |                    |      |      |      |      |   |                    |      |      |      |      |   |                   |   |      |   |      |   |                                 |      |      |      |      |   |                   |      |      |      |      |   |                  |      |      |      |      |   |                    |      |      |      |      |   |                   |      |      |      |      |   |                   |      |      |      |      |    |                   |      |      |      |      |    |                  |      |      |      |      |    |                 |   |      |   |      |
| 5                                                                                                                          | NH <sub>eff</sub>                                                                                                                                                                                                                                                                                                                                                                                                                                                                                                                                                                                                                                                                                                                                                                                                                                                                                                                                                                                                                                                                                                                                                                                                                                                                                                                                                                                                                                                         | 0.56     | 0.76        | 0.74        | 0.23        |             |         |       |                    |      |      |      |      |   |                    |      |      |      |      |   |                   |   |      |   |      |   |                                 |      |      |      |      |   |                   |      |      |      |      |   |                  |      |      |      |      |   |                    |      |      |      |      |   |                   |      |      |      |      |   |                   |      |      |      |      |    |                   |      |      |      |      |    |                  |      |      |      |      |    |                 |   |      |   |      |
| 6                                                                                                                          | NH <sub>in</sub>                                                                                                                                                                                                                                                                                                                                                                                                                                                                                                                                                                                                                                                                                                                                                                                                                                                                                                                                                                                                                                                                                                                                                                                                                                                                                                                                                                                                                                                          | 2.79     | 3.79        | 0.74        | 0.23        |             |         |       |                    |      |      |      |      |   |                    |      |      |      |      |   |                   |   |      |   |      |   |                                 |      |      |      |      |   |                   |      |      |      |      |   |                  |      |      |      |      |   |                    |      |      |      |      |   |                   |      |      |      |      |   |                   |      |      |      |      |    |                   |      |      |      |      |    |                  |      |      |      |      |    |                 |   |      |   |      |
| 7                                                                                                                          | NO <sub>2eff</sub>                                                                                                                                                                                                                                                                                                                                                                                                                                                                                                                                                                                                                                                                                                                                                                                                                                                                                                                                                                                                                                                                                                                                                                                                                                                                                                                                                                                                                                                        | 0.72     | 0.98        | 0.74        | 0.23        |             |         |       |                    |      |      |      |      |   |                    |      |      |      |      |   |                   |   |      |   |      |   |                                 |      |      |      |      |   |                   |      |      |      |      |   |                  |      |      |      |      |   |                    |      |      |      |      |   |                   |      |      |      |      |   |                   |      |      |      |      |    |                   |      |      |      |      |    |                  |      |      |      |      |    |                 |   |      |   |      |
| 8                                                                                                                          | NO <sub>off</sub>                                                                                                                                                                                                                                                                                                                                                                                                                                                                                                                                                                                                                                                                                                                                                                                                                                                                                                                                                                                                                                                                                                                                                                                                                                                                                                                                                                                                                                                         | 0.00     | 0.00        | 0.74        | 0.23        |             |         |       |                    |      |      |      |      |   |                    |      |      |      |      |   |                   |   |      |   |      |   |                                 |      |      |      |      |   |                   |      |      |      |      |   |                  |      |      |      |      |   |                    |      |      |      |      |   |                   |      |      |      |      |   |                   |      |      |      |      |    |                   |      |      |      |      |    |                  |      |      |      |      |    |                 |   |      |   |      |
| 9                                                                                                                          | O <sub>2aer</sub>                                                                                                                                                                                                                                                                                                                                                                                                                                                                                                                                                                                                                                                                                                                                                                                                                                                                                                                                                                                                                                                                                                                                                                                                                                                                                                                                                                                                                                                         | 0.00     | 0.00        | 0.74        | 0.23        |             |         |       |                    |      |      |      |      |   |                    |      |      |      |      |   |                   |   |      |   |      |   |                                 |      |      |      |      |   |                   |      |      |      |      |   |                  |      |      |      |      |   |                    |      |      |      |      |   |                   |      |      |      |      |   |                   |      |      |      |      |    |                   |      |      |      |      |    |                  |      |      |      |      |    |                 |   |      |   |      |
| 10                                                                                                                         | O <sub>2off</sub>                                                                                                                                                                                                                                                                                                                                                                                                                                                                                                                                                                                                                                                                                                                                                                                                                                                                                                                                                                                                                                                                                                                                                                                                                                                                                                                                                                                                                                                         | 0.00     | 0.00        | 0.74        | 0.23        |             |         |       |                    |      |      |      |      |   |                    |      |      |      |      |   |                   |   |      |   |      |   |                                 |      |      |      |      |   |                   |      |      |      |      |   |                  |      |      |      |      |   |                    |      |      |      |      |   |                   |      |      |      |      |   |                   |      |      |      |      |    |                   |      |      |      |      |    |                  |      |      |      |      |    |                 |   |      |   |      |
| 11                                                                                                                         | Q <sub>aer</sub>                                                                                                                                                                                                                                                                                                                                                                                                                                                                                                                                                                                                                                                                                                                                                                                                                                                                                                                                                                                                                                                                                                                                                                                                                                                                                                                                                                                                                                                          | 0.17     | 0.24        | 0.74        | 0.23        |             |         |       |                    |      |      |      |      |   |                    |      |      |      |      |   |                   |   |      |   |      |   |                                 |      |      |      |      |   |                   |      |      |      |      |   |                  |      |      |      |      |   |                    |      |      |      |      |   |                   |      |      |      |      |   |                   |      |      |      |      |    |                   |      |      |      |      |    |                  |      |      |      |      |    |                 |   |      |   |      |
| 12                                                                                                                         | Q <sub>in</sub>                                                                                                                                                                                                                                                                                                                                                                                                                                                                                                                                                                                                                                                                                                                                                                                                                                                                                                                                                                                                                                                                                                                                                                                                                                                                                                                                                                                                                                                           | -        | 0.00        | -           | 0.50        |             |         |       |                    |      |      |      |      |   |                    |      |      |      |      |   |                   |   |      |   |      |   |                                 |      |      |      |      |   |                   |      |      |      |      |   |                  |      |      |      |      |   |                    |      |      |      |      |   |                   |      |      |      |      |   |                   |      |      |      |      |    |                   |      |      |      |      |    |                  |      |      |      |      |    |                 |   |      |   |      |
| <b>Nodal test</b><br>Degree of freedom = 1<br>t-statistic <sub>max</sub> = 1.96<br>p-value <sub>min</sub> = 0.03           | no gross error detected                                                                                                                                                                                                                                                                                                                                                                                                                                                                                                                                                                                                                                                                                                                                                                                                                                                                                                                                                                                                                                                                                                                                                                                                                                                                                                                                                                                                                                                   |          |             |             |             |             |         |       |                    |      |      |      |      |   |                    |      |      |      |      |   |                   |   |      |   |      |   |                                 |      |      |      |      |   |                   |      |      |      |      |   |                  |      |      |      |      |   |                    |      |      |      |      |   |                   |      |      |      |      |   |                   |      |      |      |      |    |                   |      |      |      |      |    |                  |      |      |      |      |    |                 |   |      |   |      |
|                                                                                                                            | <table border="1"> <thead> <tr> <th>#</th> <th>misbalance</th> <th>error</th> <th>t-statistic</th> <th>p-value</th> </tr> </thead> <tbody> <tr> <td>1</td> <td>7,234</td> <td>9,841</td> <td>0.74</td> <td>0.23</td> </tr> </tbody> </table>                                                                                                                                                                                                                                                                                                                                                                                                                                                                                                                                                                                                                                                                                                                                                                                                                                                                                                                                                                                                                                                                                                                                                                                                                              | #        | misbalance  | error       | t-statistic | p-value     | 1       | 7,234 | 9,841              | 0.74 | 0.23 |      |      |   |                    |      |      |      |      |   |                   |   |      |   |      |   |                                 |      |      |      |      |   |                   |      |      |      |      |   |                  |      |      |      |      |   |                    |      |      |      |      |   |                   |      |      |      |      |   |                   |      |      |      |      |    |                   |      |      |      |      |    |                  |      |      |      |      |    |                 |   |      |   |      |
| #                                                                                                                          | misbalance                                                                                                                                                                                                                                                                                                                                                                                                                                                                                                                                                                                                                                                                                                                                                                                                                                                                                                                                                                                                                                                                                                                                                                                                                                                                                                                                                                                                                                                                | error    | t-statistic | p-value     |             |             |         |       |                    |      |      |      |      |   |                    |      |      |      |      |   |                   |   |      |   |      |   |                                 |      |      |      |      |   |                   |      |      |      |      |   |                  |      |      |      |      |   |                    |      |      |      |      |   |                   |      |      |      |      |   |                   |      |      |      |      |    |                   |      |      |      |      |    |                  |      |      |      |      |    |                 |   |      |   |      |
| 1                                                                                                                          | 7,234                                                                                                                                                                                                                                                                                                                                                                                                                                                                                                                                                                                                                                                                                                                                                                                                                                                                                                                                                                                                                                                                                                                                                                                                                                                                                                                                                                                                                                                                     | 9,841    | 0.74        | 0.23        |             |             |         |       |                    |      |      |      |      |   |                    |      |      |      |      |   |                   |   |      |   |      |   |                                 |      |      |      |      |   |                   |      |      |      |      |   |                  |      |      |      |      |   |                    |      |      |      |      |   |                   |      |      |      |      |   |                   |      |      |      |      |    |                   |      |      |      |      |    |                  |      |      |      |      |    |                 |   |      |   |      |

## Results for S8

Table B8a. Data reconciliation (iteration = 3, convergence tolerance =  $2.8 \times 10^{-09}$ , CPU time = 0.7s)

| #  | Var                             | measured | std  | sD%  | reconciled | std  | sD%  | $\Delta(\%)$ | i(%)  | M | I |
|----|---------------------------------|----------|------|------|------------|------|------|--------------|-------|---|---|
| 1  | CO <sub>2aer</sub>              | 630      | 14   | 2.26 | 630        | 14   | 2.26 | 100.00       | 0.00  | M | I |
| 2  | CO <sub>2off</sub>              | 28,059   | 98   | 0.35 | 28,059     | 98   | 0.35 | 100.00       | 0.00  | M | I |
| 3  | COD <sub>in</sub>               | 2.78     | 0.01 | 0.36 | 2.78       | 0.01 | 0.36 | 100.00       | 0.00  | M | I |
| 4  | N <sub>2</sub> O <sub>off</sub> | 176      | 8    | 4.50 | 176        | 8    | 4.50 | 100.04       | 0.00  | M | I |
| 5  | NH <sub>eff</sub>               | 42.4     | 2.1  | 5.00 | 43.6       | 2.0  | 4.53 | 102.74       | 6.92  | M | I |
| 6  | NH <sub>in</sub>                | 98.0     | 4.9  | 5.00 | 91.8       | 2.6  | 2.86 | 93.68        | 46.43 | M | I |
| 7  | NO <sub>2eff</sub>              | 47.0     | 2.4  | 5.00 | 48.4       | 2.2  | 4.47 | 102.93       | 7.97  | M | I |
| 8  | NO <sub>3eff</sub>              | 1.5      | 0.1  | 5.00 | 1.5        | 0.1  | 4.99 | 100.09       | 0.01  | M | I |
| 9  | NO <sub>off</sub>               | 47       | 0    | 0.56 | 47         | 0    | 0.56 | 100.00       | 0.00  | M | I |
| 10 | O <sub>2aer</sub>               | 210,447  | 16   | 0.01 | 210,447    | 16   | 0.01 | 100.00       | 0.00  | M | I |
| 11 | O <sub>2off</sub>               | 190,022  | 73   | 0.04 | 190,022    | 73   | 0.04 | 100.00       | 0.00  | M | I |
| 12 | Q <sub>aer</sub>                | 2,056    | 16   | 1    | 2,056      | 16   | 0.77 | 100.00       | 0.00  | M | I |
| 13 | Q <sub>in</sub>                 | 28.73    | 0.13 | 0.46 | 28.73      | 0.13 | 0.46 | 100.00       | 0.00  | M | I |

  

| #  | Var                    | calculated | std  | sD% | reconciled | std  | sD%   | $\Delta(\%)$ | i(%)  | M | I |
|----|------------------------|------------|------|-----|------------|------|-------|--------------|-------|---|---|
| 14 | Q <sub>inf</sub>       | 629        | 129  | 21  | 599        | 115  | 19.16 | 95.29        | 11.03 | U | I |
| 15 | Q <sub>off</sub>       | 2,825      | 135  | 5   | 2,903      | 124  | 4.28  | 102.77       | 7.73  | U | I |
| 16 | (TIC:NH) <sub>in</sub> | 1.06       | 0.07 | 7   | 1.16       | 0.04 | 3.24  | 109.73       | 48.80 | U | I |

Table B8b. Gross error detection

| Test                                                                                                                       | Evaluation                                                                                                                                                                                                                                                                                                                                                                                                                                                                                                                                                                                                                                                                                                                                                                                                                                                                                                                                                                                                                                                                                                                                                                                                                                                                                                                                                                                                                                                                |          |             |             |             |             |         |        |                    |      |      |      |      |   |                    |      |      |      |      |   |                   |   |      |   |      |   |                                 |      |      |      |      |   |                   |      |      |      |      |   |                  |      |      |      |      |   |                    |      |      |      |      |   |                   |      |      |      |      |   |                   |      |      |      |      |    |                   |      |      |      |      |    |                  |      |      |      |      |    |                 |   |      |   |      |
|----------------------------------------------------------------------------------------------------------------------------|---------------------------------------------------------------------------------------------------------------------------------------------------------------------------------------------------------------------------------------------------------------------------------------------------------------------------------------------------------------------------------------------------------------------------------------------------------------------------------------------------------------------------------------------------------------------------------------------------------------------------------------------------------------------------------------------------------------------------------------------------------------------------------------------------------------------------------------------------------------------------------------------------------------------------------------------------------------------------------------------------------------------------------------------------------------------------------------------------------------------------------------------------------------------------------------------------------------------------------------------------------------------------------------------------------------------------------------------------------------------------------------------------------------------------------------------------------------------------|----------|-------------|-------------|-------------|-------------|---------|--------|--------------------|------|------|------|------|---|--------------------|------|------|------|------|---|-------------------|---|------|---|------|---|---------------------------------|------|------|------|------|---|-------------------|------|------|------|------|---|------------------|------|------|------|------|---|--------------------|------|------|------|------|---|-------------------|------|------|------|------|---|-------------------|------|------|------|------|----|-------------------|------|------|------|------|----|------------------|------|------|------|------|----|-----------------|---|------|---|------|
| <b>Global test</b><br>System degree of redundancy = 1<br>t-statistic = 24.66, $\chi^2_{1-0.05,1} = 3.84$<br>p-value = 0.00 | Gross error detected                                                                                                                                                                                                                                                                                                                                                                                                                                                                                                                                                                                                                                                                                                                                                                                                                                                                                                                                                                                                                                                                                                                                                                                                                                                                                                                                                                                                                                                      |          |             |             |             |             |         |        |                    |      |      |      |      |   |                    |      |      |      |      |   |                   |   |      |   |      |   |                                 |      |      |      |      |   |                   |      |      |      |      |   |                  |      |      |      |      |   |                    |      |      |      |      |   |                   |      |      |      |      |   |                   |      |      |      |      |    |                   |      |      |      |      |    |                  |      |      |      |      |    |                 |   |      |   |      |
| <b>Measurement test</b><br>Degree of freedom = 1<br>t-statistic <sub>max</sub> = 1.96<br>p-value <sub>min</sub> = 0.03     | no gross error detected                                                                                                                                                                                                                                                                                                                                                                                                                                                                                                                                                                                                                                                                                                                                                                                                                                                                                                                                                                                                                                                                                                                                                                                                                                                                                                                                                                                                                                                   |          |             |             |             |             |         |        |                    |      |      |      |      |   |                    |      |      |      |      |   |                   |   |      |   |      |   |                                 |      |      |      |      |   |                   |      |      |      |      |   |                  |      |      |      |      |   |                    |      |      |      |      |   |                   |      |      |      |      |   |                   |      |      |      |      |    |                   |      |      |      |      |    |                  |      |      |      |      |    |                 |   |      |   |      |
|                                                                                                                            | <table border="1"> <thead> <tr> <th>#</th> <th>Var</th> <th>residual</th> <th>error</th> <th>t-statistic</th> <th>p-value</th> </tr> </thead> <tbody> <tr> <td>1</td> <td>CO<sub>2aer</sub></td> <td>0.00</td> <td>0.00</td> <td>1.50</td> <td>0.07</td> </tr> <tr> <td>2</td> <td>CO<sub>2off</sub></td> <td>0.03</td> <td>0.02</td> <td>1.50</td> <td>0.07</td> </tr> <tr> <td>3</td> <td>COD<sub>in</sub></td> <td>-</td> <td>0.00</td> <td>-</td> <td>0.50</td> </tr> <tr> <td>4</td> <td>N<sub>2</sub>O<sub>off</sub></td> <td>0.06</td> <td>0.04</td> <td>1.50</td> <td>0.07</td> </tr> <tr> <td>5</td> <td>NH<sub>eff</sub></td> <td>1.16</td> <td>0.78</td> <td>1.50</td> <td>0.07</td> </tr> <tr> <td>6</td> <td>NH<sub>in</sub></td> <td>6.20</td> <td>4.14</td> <td>1.50</td> <td>0.07</td> </tr> <tr> <td>7</td> <td>NO<sub>2eff</sub></td> <td>1.38</td> <td>0.92</td> <td>1.50</td> <td>0.07</td> </tr> <tr> <td>8</td> <td>NO<sub>off</sub></td> <td>0.00</td> <td>0.00</td> <td>1.50</td> <td>0.07</td> </tr> <tr> <td>9</td> <td>O<sub>2aer</sub></td> <td>0.00</td> <td>0.00</td> <td>1.50</td> <td>0.07</td> </tr> <tr> <td>10</td> <td>O<sub>2off</sub></td> <td>0.00</td> <td>0.00</td> <td>1.50</td> <td>0.07</td> </tr> <tr> <td>11</td> <td>Q<sub>aer</sub></td> <td>0.08</td> <td>0.05</td> <td>1.50</td> <td>0.07</td> </tr> <tr> <td>12</td> <td>Q<sub>in</sub></td> <td>-</td> <td>0.00</td> <td>-</td> <td>0.50</td> </tr> </tbody> </table> | #        | Var         | residual    | error       | t-statistic | p-value | 1      | CO <sub>2aer</sub> | 0.00 | 0.00 | 1.50 | 0.07 | 2 | CO <sub>2off</sub> | 0.03 | 0.02 | 1.50 | 0.07 | 3 | COD <sub>in</sub> | - | 0.00 | - | 0.50 | 4 | N <sub>2</sub> O <sub>off</sub> | 0.06 | 0.04 | 1.50 | 0.07 | 5 | NH <sub>eff</sub> | 1.16 | 0.78 | 1.50 | 0.07 | 6 | NH <sub>in</sub> | 6.20 | 4.14 | 1.50 | 0.07 | 7 | NO <sub>2eff</sub> | 1.38 | 0.92 | 1.50 | 0.07 | 8 | NO <sub>off</sub> | 0.00 | 0.00 | 1.50 | 0.07 | 9 | O <sub>2aer</sub> | 0.00 | 0.00 | 1.50 | 0.07 | 10 | O <sub>2off</sub> | 0.00 | 0.00 | 1.50 | 0.07 | 11 | Q <sub>aer</sub> | 0.08 | 0.05 | 1.50 | 0.07 | 12 | Q <sub>in</sub> | - | 0.00 | - | 0.50 |
| #                                                                                                                          | Var                                                                                                                                                                                                                                                                                                                                                                                                                                                                                                                                                                                                                                                                                                                                                                                                                                                                                                                                                                                                                                                                                                                                                                                                                                                                                                                                                                                                                                                                       | residual | error       | t-statistic | p-value     |             |         |        |                    |      |      |      |      |   |                    |      |      |      |      |   |                   |   |      |   |      |   |                                 |      |      |      |      |   |                   |      |      |      |      |   |                  |      |      |      |      |   |                    |      |      |      |      |   |                   |      |      |      |      |   |                   |      |      |      |      |    |                   |      |      |      |      |    |                  |      |      |      |      |    |                 |   |      |   |      |
| 1                                                                                                                          | CO <sub>2aer</sub>                                                                                                                                                                                                                                                                                                                                                                                                                                                                                                                                                                                                                                                                                                                                                                                                                                                                                                                                                                                                                                                                                                                                                                                                                                                                                                                                                                                                                                                        | 0.00     | 0.00        | 1.50        | 0.07        |             |         |        |                    |      |      |      |      |   |                    |      |      |      |      |   |                   |   |      |   |      |   |                                 |      |      |      |      |   |                   |      |      |      |      |   |                  |      |      |      |      |   |                    |      |      |      |      |   |                   |      |      |      |      |   |                   |      |      |      |      |    |                   |      |      |      |      |    |                  |      |      |      |      |    |                 |   |      |   |      |
| 2                                                                                                                          | CO <sub>2off</sub>                                                                                                                                                                                                                                                                                                                                                                                                                                                                                                                                                                                                                                                                                                                                                                                                                                                                                                                                                                                                                                                                                                                                                                                                                                                                                                                                                                                                                                                        | 0.03     | 0.02        | 1.50        | 0.07        |             |         |        |                    |      |      |      |      |   |                    |      |      |      |      |   |                   |   |      |   |      |   |                                 |      |      |      |      |   |                   |      |      |      |      |   |                  |      |      |      |      |   |                    |      |      |      |      |   |                   |      |      |      |      |   |                   |      |      |      |      |    |                   |      |      |      |      |    |                  |      |      |      |      |    |                 |   |      |   |      |
| 3                                                                                                                          | COD <sub>in</sub>                                                                                                                                                                                                                                                                                                                                                                                                                                                                                                                                                                                                                                                                                                                                                                                                                                                                                                                                                                                                                                                                                                                                                                                                                                                                                                                                                                                                                                                         | -        | 0.00        | -           | 0.50        |             |         |        |                    |      |      |      |      |   |                    |      |      |      |      |   |                   |   |      |   |      |   |                                 |      |      |      |      |   |                   |      |      |      |      |   |                  |      |      |      |      |   |                    |      |      |      |      |   |                   |      |      |      |      |   |                   |      |      |      |      |    |                   |      |      |      |      |    |                  |      |      |      |      |    |                 |   |      |   |      |
| 4                                                                                                                          | N <sub>2</sub> O <sub>off</sub>                                                                                                                                                                                                                                                                                                                                                                                                                                                                                                                                                                                                                                                                                                                                                                                                                                                                                                                                                                                                                                                                                                                                                                                                                                                                                                                                                                                                                                           | 0.06     | 0.04        | 1.50        | 0.07        |             |         |        |                    |      |      |      |      |   |                    |      |      |      |      |   |                   |   |      |   |      |   |                                 |      |      |      |      |   |                   |      |      |      |      |   |                  |      |      |      |      |   |                    |      |      |      |      |   |                   |      |      |      |      |   |                   |      |      |      |      |    |                   |      |      |      |      |    |                  |      |      |      |      |    |                 |   |      |   |      |
| 5                                                                                                                          | NH <sub>eff</sub>                                                                                                                                                                                                                                                                                                                                                                                                                                                                                                                                                                                                                                                                                                                                                                                                                                                                                                                                                                                                                                                                                                                                                                                                                                                                                                                                                                                                                                                         | 1.16     | 0.78        | 1.50        | 0.07        |             |         |        |                    |      |      |      |      |   |                    |      |      |      |      |   |                   |   |      |   |      |   |                                 |      |      |      |      |   |                   |      |      |      |      |   |                  |      |      |      |      |   |                    |      |      |      |      |   |                   |      |      |      |      |   |                   |      |      |      |      |    |                   |      |      |      |      |    |                  |      |      |      |      |    |                 |   |      |   |      |
| 6                                                                                                                          | NH <sub>in</sub>                                                                                                                                                                                                                                                                                                                                                                                                                                                                                                                                                                                                                                                                                                                                                                                                                                                                                                                                                                                                                                                                                                                                                                                                                                                                                                                                                                                                                                                          | 6.20     | 4.14        | 1.50        | 0.07        |             |         |        |                    |      |      |      |      |   |                    |      |      |      |      |   |                   |   |      |   |      |   |                                 |      |      |      |      |   |                   |      |      |      |      |   |                  |      |      |      |      |   |                    |      |      |      |      |   |                   |      |      |      |      |   |                   |      |      |      |      |    |                   |      |      |      |      |    |                  |      |      |      |      |    |                 |   |      |   |      |
| 7                                                                                                                          | NO <sub>2eff</sub>                                                                                                                                                                                                                                                                                                                                                                                                                                                                                                                                                                                                                                                                                                                                                                                                                                                                                                                                                                                                                                                                                                                                                                                                                                                                                                                                                                                                                                                        | 1.38     | 0.92        | 1.50        | 0.07        |             |         |        |                    |      |      |      |      |   |                    |      |      |      |      |   |                   |   |      |   |      |   |                                 |      |      |      |      |   |                   |      |      |      |      |   |                  |      |      |      |      |   |                    |      |      |      |      |   |                   |      |      |      |      |   |                   |      |      |      |      |    |                   |      |      |      |      |    |                  |      |      |      |      |    |                 |   |      |   |      |
| 8                                                                                                                          | NO <sub>off</sub>                                                                                                                                                                                                                                                                                                                                                                                                                                                                                                                                                                                                                                                                                                                                                                                                                                                                                                                                                                                                                                                                                                                                                                                                                                                                                                                                                                                                                                                         | 0.00     | 0.00        | 1.50        | 0.07        |             |         |        |                    |      |      |      |      |   |                    |      |      |      |      |   |                   |   |      |   |      |   |                                 |      |      |      |      |   |                   |      |      |      |      |   |                  |      |      |      |      |   |                    |      |      |      |      |   |                   |      |      |      |      |   |                   |      |      |      |      |    |                   |      |      |      |      |    |                  |      |      |      |      |    |                 |   |      |   |      |
| 9                                                                                                                          | O <sub>2aer</sub>                                                                                                                                                                                                                                                                                                                                                                                                                                                                                                                                                                                                                                                                                                                                                                                                                                                                                                                                                                                                                                                                                                                                                                                                                                                                                                                                                                                                                                                         | 0.00     | 0.00        | 1.50        | 0.07        |             |         |        |                    |      |      |      |      |   |                    |      |      |      |      |   |                   |   |      |   |      |   |                                 |      |      |      |      |   |                   |      |      |      |      |   |                  |      |      |      |      |   |                    |      |      |      |      |   |                   |      |      |      |      |   |                   |      |      |      |      |    |                   |      |      |      |      |    |                  |      |      |      |      |    |                 |   |      |   |      |
| 10                                                                                                                         | O <sub>2off</sub>                                                                                                                                                                                                                                                                                                                                                                                                                                                                                                                                                                                                                                                                                                                                                                                                                                                                                                                                                                                                                                                                                                                                                                                                                                                                                                                                                                                                                                                         | 0.00     | 0.00        | 1.50        | 0.07        |             |         |        |                    |      |      |      |      |   |                    |      |      |      |      |   |                   |   |      |   |      |   |                                 |      |      |      |      |   |                   |      |      |      |      |   |                  |      |      |      |      |   |                    |      |      |      |      |   |                   |      |      |      |      |   |                   |      |      |      |      |    |                   |      |      |      |      |    |                  |      |      |      |      |    |                 |   |      |   |      |
| 11                                                                                                                         | Q <sub>aer</sub>                                                                                                                                                                                                                                                                                                                                                                                                                                                                                                                                                                                                                                                                                                                                                                                                                                                                                                                                                                                                                                                                                                                                                                                                                                                                                                                                                                                                                                                          | 0.08     | 0.05        | 1.50        | 0.07        |             |         |        |                    |      |      |      |      |   |                    |      |      |      |      |   |                   |   |      |   |      |   |                                 |      |      |      |      |   |                   |      |      |      |      |   |                  |      |      |      |      |   |                    |      |      |      |      |   |                   |      |      |      |      |   |                   |      |      |      |      |    |                   |      |      |      |      |    |                  |      |      |      |      |    |                 |   |      |   |      |
| 12                                                                                                                         | Q <sub>in</sub>                                                                                                                                                                                                                                                                                                                                                                                                                                                                                                                                                                                                                                                                                                                                                                                                                                                                                                                                                                                                                                                                                                                                                                                                                                                                                                                                                                                                                                                           | -        | 0.00        | -           | 0.50        |             |         |        |                    |      |      |      |      |   |                    |      |      |      |      |   |                   |   |      |   |      |   |                                 |      |      |      |      |   |                   |      |      |      |      |   |                  |      |      |      |      |   |                    |      |      |      |      |   |                   |      |      |      |      |   |                   |      |      |      |      |    |                   |      |      |      |      |    |                  |      |      |      |      |    |                 |   |      |   |      |
| <b>Nodal test</b><br>Degree of freedom = 1<br>t-statistic <sub>max</sub> = 1.96<br>p-value <sub>min</sub> = 0.03           | no gross error detected                                                                                                                                                                                                                                                                                                                                                                                                                                                                                                                                                                                                                                                                                                                                                                                                                                                                                                                                                                                                                                                                                                                                                                                                                                                                                                                                                                                                                                                   |          |             |             |             |             |         |        |                    |      |      |      |      |   |                    |      |      |      |      |   |                   |   |      |   |      |   |                                 |      |      |      |      |   |                   |      |      |      |      |   |                  |      |      |      |      |   |                    |      |      |      |      |   |                   |      |      |      |      |   |                   |      |      |      |      |    |                   |      |      |      |      |    |                  |      |      |      |      |    |                 |   |      |   |      |
|                                                                                                                            | <table border="1"> <thead> <tr> <th>#</th> <th>misbalance</th> <th>error</th> <th>t-statistic</th> <th>p-value</th> </tr> </thead> <tbody> <tr> <td>1</td> <td>21,653</td> <td>14,487</td> <td>1.49</td> <td>0.07</td> </tr> </tbody> </table>                                                                                                                                                                                                                                                                                                                                                                                                                                                                                                                                                                                                                                                                                                                                                                                                                                                                                                                                                                                                                                                                                                                                                                                                                            | #        | misbalance  | error       | t-statistic | p-value     | 1       | 21,653 | 14,487             | 1.49 | 0.07 |      |      |   |                    |      |      |      |      |   |                   |   |      |   |      |   |                                 |      |      |      |      |   |                   |      |      |      |      |   |                  |      |      |      |      |   |                    |      |      |      |      |   |                   |      |      |      |      |   |                   |      |      |      |      |    |                   |      |      |      |      |    |                  |      |      |      |      |    |                 |   |      |   |      |
| #                                                                                                                          | misbalance                                                                                                                                                                                                                                                                                                                                                                                                                                                                                                                                                                                                                                                                                                                                                                                                                                                                                                                                                                                                                                                                                                                                                                                                                                                                                                                                                                                                                                                                | error    | t-statistic | p-value     |             |             |         |        |                    |      |      |      |      |   |                    |      |      |      |      |   |                   |   |      |   |      |   |                                 |      |      |      |      |   |                   |      |      |      |      |   |                  |      |      |      |      |   |                    |      |      |      |      |   |                   |      |      |      |      |   |                   |      |      |      |      |    |                   |      |      |      |      |    |                  |      |      |      |      |    |                 |   |      |   |      |
| 1                                                                                                                          | 21,653                                                                                                                                                                                                                                                                                                                                                                                                                                                                                                                                                                                                                                                                                                                                                                                                                                                                                                                                                                                                                                                                                                                                                                                                                                                                                                                                                                                                                                                                    | 14,487   | 1.49        | 0.07        |             |             |         |        |                    |      |      |      |      |   |                    |      |      |      |      |   |                   |   |      |   |      |   |                                 |      |      |      |      |   |                   |      |      |      |      |   |                  |      |      |      |      |   |                    |      |      |      |      |   |                   |      |      |      |      |   |                   |      |      |      |      |    |                   |      |      |      |      |    |                  |      |      |      |      |    |                 |   |      |   |      |

## Results of S9

Table B9a. Data reconciliation (iteration = 3, convergence tolerance =  $2.4 \times 10^{-07}$ , CPU time = 0.7s)

| #  | Var                             | measured   | std  | sD%  | reconciled | std  | sD%   | $\Delta(\%)$ | i(%)  |   |   |
|----|---------------------------------|------------|------|------|------------|------|-------|--------------|-------|---|---|
| 1  | CO <sub>2aer</sub>              | 583        | 11   | 1.86 | 583        | 11   | 1.86  | 100.00       | 0.00  | M | I |
| 2  | CO <sub>2off</sub>              | 26,390     | 305  | 1.15 | 26,391     | 305  | 1.15  | 100.00       | 0.00  | M | I |
| 3  | COD <sub>in</sub>               | 2.78       | 0.01 | 0.36 | 2.78       | 0.01 | 0.36  | 100.00       | 0.00  | M | I |
| 4  | N <sub>2</sub> O <sub>off</sub> | 601        | 15   | 2.53 | 601        | 15   | 2.53  | 100.04       | 0.01  | M | I |
| 5  | NH <sub>eff</sub>               | 39.8       | 2.0  | 5.00 | 40.8       | 1.9  | 4.58  | 102.47       | 6.18  | M | I |
| 6  | NH <sub>in</sub>                | 96.6       | 4.8  | 5.00 | 90.8       | 2.6  | 2.89  | 93.99        | 45.71 | M | I |
| 7  | NO <sub>2eff</sub>              | 48.3       | 2.4  | 5.00 | 49.7       | 2.2  | 4.41  | 102.99       | 9.16  | M | I |
| 8  | NO <sub>3eff</sub>              | 0.4        | 0.0  | 5.00 | 0.4        | 0.0  | 5.00  | 100.03       | 0.00  | M | I |
| 9  | NO <sub>off</sub>               | 30         | 0    | 1.56 | 30         | 0    | 1.56  | 100.00       | 0.00  | M | I |
| 10 | O <sub>2aer</sub>               | 210,674    | 12   | 0.01 | 210,674    | 12   | 0.01  | 100.00       | 0.00  | M | I |
| 11 | O <sub>2off</sub>               | 190,091    | 216  | 0.11 | 190,093    | 216  | 0.11  | 100.00       | 0.00  | M | I |
| 12 | Q <sub>aer</sub>                | 1,938      | 39   | 2    | 1,938      | 39   | 1.99  | 100.00       | 0.00  | M | I |
| 13 | Q <sub>in</sub>                 | 28.10      | 0.10 | 0.34 | 28.10      | 0.10 | 0.34  | 100.00       | 0.00  | M | I |
| #  | Var                             | calculated | std  | sD%  | reconciled | std  | sD%   | $\Delta(\%)$ | i(%)  | M | I |
| 14 | Q <sub>inf</sub>                | 653        | 138  | 21   | 677        | 125  | 18.49 | 103.63       | 9.05  | U | I |
| 15 | Q <sub>off</sub>                | 2,721      | 139  | 5    | 2,801      | 128  | 4.57  | 102.92       | 8.02  | U | I |
| 16 | (TIC:NH) <sub>in</sub>          | 1.00       | 0.07 | 7    | 1.09       | 0.04 | 3.70  | 109.53       | 44.65 | U | I |

Table B9b. Gross error detection

| Test                                                                                                                       | Evaluation                                                                                                                                                                                                                                                                                                                                                                                                                                                                                                                                                                                                                                                                                                                                                                                                                                                                                                                                                                                                                                                                                                                                                                                                                                                                                                                                                                                                       |          |             |             |             |             |         |       |                    |      |      |      |      |   |                    |      |      |      |      |   |                   |   |      |   |      |   |                                 |      |      |      |      |   |                   |      |      |      |      |   |                  |      |      |      |      |   |                    |      |      |      |      |   |                   |      |      |      |      |   |                   |      |      |      |      |    |                   |      |      |      |      |    |                  |      |      |      |      |    |                 |   |      |   |      |
|----------------------------------------------------------------------------------------------------------------------------|------------------------------------------------------------------------------------------------------------------------------------------------------------------------------------------------------------------------------------------------------------------------------------------------------------------------------------------------------------------------------------------------------------------------------------------------------------------------------------------------------------------------------------------------------------------------------------------------------------------------------------------------------------------------------------------------------------------------------------------------------------------------------------------------------------------------------------------------------------------------------------------------------------------------------------------------------------------------------------------------------------------------------------------------------------------------------------------------------------------------------------------------------------------------------------------------------------------------------------------------------------------------------------------------------------------------------------------------------------------------------------------------------------------|----------|-------------|-------------|-------------|-------------|---------|-------|--------------------|------|------|------|------|---|--------------------|------|------|------|------|---|-------------------|---|------|---|------|---|---------------------------------|------|------|------|------|---|-------------------|------|------|------|------|---|------------------|------|------|------|------|---|--------------------|------|------|------|------|---|-------------------|------|------|------|------|---|-------------------|------|------|------|------|----|-------------------|------|------|------|------|----|------------------|------|------|------|------|----|-----------------|---|------|---|------|
| <b>Global test</b><br>System degree of redundancy = 1<br>t-statistic = 22.50, $\chi^2_{1-0.05,1} = 3.84$<br>p-value = 0.00 | Gross error detected                                                                                                                                                                                                                                                                                                                                                                                                                                                                                                                                                                                                                                                                                                                                                                                                                                                                                                                                                                                                                                                                                                                                                                                                                                                                                                                                                                                             |          |             |             |             |             |         |       |                    |      |      |      |      |   |                    |      |      |      |      |   |                   |   |      |   |      |   |                                 |      |      |      |      |   |                   |      |      |      |      |   |                  |      |      |      |      |   |                    |      |      |      |      |   |                   |      |      |      |      |   |                   |      |      |      |      |    |                   |      |      |      |      |    |                  |      |      |      |      |    |                 |   |      |   |      |
| <b>Measurement test</b><br>Degree of freedom = 1<br>t-statistic <sub>max</sub> = 1.96<br>p-value <sub>min</sub> = 0.03     | no gross error detected<br><table border="1"> <thead> <tr> <th>#</th> <th>Var</th> <th>residual</th> <th>error</th> <th>t-statistic</th> <th>p-value</th> </tr> </thead> <tbody> <tr><td>1</td><td>CO<sub>2aer</sub></td><td>0.00</td><td>0.00</td><td>1.43</td><td>0.08</td></tr> <tr><td>2</td><td>CO<sub>2off</sub></td><td>0.79</td><td>0.55</td><td>1.43</td><td>0.08</td></tr> <tr><td>3</td><td>COD<sub>in</sub></td><td>-</td><td>0.00</td><td>-</td><td>0.50</td></tr> <tr><td>4</td><td>N<sub>2</sub>O<sub>off</sub></td><td>0.22</td><td>0.16</td><td>1.43</td><td>0.08</td></tr> <tr><td>5</td><td>NH<sub>eff</sub></td><td>0.98</td><td>0.69</td><td>1.43</td><td>0.08</td></tr> <tr><td>6</td><td>NH<sub>in</sub></td><td>5.80</td><td>4.06</td><td>1.43</td><td>0.08</td></tr> <tr><td>7</td><td>NO<sub>2eff</sub></td><td>1.44</td><td>1.01</td><td>1.43</td><td>0.08</td></tr> <tr><td>8</td><td>NO<sub>off</sub></td><td>0.00</td><td>0.00</td><td>1.43</td><td>0.08</td></tr> <tr><td>9</td><td>O<sub>2aer</sub></td><td>0.00</td><td>0.00</td><td>1.43</td><td>0.08</td></tr> <tr><td>10</td><td>O<sub>2off</sub></td><td>0.01</td><td>0.00</td><td>1.43</td><td>0.08</td></tr> <tr><td>11</td><td>Q<sub>aer</sub></td><td>1.88</td><td>1.31</td><td>1.43</td><td>0.08</td></tr> <tr><td>12</td><td>Q<sub>in</sub></td><td>-</td><td>0.00</td><td>-</td><td>0.50</td></tr> </tbody> </table> | #        | Var         | residual    | error       | t-statistic | p-value | 1     | CO <sub>2aer</sub> | 0.00 | 0.00 | 1.43 | 0.08 | 2 | CO <sub>2off</sub> | 0.79 | 0.55 | 1.43 | 0.08 | 3 | COD <sub>in</sub> | - | 0.00 | - | 0.50 | 4 | N <sub>2</sub> O <sub>off</sub> | 0.22 | 0.16 | 1.43 | 0.08 | 5 | NH <sub>eff</sub> | 0.98 | 0.69 | 1.43 | 0.08 | 6 | NH <sub>in</sub> | 5.80 | 4.06 | 1.43 | 0.08 | 7 | NO <sub>2eff</sub> | 1.44 | 1.01 | 1.43 | 0.08 | 8 | NO <sub>off</sub> | 0.00 | 0.00 | 1.43 | 0.08 | 9 | O <sub>2aer</sub> | 0.00 | 0.00 | 1.43 | 0.08 | 10 | O <sub>2off</sub> | 0.01 | 0.00 | 1.43 | 0.08 | 11 | Q <sub>aer</sub> | 1.88 | 1.31 | 1.43 | 0.08 | 12 | Q <sub>in</sub> | - | 0.00 | - | 0.50 |
| #                                                                                                                          | Var                                                                                                                                                                                                                                                                                                                                                                                                                                                                                                                                                                                                                                                                                                                                                                                                                                                                                                                                                                                                                                                                                                                                                                                                                                                                                                                                                                                                              | residual | error       | t-statistic | p-value     |             |         |       |                    |      |      |      |      |   |                    |      |      |      |      |   |                   |   |      |   |      |   |                                 |      |      |      |      |   |                   |      |      |      |      |   |                  |      |      |      |      |   |                    |      |      |      |      |   |                   |      |      |      |      |   |                   |      |      |      |      |    |                   |      |      |      |      |    |                  |      |      |      |      |    |                 |   |      |   |      |
| 1                                                                                                                          | CO <sub>2aer</sub>                                                                                                                                                                                                                                                                                                                                                                                                                                                                                                                                                                                                                                                                                                                                                                                                                                                                                                                                                                                                                                                                                                                                                                                                                                                                                                                                                                                               | 0.00     | 0.00        | 1.43        | 0.08        |             |         |       |                    |      |      |      |      |   |                    |      |      |      |      |   |                   |   |      |   |      |   |                                 |      |      |      |      |   |                   |      |      |      |      |   |                  |      |      |      |      |   |                    |      |      |      |      |   |                   |      |      |      |      |   |                   |      |      |      |      |    |                   |      |      |      |      |    |                  |      |      |      |      |    |                 |   |      |   |      |
| 2                                                                                                                          | CO <sub>2off</sub>                                                                                                                                                                                                                                                                                                                                                                                                                                                                                                                                                                                                                                                                                                                                                                                                                                                                                                                                                                                                                                                                                                                                                                                                                                                                                                                                                                                               | 0.79     | 0.55        | 1.43        | 0.08        |             |         |       |                    |      |      |      |      |   |                    |      |      |      |      |   |                   |   |      |   |      |   |                                 |      |      |      |      |   |                   |      |      |      |      |   |                  |      |      |      |      |   |                    |      |      |      |      |   |                   |      |      |      |      |   |                   |      |      |      |      |    |                   |      |      |      |      |    |                  |      |      |      |      |    |                 |   |      |   |      |
| 3                                                                                                                          | COD <sub>in</sub>                                                                                                                                                                                                                                                                                                                                                                                                                                                                                                                                                                                                                                                                                                                                                                                                                                                                                                                                                                                                                                                                                                                                                                                                                                                                                                                                                                                                | -        | 0.00        | -           | 0.50        |             |         |       |                    |      |      |      |      |   |                    |      |      |      |      |   |                   |   |      |   |      |   |                                 |      |      |      |      |   |                   |      |      |      |      |   |                  |      |      |      |      |   |                    |      |      |      |      |   |                   |      |      |      |      |   |                   |      |      |      |      |    |                   |      |      |      |      |    |                  |      |      |      |      |    |                 |   |      |   |      |
| 4                                                                                                                          | N <sub>2</sub> O <sub>off</sub>                                                                                                                                                                                                                                                                                                                                                                                                                                                                                                                                                                                                                                                                                                                                                                                                                                                                                                                                                                                                                                                                                                                                                                                                                                                                                                                                                                                  | 0.22     | 0.16        | 1.43        | 0.08        |             |         |       |                    |      |      |      |      |   |                    |      |      |      |      |   |                   |   |      |   |      |   |                                 |      |      |      |      |   |                   |      |      |      |      |   |                  |      |      |      |      |   |                    |      |      |      |      |   |                   |      |      |      |      |   |                   |      |      |      |      |    |                   |      |      |      |      |    |                  |      |      |      |      |    |                 |   |      |   |      |
| 5                                                                                                                          | NH <sub>eff</sub>                                                                                                                                                                                                                                                                                                                                                                                                                                                                                                                                                                                                                                                                                                                                                                                                                                                                                                                                                                                                                                                                                                                                                                                                                                                                                                                                                                                                | 0.98     | 0.69        | 1.43        | 0.08        |             |         |       |                    |      |      |      |      |   |                    |      |      |      |      |   |                   |   |      |   |      |   |                                 |      |      |      |      |   |                   |      |      |      |      |   |                  |      |      |      |      |   |                    |      |      |      |      |   |                   |      |      |      |      |   |                   |      |      |      |      |    |                   |      |      |      |      |    |                  |      |      |      |      |    |                 |   |      |   |      |
| 6                                                                                                                          | NH <sub>in</sub>                                                                                                                                                                                                                                                                                                                                                                                                                                                                                                                                                                                                                                                                                                                                                                                                                                                                                                                                                                                                                                                                                                                                                                                                                                                                                                                                                                                                 | 5.80     | 4.06        | 1.43        | 0.08        |             |         |       |                    |      |      |      |      |   |                    |      |      |      |      |   |                   |   |      |   |      |   |                                 |      |      |      |      |   |                   |      |      |      |      |   |                  |      |      |      |      |   |                    |      |      |      |      |   |                   |      |      |      |      |   |                   |      |      |      |      |    |                   |      |      |      |      |    |                  |      |      |      |      |    |                 |   |      |   |      |
| 7                                                                                                                          | NO <sub>2eff</sub>                                                                                                                                                                                                                                                                                                                                                                                                                                                                                                                                                                                                                                                                                                                                                                                                                                                                                                                                                                                                                                                                                                                                                                                                                                                                                                                                                                                               | 1.44     | 1.01        | 1.43        | 0.08        |             |         |       |                    |      |      |      |      |   |                    |      |      |      |      |   |                   |   |      |   |      |   |                                 |      |      |      |      |   |                   |      |      |      |      |   |                  |      |      |      |      |   |                    |      |      |      |      |   |                   |      |      |      |      |   |                   |      |      |      |      |    |                   |      |      |      |      |    |                  |      |      |      |      |    |                 |   |      |   |      |
| 8                                                                                                                          | NO <sub>off</sub>                                                                                                                                                                                                                                                                                                                                                                                                                                                                                                                                                                                                                                                                                                                                                                                                                                                                                                                                                                                                                                                                                                                                                                                                                                                                                                                                                                                                | 0.00     | 0.00        | 1.43        | 0.08        |             |         |       |                    |      |      |      |      |   |                    |      |      |      |      |   |                   |   |      |   |      |   |                                 |      |      |      |      |   |                   |      |      |      |      |   |                  |      |      |      |      |   |                    |      |      |      |      |   |                   |      |      |      |      |   |                   |      |      |      |      |    |                   |      |      |      |      |    |                  |      |      |      |      |    |                 |   |      |   |      |
| 9                                                                                                                          | O <sub>2aer</sub>                                                                                                                                                                                                                                                                                                                                                                                                                                                                                                                                                                                                                                                                                                                                                                                                                                                                                                                                                                                                                                                                                                                                                                                                                                                                                                                                                                                                | 0.00     | 0.00        | 1.43        | 0.08        |             |         |       |                    |      |      |      |      |   |                    |      |      |      |      |   |                   |   |      |   |      |   |                                 |      |      |      |      |   |                   |      |      |      |      |   |                  |      |      |      |      |   |                    |      |      |      |      |   |                   |      |      |      |      |   |                   |      |      |      |      |    |                   |      |      |      |      |    |                  |      |      |      |      |    |                 |   |      |   |      |
| 10                                                                                                                         | O <sub>2off</sub>                                                                                                                                                                                                                                                                                                                                                                                                                                                                                                                                                                                                                                                                                                                                                                                                                                                                                                                                                                                                                                                                                                                                                                                                                                                                                                                                                                                                | 0.01     | 0.00        | 1.43        | 0.08        |             |         |       |                    |      |      |      |      |   |                    |      |      |      |      |   |                   |   |      |   |      |   |                                 |      |      |      |      |   |                   |      |      |      |      |   |                  |      |      |      |      |   |                    |      |      |      |      |   |                   |      |      |      |      |   |                   |      |      |      |      |    |                   |      |      |      |      |    |                  |      |      |      |      |    |                 |   |      |   |      |
| 11                                                                                                                         | Q <sub>aer</sub>                                                                                                                                                                                                                                                                                                                                                                                                                                                                                                                                                                                                                                                                                                                                                                                                                                                                                                                                                                                                                                                                                                                                                                                                                                                                                                                                                                                                 | 1.88     | 1.31        | 1.43        | 0.08        |             |         |       |                    |      |      |      |      |   |                    |      |      |      |      |   |                   |   |      |   |      |   |                                 |      |      |      |      |   |                   |      |      |      |      |   |                  |      |      |      |      |   |                    |      |      |      |      |   |                   |      |      |      |      |   |                   |      |      |      |      |    |                   |      |      |      |      |    |                  |      |      |      |      |    |                 |   |      |   |      |
| 12                                                                                                                         | Q <sub>in</sub>                                                                                                                                                                                                                                                                                                                                                                                                                                                                                                                                                                                                                                                                                                                                                                                                                                                                                                                                                                                                                                                                                                                                                                                                                                                                                                                                                                                                  | -        | 0.00        | -           | 0.50        |             |         |       |                    |      |      |      |      |   |                    |      |      |      |      |   |                   |   |      |   |      |   |                                 |      |      |      |      |   |                   |      |      |      |      |   |                  |      |      |      |      |   |                    |      |      |      |      |   |                   |      |      |      |      |   |                   |      |      |      |      |    |                   |      |      |      |      |    |                  |      |      |      |      |    |                 |   |      |   |      |
| <b>Nodal test</b><br>Degree of freedom = 1<br>t-statistic <sub>max</sub> = 1.96<br>p-value <sub>min</sub> = 0.03           | no gross error detected<br><table border="1"> <thead> <tr> <th>#</th> <th>misbalance</th> <th>error</th> <th>t-statistic</th> <th>p-value</th> </tr> </thead> <tbody> <tr><td>1</td><td>7,163</td><td>5,015</td><td>1.43</td><td>0.08</td></tr> </tbody> </table>                                                                                                                                                                                                                                                                                                                                                                                                                                                                                                                                                                                                                                                                                                                                                                                                                                                                                                                                                                                                                                                                                                                                                | #        | misbalance  | error       | t-statistic | p-value     | 1       | 7,163 | 5,015              | 1.43 | 0.08 |      |      |   |                    |      |      |      |      |   |                   |   |      |   |      |   |                                 |      |      |      |      |   |                   |      |      |      |      |   |                  |      |      |      |      |   |                    |      |      |      |      |   |                   |      |      |      |      |   |                   |      |      |      |      |    |                   |      |      |      |      |    |                  |      |      |      |      |    |                 |   |      |   |      |
| #                                                                                                                          | misbalance                                                                                                                                                                                                                                                                                                                                                                                                                                                                                                                                                                                                                                                                                                                                                                                                                                                                                                                                                                                                                                                                                                                                                                                                                                                                                                                                                                                                       | error    | t-statistic | p-value     |             |             |         |       |                    |      |      |      |      |   |                    |      |      |      |      |   |                   |   |      |   |      |   |                                 |      |      |      |      |   |                   |      |      |      |      |   |                  |      |      |      |      |   |                    |      |      |      |      |   |                   |      |      |      |      |   |                   |      |      |      |      |    |                   |      |      |      |      |    |                  |      |      |      |      |    |                 |   |      |   |      |
| 1                                                                                                                          | 7,163                                                                                                                                                                                                                                                                                                                                                                                                                                                                                                                                                                                                                                                                                                                                                                                                                                                                                                                                                                                                                                                                                                                                                                                                                                                                                                                                                                                                            | 5,015    | 1.43        | 0.08        |             |             |         |       |                    |      |      |      |      |   |                    |      |      |      |      |   |                   |   |      |   |      |   |                                 |      |      |      |      |   |                   |      |      |      |      |   |                  |      |      |      |      |   |                    |      |      |      |      |   |                   |      |      |      |      |   |                   |      |      |      |      |    |                   |      |      |      |      |    |                  |      |      |      |      |    |                 |   |      |   |      |

## Results of S10

Table B10a. Data reconciliation (iteration = 3, convergence tolerance =  $1.4 \times 10^{-07}$ , CPU time = 0.7s)

| #  | Var                             | measured   | std  | sD%  | reconciled | std  | sD%   | $\Delta(\%)$ | i(%)  | M | I |
|----|---------------------------------|------------|------|------|------------|------|-------|--------------|-------|---|---|
| 1  | CO <sub>2aer</sub>              | 484        | 1    | 0.12 | 484        | 1    | 0.12  | 100.00       | 0.00  | M | I |
| 2  | CO <sub>2off</sub>              | 23,938     | 247  | 1.03 | 23,939     | 247  | 1.03  | 100.00       | 0.00  | M | I |
| 3  | COD <sub>in</sub>               | 2.78       | 0.01 | 0.36 | 2.78       | 0.01 | 0.36  | 100.00       | 0.00  | M | I |
| 4  | N <sub>2</sub> O <sub>off</sub> | 594        | 15   | 2.45 | 595        | 15   | 2.45  | 100.04       | 0.01  | M | I |
| 5  | NH <sub>eff</sub>               | 42.1       | 2.1  | 5.00 | 43.4       | 2.0  | 4.52  | 102.91       | 7.03  | M | I |
| 6  | NH <sub>in</sub>                | 96.5       | 4.8  | 5.00 | 90.1       | 2.6  | 2.88  | 93.35        | 46.27 | M | I |
| 7  | NO <sub>2eff</sub>              | 44.7       | 2.2  | 5.00 | 46.1       | 2.1  | 4.46  | 103.08       | 7.96  | M | I |
| 8  | NO <sub>3eff</sub>              | 0.5        | 0.0  | 5.00 | 0.5        | 0.0  | 5.00  | 100.04       | 0.00  | M | I |
| 9  | NO <sub>off</sub>               | 28         | 0    | 1.45 | 28         | 0    | 1.45  | 100.00       | 0.00  | M | I |
| 10 | O <sub>2aer</sub>               | 210,184    | 11   | 0.01 | 210,184    | 11   | 0.01  | 100.00       | 0.00  | M | I |
| 11 | O <sub>2off</sub>               | 191,631    | 176  | 0.09 | 191,632    | 176  | 0.09  | 100.00       | 0.00  | M | I |
| 12 | Q <sub>aer</sub>                | 1,735      | 31   | 2    | 1,735      | 31   | 1.76  | 100.00       | 0.00  | M | I |
| 13 | Q <sub>in</sub>                 | 25.73      | 0.03 | 0.11 | 25.73      | 0.03 | 0.11  | 100.00       | 0.00  | M | I |
| #  | Var                             | calculated | std  | sD%  | reconciled | std  | sD%   | $\Delta(\%)$ | i(%)  | M | I |
| 14 | Q <sub>inf</sub>                | 732        | 128  | 17   | 797        | 119  | 14.89 | 108.91       | 7.03  | U | I |
| 15 | Q <sub>off</sub>                | 2,589      | 130  | 5    | 2,667      | 121  | 4.54  | 103.00       | 7.12  | U | I |
| 16 | (TIC:NH) <sub>in</sub>          | 0.94       | 0.07 | 7    | 1.04       | 0.04 | 3.76  | 110.37       | 42.73 | U | I |

Table B10b. Gross error detection

| Test                                                                                                                       | Evaluation                                                                                                                                                                                                                                                                                                                                                                                                                                                                                                                                                                                                                                                                                                                                                                                                                                                                                                                                                                                                                                                                                                                                                                                                                                                                                                                                                                                                                                                                |          |             |             |             |             |         |       |                    |      |      |      |      |   |                    |      |      |      |      |   |                   |   |      |   |      |   |                                 |      |      |      |      |   |                   |      |      |      |      |   |                  |      |      |      |      |   |                    |      |      |      |      |   |                   |      |      |      |      |   |                   |      |      |      |      |    |                   |      |      |      |      |    |                  |      |      |      |      |    |                 |   |      |   |      |
|----------------------------------------------------------------------------------------------------------------------------|---------------------------------------------------------------------------------------------------------------------------------------------------------------------------------------------------------------------------------------------------------------------------------------------------------------------------------------------------------------------------------------------------------------------------------------------------------------------------------------------------------------------------------------------------------------------------------------------------------------------------------------------------------------------------------------------------------------------------------------------------------------------------------------------------------------------------------------------------------------------------------------------------------------------------------------------------------------------------------------------------------------------------------------------------------------------------------------------------------------------------------------------------------------------------------------------------------------------------------------------------------------------------------------------------------------------------------------------------------------------------------------------------------------------------------------------------------------------------|----------|-------------|-------------|-------------|-------------|---------|-------|--------------------|------|------|------|------|---|--------------------|------|------|------|------|---|-------------------|---|------|---|------|---|---------------------------------|------|------|------|------|---|-------------------|------|------|------|------|---|------------------|------|------|------|------|---|--------------------|------|------|------|------|---|-------------------|------|------|------|------|---|-------------------|------|------|------|------|----|-------------------|------|------|------|------|----|------------------|------|------|------|------|----|-----------------|---|------|---|------|
| <b>Global test</b><br>System degree of redundancy = 1<br>t-statistic = 27.38, $\chi^2_{1-0.05,1} = 3.84$<br>p-value = 0.00 | Gross error detected                                                                                                                                                                                                                                                                                                                                                                                                                                                                                                                                                                                                                                                                                                                                                                                                                                                                                                                                                                                                                                                                                                                                                                                                                                                                                                                                                                                                                                                      |          |             |             |             |             |         |       |                    |      |      |      |      |   |                    |      |      |      |      |   |                   |   |      |   |      |   |                                 |      |      |      |      |   |                   |      |      |      |      |   |                  |      |      |      |      |   |                    |      |      |      |      |   |                   |      |      |      |      |   |                   |      |      |      |      |    |                   |      |      |      |      |    |                  |      |      |      |      |    |                 |   |      |   |      |
| <b>Measurement test</b><br>Degree of freedom = 1<br>t-statistic <sub>max</sub> = 1.96<br>p-value <sub>min</sub> = 0.03     | no gross error detected                                                                                                                                                                                                                                                                                                                                                                                                                                                                                                                                                                                                                                                                                                                                                                                                                                                                                                                                                                                                                                                                                                                                                                                                                                                                                                                                                                                                                                                   |          |             |             |             |             |         |       |                    |      |      |      |      |   |                    |      |      |      |      |   |                   |   |      |   |      |   |                                 |      |      |      |      |   |                   |      |      |      |      |   |                  |      |      |      |      |   |                    |      |      |      |      |   |                   |      |      |      |      |   |                   |      |      |      |      |    |                   |      |      |      |      |    |                  |      |      |      |      |    |                 |   |      |   |      |
|                                                                                                                            | <table border="1"> <thead> <tr> <th>#</th> <th>Var</th> <th>residual</th> <th>error</th> <th>t-statistic</th> <th>p-value</th> </tr> </thead> <tbody> <tr> <td>1</td> <td>CO<sub>2aer</sub></td> <td>0.00</td> <td>0.00</td> <td>1.58</td> <td>0.06</td> </tr> <tr> <td>2</td> <td>CO<sub>2off</sub></td> <td>0.65</td> <td>0.41</td> <td>1.58</td> <td>0.06</td> </tr> <tr> <td>3</td> <td>COD<sub>in</sub></td> <td>-</td> <td>0.00</td> <td>-</td> <td>0.50</td> </tr> <tr> <td>4</td> <td>N<sub>2</sub>O<sub>off</sub></td> <td>0.24</td> <td>0.15</td> <td>1.58</td> <td>0.06</td> </tr> <tr> <td>5</td> <td>NH<sub>eff</sub></td> <td>1.22</td> <td>0.78</td> <td>1.58</td> <td>0.06</td> </tr> <tr> <td>6</td> <td>NH<sub>in</sub></td> <td>6.42</td> <td>4.07</td> <td>1.58</td> <td>0.06</td> </tr> <tr> <td>7</td> <td>NO<sub>2eff</sub></td> <td>1.38</td> <td>0.87</td> <td>1.58</td> <td>0.06</td> </tr> <tr> <td>8</td> <td>NO<sub>off</sub></td> <td>0.00</td> <td>0.00</td> <td>1.58</td> <td>0.06</td> </tr> <tr> <td>9</td> <td>O<sub>2aer</sub></td> <td>0.00</td> <td>0.00</td> <td>1.58</td> <td>0.06</td> </tr> <tr> <td>10</td> <td>O<sub>2off</sub></td> <td>0.01</td> <td>0.00</td> <td>1.58</td> <td>0.06</td> </tr> <tr> <td>11</td> <td>Q<sub>aer</sub></td> <td>1.59</td> <td>1.01</td> <td>1.58</td> <td>0.06</td> </tr> <tr> <td>12</td> <td>Q<sub>in</sub></td> <td>-</td> <td>0.00</td> <td>-</td> <td>0.50</td> </tr> </tbody> </table> | #        | Var         | residual    | error       | t-statistic | p-value | 1     | CO <sub>2aer</sub> | 0.00 | 0.00 | 1.58 | 0.06 | 2 | CO <sub>2off</sub> | 0.65 | 0.41 | 1.58 | 0.06 | 3 | COD <sub>in</sub> | - | 0.00 | - | 0.50 | 4 | N <sub>2</sub> O <sub>off</sub> | 0.24 | 0.15 | 1.58 | 0.06 | 5 | NH <sub>eff</sub> | 1.22 | 0.78 | 1.58 | 0.06 | 6 | NH <sub>in</sub> | 6.42 | 4.07 | 1.58 | 0.06 | 7 | NO <sub>2eff</sub> | 1.38 | 0.87 | 1.58 | 0.06 | 8 | NO <sub>off</sub> | 0.00 | 0.00 | 1.58 | 0.06 | 9 | O <sub>2aer</sub> | 0.00 | 0.00 | 1.58 | 0.06 | 10 | O <sub>2off</sub> | 0.01 | 0.00 | 1.58 | 0.06 | 11 | Q <sub>aer</sub> | 1.59 | 1.01 | 1.58 | 0.06 | 12 | Q <sub>in</sub> | - | 0.00 | - | 0.50 |
| #                                                                                                                          | Var                                                                                                                                                                                                                                                                                                                                                                                                                                                                                                                                                                                                                                                                                                                                                                                                                                                                                                                                                                                                                                                                                                                                                                                                                                                                                                                                                                                                                                                                       | residual | error       | t-statistic | p-value     |             |         |       |                    |      |      |      |      |   |                    |      |      |      |      |   |                   |   |      |   |      |   |                                 |      |      |      |      |   |                   |      |      |      |      |   |                  |      |      |      |      |   |                    |      |      |      |      |   |                   |      |      |      |      |   |                   |      |      |      |      |    |                   |      |      |      |      |    |                  |      |      |      |      |    |                 |   |      |   |      |
| 1                                                                                                                          | CO <sub>2aer</sub>                                                                                                                                                                                                                                                                                                                                                                                                                                                                                                                                                                                                                                                                                                                                                                                                                                                                                                                                                                                                                                                                                                                                                                                                                                                                                                                                                                                                                                                        | 0.00     | 0.00        | 1.58        | 0.06        |             |         |       |                    |      |      |      |      |   |                    |      |      |      |      |   |                   |   |      |   |      |   |                                 |      |      |      |      |   |                   |      |      |      |      |   |                  |      |      |      |      |   |                    |      |      |      |      |   |                   |      |      |      |      |   |                   |      |      |      |      |    |                   |      |      |      |      |    |                  |      |      |      |      |    |                 |   |      |   |      |
| 2                                                                                                                          | CO <sub>2off</sub>                                                                                                                                                                                                                                                                                                                                                                                                                                                                                                                                                                                                                                                                                                                                                                                                                                                                                                                                                                                                                                                                                                                                                                                                                                                                                                                                                                                                                                                        | 0.65     | 0.41        | 1.58        | 0.06        |             |         |       |                    |      |      |      |      |   |                    |      |      |      |      |   |                   |   |      |   |      |   |                                 |      |      |      |      |   |                   |      |      |      |      |   |                  |      |      |      |      |   |                    |      |      |      |      |   |                   |      |      |      |      |   |                   |      |      |      |      |    |                   |      |      |      |      |    |                  |      |      |      |      |    |                 |   |      |   |      |
| 3                                                                                                                          | COD <sub>in</sub>                                                                                                                                                                                                                                                                                                                                                                                                                                                                                                                                                                                                                                                                                                                                                                                                                                                                                                                                                                                                                                                                                                                                                                                                                                                                                                                                                                                                                                                         | -        | 0.00        | -           | 0.50        |             |         |       |                    |      |      |      |      |   |                    |      |      |      |      |   |                   |   |      |   |      |   |                                 |      |      |      |      |   |                   |      |      |      |      |   |                  |      |      |      |      |   |                    |      |      |      |      |   |                   |      |      |      |      |   |                   |      |      |      |      |    |                   |      |      |      |      |    |                  |      |      |      |      |    |                 |   |      |   |      |
| 4                                                                                                                          | N <sub>2</sub> O <sub>off</sub>                                                                                                                                                                                                                                                                                                                                                                                                                                                                                                                                                                                                                                                                                                                                                                                                                                                                                                                                                                                                                                                                                                                                                                                                                                                                                                                                                                                                                                           | 0.24     | 0.15        | 1.58        | 0.06        |             |         |       |                    |      |      |      |      |   |                    |      |      |      |      |   |                   |   |      |   |      |   |                                 |      |      |      |      |   |                   |      |      |      |      |   |                  |      |      |      |      |   |                    |      |      |      |      |   |                   |      |      |      |      |   |                   |      |      |      |      |    |                   |      |      |      |      |    |                  |      |      |      |      |    |                 |   |      |   |      |
| 5                                                                                                                          | NH <sub>eff</sub>                                                                                                                                                                                                                                                                                                                                                                                                                                                                                                                                                                                                                                                                                                                                                                                                                                                                                                                                                                                                                                                                                                                                                                                                                                                                                                                                                                                                                                                         | 1.22     | 0.78        | 1.58        | 0.06        |             |         |       |                    |      |      |      |      |   |                    |      |      |      |      |   |                   |   |      |   |      |   |                                 |      |      |      |      |   |                   |      |      |      |      |   |                  |      |      |      |      |   |                    |      |      |      |      |   |                   |      |      |      |      |   |                   |      |      |      |      |    |                   |      |      |      |      |    |                  |      |      |      |      |    |                 |   |      |   |      |
| 6                                                                                                                          | NH <sub>in</sub>                                                                                                                                                                                                                                                                                                                                                                                                                                                                                                                                                                                                                                                                                                                                                                                                                                                                                                                                                                                                                                                                                                                                                                                                                                                                                                                                                                                                                                                          | 6.42     | 4.07        | 1.58        | 0.06        |             |         |       |                    |      |      |      |      |   |                    |      |      |      |      |   |                   |   |      |   |      |   |                                 |      |      |      |      |   |                   |      |      |      |      |   |                  |      |      |      |      |   |                    |      |      |      |      |   |                   |      |      |      |      |   |                   |      |      |      |      |    |                   |      |      |      |      |    |                  |      |      |      |      |    |                 |   |      |   |      |
| 7                                                                                                                          | NO <sub>2eff</sub>                                                                                                                                                                                                                                                                                                                                                                                                                                                                                                                                                                                                                                                                                                                                                                                                                                                                                                                                                                                                                                                                                                                                                                                                                                                                                                                                                                                                                                                        | 1.38     | 0.87        | 1.58        | 0.06        |             |         |       |                    |      |      |      |      |   |                    |      |      |      |      |   |                   |   |      |   |      |   |                                 |      |      |      |      |   |                   |      |      |      |      |   |                  |      |      |      |      |   |                    |      |      |      |      |   |                   |      |      |      |      |   |                   |      |      |      |      |    |                   |      |      |      |      |    |                  |      |      |      |      |    |                 |   |      |   |      |
| 8                                                                                                                          | NO <sub>off</sub>                                                                                                                                                                                                                                                                                                                                                                                                                                                                                                                                                                                                                                                                                                                                                                                                                                                                                                                                                                                                                                                                                                                                                                                                                                                                                                                                                                                                                                                         | 0.00     | 0.00        | 1.58        | 0.06        |             |         |       |                    |      |      |      |      |   |                    |      |      |      |      |   |                   |   |      |   |      |   |                                 |      |      |      |      |   |                   |      |      |      |      |   |                  |      |      |      |      |   |                    |      |      |      |      |   |                   |      |      |      |      |   |                   |      |      |      |      |    |                   |      |      |      |      |    |                  |      |      |      |      |    |                 |   |      |   |      |
| 9                                                                                                                          | O <sub>2aer</sub>                                                                                                                                                                                                                                                                                                                                                                                                                                                                                                                                                                                                                                                                                                                                                                                                                                                                                                                                                                                                                                                                                                                                                                                                                                                                                                                                                                                                                                                         | 0.00     | 0.00        | 1.58        | 0.06        |             |         |       |                    |      |      |      |      |   |                    |      |      |      |      |   |                   |   |      |   |      |   |                                 |      |      |      |      |   |                   |      |      |      |      |   |                  |      |      |      |      |   |                    |      |      |      |      |   |                   |      |      |      |      |   |                   |      |      |      |      |    |                   |      |      |      |      |    |                  |      |      |      |      |    |                 |   |      |   |      |
| 10                                                                                                                         | O <sub>2off</sub>                                                                                                                                                                                                                                                                                                                                                                                                                                                                                                                                                                                                                                                                                                                                                                                                                                                                                                                                                                                                                                                                                                                                                                                                                                                                                                                                                                                                                                                         | 0.01     | 0.00        | 1.58        | 0.06        |             |         |       |                    |      |      |      |      |   |                    |      |      |      |      |   |                   |   |      |   |      |   |                                 |      |      |      |      |   |                   |      |      |      |      |   |                  |      |      |      |      |   |                    |      |      |      |      |   |                   |      |      |      |      |   |                   |      |      |      |      |    |                   |      |      |      |      |    |                  |      |      |      |      |    |                 |   |      |   |      |
| 11                                                                                                                         | Q <sub>aer</sub>                                                                                                                                                                                                                                                                                                                                                                                                                                                                                                                                                                                                                                                                                                                                                                                                                                                                                                                                                                                                                                                                                                                                                                                                                                                                                                                                                                                                                                                          | 1.59     | 1.01        | 1.58        | 0.06        |             |         |       |                    |      |      |      |      |   |                    |      |      |      |      |   |                   |   |      |   |      |   |                                 |      |      |      |      |   |                   |      |      |      |      |   |                  |      |      |      |      |   |                    |      |      |      |      |   |                   |      |      |      |      |   |                   |      |      |      |      |    |                   |      |      |      |      |    |                  |      |      |      |      |    |                 |   |      |   |      |
| 12                                                                                                                         | Q <sub>in</sub>                                                                                                                                                                                                                                                                                                                                                                                                                                                                                                                                                                                                                                                                                                                                                                                                                                                                                                                                                                                                                                                                                                                                                                                                                                                                                                                                                                                                                                                           | -        | 0.00        | -           | 0.50        |             |         |       |                    |      |      |      |      |   |                    |      |      |      |      |   |                   |   |      |   |      |   |                                 |      |      |      |      |   |                   |      |      |      |      |   |                  |      |      |      |      |   |                    |      |      |      |      |   |                   |      |      |      |      |   |                   |      |      |      |      |    |                   |      |      |      |      |    |                  |      |      |      |      |    |                 |   |      |   |      |
| <b>Nodal test</b><br>Degree of freedom = 1<br>t-statistic <sub>max</sub> = 1.96<br>p-value <sub>min</sub> = 0.03           | no gross error detected                                                                                                                                                                                                                                                                                                                                                                                                                                                                                                                                                                                                                                                                                                                                                                                                                                                                                                                                                                                                                                                                                                                                                                                                                                                                                                                                                                                                                                                   |          |             |             |             |             |         |       |                    |      |      |      |      |   |                    |      |      |      |      |   |                   |   |      |   |      |   |                                 |      |      |      |      |   |                   |      |      |      |      |   |                  |      |      |      |      |   |                    |      |      |      |      |   |                   |      |      |      |      |   |                   |      |      |      |      |    |                   |      |      |      |      |    |                  |      |      |      |      |    |                 |   |      |   |      |
|                                                                                                                            | <table border="1"> <thead> <tr> <th>#</th> <th>misbalance</th> <th>error</th> <th>t-statistic</th> <th>p-value</th> </tr> </thead> <tbody> <tr> <td>1</td> <td>6,534</td> <td>4,148</td> <td>1.58</td> <td>0.06</td> </tr> </tbody> </table>                                                                                                                                                                                                                                                                                                                                                                                                                                                                                                                                                                                                                                                                                                                                                                                                                                                                                                                                                                                                                                                                                                                                                                                                                              | #        | misbalance  | error       | t-statistic | p-value     | 1       | 6,534 | 4,148              | 1.58 | 0.06 |      |      |   |                    |      |      |      |      |   |                   |   |      |   |      |   |                                 |      |      |      |      |   |                   |      |      |      |      |   |                  |      |      |      |      |   |                    |      |      |      |      |   |                   |      |      |      |      |   |                   |      |      |      |      |    |                   |      |      |      |      |    |                  |      |      |      |      |    |                 |   |      |   |      |
| #                                                                                                                          | misbalance                                                                                                                                                                                                                                                                                                                                                                                                                                                                                                                                                                                                                                                                                                                                                                                                                                                                                                                                                                                                                                                                                                                                                                                                                                                                                                                                                                                                                                                                | error    | t-statistic | p-value     |             |             |         |       |                    |      |      |      |      |   |                    |      |      |      |      |   |                   |   |      |   |      |   |                                 |      |      |      |      |   |                   |      |      |      |      |   |                  |      |      |      |      |   |                    |      |      |      |      |   |                   |      |      |      |      |   |                   |      |      |      |      |    |                   |      |      |      |      |    |                  |      |      |      |      |    |                 |   |      |   |      |
| 1                                                                                                                          | 6,534                                                                                                                                                                                                                                                                                                                                                                                                                                                                                                                                                                                                                                                                                                                                                                                                                                                                                                                                                                                                                                                                                                                                                                                                                                                                                                                                                                                                                                                                     | 4,148    | 1.58        | 0.06        |             |             |         |       |                    |      |      |      |      |   |                    |      |      |      |      |   |                   |   |      |   |      |   |                                 |      |      |      |      |   |                   |      |      |      |      |   |                  |      |      |      |      |   |                    |      |      |      |      |   |                   |      |      |      |      |   |                   |      |      |      |      |    |                   |      |      |      |      |    |                  |      |      |      |      |    |                 |   |      |   |      |



## Results for S11

Table B11a. Data reconciliation (iteration = 3, convergence tolerance =  $6.7 \times 10^{-9}$ , CPU time = 0.7s)

| #  | Var                             | measured   | std  | sD%  | reconciled | std  | sD%   | $\Delta(\%)$ | i(%)  | M | I |
|----|---------------------------------|------------|------|------|------------|------|-------|--------------|-------|---|---|
| 1  | CO <sub>2aer</sub>              | 529        | 10   | 1.85 | 529        | 10   | 1.85  | 100.00       | 0.00  | M | I |
| 2  | CO <sub>2off</sub>              | 24,260     | 318  | 1.31 | 24,260     | 318  | 1.31  | 100.00       | 0.00  | M | I |
| 3  | COD <sub>in</sub>               | 2.78       | 0.01 | 0.36 | 2.78       | 0.01 | 0.36  | 100.00       | 0.00  | M | I |
| 4  | N <sub>2</sub> O <sub>off</sub> | 541        | 20   | 3.76 | 541        | 20   | 3.76  | 100.02       | 0.01  | M | I |
| 5  | NH <sub>eff</sub>               | 44.8       | 2.2  | 5.00 | 45.1       | 2.1  | 4.60  | 100.74       | 7.33  | M | I |
| 6  | NH <sub>in</sub>                | 98.1       | 4.9  | 5.00 | 96.5       | 2.8  | 2.88  | 98.37        | 43.31 | M | I |
| 7  | NO <sub>2eff</sub>              | 50.6       | 2.5  | 5.00 | 51.1       | 2.3  | 4.49  | 100.84       | 9.43  | M | I |
| 8  | NO <sub>3eff</sub>              | 0.4        | 0.0  | 5.00 | 0.4        | 0.0  | 5.00  | 100.01       | 0.00  | M | I |
| 9  | NO <sub>off</sub>               | 33         | 1    | 1.73 | 33         | 1    | 1.73  | 100.00       | 0.00  | M | I |
| 10 | O <sub>2aer</sub>               | 210,170    | 12   | 0.01 | 210,170    | 12   | 0.01  | 100.00       | 0.00  | M | I |
| 11 | O <sub>2off</sub>               | 191,611    | 224  | 0.12 | 191,612    | 224  | 0.12  | 100.00       | 0.00  | M | I |
| 12 | Q <sub>aer</sub>                | 2,114      | 44   | 2    | 2,114      | 44   | 2.06  | 100.00       | 0.00  | M | I |
| 13 | Q <sub>in</sub>                 | 27.28      | 0.15 | 0.55 | 27.28      | 0.15 | 0.55  | 100.00       | 0.00  | M | I |
| #  | Var                             | calculated | std  | sD%  | reconciled | std  | sD%   | $\Delta(\%)$ | i(%)  | M | I |
| 14 | Q <sub>inf</sub>                | 832        | 159  | 19   | 877        | 148  | 16.89 | 105.36       | 7.00  | U | I |
| 15 | Q <sub>off</sub>                | 3,093      | 161  | 5    | 3,118      | 148  | 4.75  | 100.82       | 8.17  | U | I |
| 16 | (TIC:NH) <sub>in</sub>          | 1.06       | 0.08 | 7    | 1.09       | 0.04 | 4.03  | 102.50       | 44.30 | U | I |

Table B11b. Gross error detection

| Test                                                                                                                      | Evaluation                                                                                                                                                                                                                                                                                                                                                                                                                                                                                                                                                                                                                                                                                                                                                                                                                                                                                                                                                                                                                                                                                                                                                                                                                                                                                                                                                                                                                                                                                           |          |             |             |             |             |         |       |                    |      |      |      |      |   |                    |      |      |      |      |   |                   |   |      |   |      |   |                                 |      |      |      |      |   |                   |      |      |      |      |   |                  |      |      |      |      |   |                    |      |      |      |      |   |                   |      |      |      |      |   |                   |      |      |      |      |    |                   |      |      |      |      |    |                  |      |      |      |      |    |                 |   |      |   |      |
|---------------------------------------------------------------------------------------------------------------------------|------------------------------------------------------------------------------------------------------------------------------------------------------------------------------------------------------------------------------------------------------------------------------------------------------------------------------------------------------------------------------------------------------------------------------------------------------------------------------------------------------------------------------------------------------------------------------------------------------------------------------------------------------------------------------------------------------------------------------------------------------------------------------------------------------------------------------------------------------------------------------------------------------------------------------------------------------------------------------------------------------------------------------------------------------------------------------------------------------------------------------------------------------------------------------------------------------------------------------------------------------------------------------------------------------------------------------------------------------------------------------------------------------------------------------------------------------------------------------------------------------|----------|-------------|-------------|-------------|-------------|---------|-------|--------------------|------|------|------|------|---|--------------------|------|------|------|------|---|-------------------|---|------|---|------|---|---------------------------------|------|------|------|------|---|-------------------|------|------|------|------|---|------------------|------|------|------|------|---|--------------------|------|------|------|------|---|-------------------|------|------|------|------|---|-------------------|------|------|------|------|----|-------------------|------|------|------|------|----|------------------|------|------|------|------|----|-----------------|---|------|---|------|
| <b>Global test</b><br>System degree of redundancy = 1<br>t-statistic = 1.72, $\chi^2_{1-0.05,1} = 3.84$<br>p-value = 0.19 | no gross error detected                                                                                                                                                                                                                                                                                                                                                                                                                                                                                                                                                                                                                                                                                                                                                                                                                                                                                                                                                                                                                                                                                                                                                                                                                                                                                                                                                                                                                                                                              |          |             |             |             |             |         |       |                    |      |      |      |      |   |                    |      |      |      |      |   |                   |   |      |   |      |   |                                 |      |      |      |      |   |                   |      |      |      |      |   |                  |      |      |      |      |   |                    |      |      |      |      |   |                   |      |      |      |      |   |                   |      |      |      |      |    |                   |      |      |      |      |    |                  |      |      |      |      |    |                 |   |      |   |      |
| <b>Measurement test</b><br>Degree of freedom = 1<br>t-statistic <sub>max</sub> = 1.96<br>p-value <sub>min</sub> = 0.03    | no gross error detected<br><table border="1"> <thead> <tr> <th>#</th> <th>Var</th> <th>residual</th> <th>error</th> <th>t-statistic</th> <th>p-value</th> </tr> </thead> <tbody> <tr> <td>1</td> <td>CO<sub>2aer</sub></td> <td>0.00</td> <td>0.00</td> <td>0.40</td> <td>0.35</td> </tr> <tr> <td>2</td> <td>CO<sub>2off</sub></td> <td>0.27</td> <td>0.67</td> <td>0.40</td> <td>0.35</td> </tr> <tr> <td>3</td> <td>COD<sub>in</sub></td> <td>-</td> <td>0.00</td> <td>-</td> <td>0.50</td> </tr> <tr> <td>4</td> <td>N<sub>2</sub>O<sub>off</sub></td> <td>0.12</td> <td>0.31</td> <td>0.40</td> <td>0.35</td> </tr> <tr> <td>5</td> <td>NH<sub>eff</sub></td> <td>0.33</td> <td>0.84</td> <td>0.40</td> <td>0.35</td> </tr> <tr> <td>6</td> <td>NH<sub>in</sub></td> <td>1.60</td> <td>4.04</td> <td>0.40</td> <td>0.35</td> </tr> <tr> <td>7</td> <td>NO<sub>2eff</sub></td> <td>0.42</td> <td>1.07</td> <td>0.40</td> <td>0.35</td> </tr> <tr> <td>8</td> <td>NO<sub>off</sub></td> <td>0.00</td> <td>0.00</td> <td>0.40</td> <td>0.35</td> </tr> <tr> <td>9</td> <td>O<sub>2aer</sub></td> <td>0.00</td> <td>0.00</td> <td>0.40</td> <td>0.35</td> </tr> <tr> <td>10</td> <td>O<sub>2off</sub></td> <td>0.00</td> <td>0.00</td> <td>0.40</td> <td>0.35</td> </tr> <tr> <td>11</td> <td>Q<sub>aer</sub></td> <td>0.63</td> <td>1.58</td> <td>0.40</td> <td>0.35</td> </tr> <tr> <td>12</td> <td>Q<sub>in</sub></td> <td>-</td> <td>0.00</td> <td>-</td> <td>0.50</td> </tr> </tbody> </table> | #        | Var         | residual    | error       | t-statistic | p-value | 1     | CO <sub>2aer</sub> | 0.00 | 0.00 | 0.40 | 0.35 | 2 | CO <sub>2off</sub> | 0.27 | 0.67 | 0.40 | 0.35 | 3 | COD <sub>in</sub> | - | 0.00 | - | 0.50 | 4 | N <sub>2</sub> O <sub>off</sub> | 0.12 | 0.31 | 0.40 | 0.35 | 5 | NH <sub>eff</sub> | 0.33 | 0.84 | 0.40 | 0.35 | 6 | NH <sub>in</sub> | 1.60 | 4.04 | 0.40 | 0.35 | 7 | NO <sub>2eff</sub> | 0.42 | 1.07 | 0.40 | 0.35 | 8 | NO <sub>off</sub> | 0.00 | 0.00 | 0.40 | 0.35 | 9 | O <sub>2aer</sub> | 0.00 | 0.00 | 0.40 | 0.35 | 10 | O <sub>2off</sub> | 0.00 | 0.00 | 0.40 | 0.35 | 11 | Q <sub>aer</sub> | 0.63 | 1.58 | 0.40 | 0.35 | 12 | Q <sub>in</sub> | - | 0.00 | - | 0.50 |
| #                                                                                                                         | Var                                                                                                                                                                                                                                                                                                                                                                                                                                                                                                                                                                                                                                                                                                                                                                                                                                                                                                                                                                                                                                                                                                                                                                                                                                                                                                                                                                                                                                                                                                  | residual | error       | t-statistic | p-value     |             |         |       |                    |      |      |      |      |   |                    |      |      |      |      |   |                   |   |      |   |      |   |                                 |      |      |      |      |   |                   |      |      |      |      |   |                  |      |      |      |      |   |                    |      |      |      |      |   |                   |      |      |      |      |   |                   |      |      |      |      |    |                   |      |      |      |      |    |                  |      |      |      |      |    |                 |   |      |   |      |
| 1                                                                                                                         | CO <sub>2aer</sub>                                                                                                                                                                                                                                                                                                                                                                                                                                                                                                                                                                                                                                                                                                                                                                                                                                                                                                                                                                                                                                                                                                                                                                                                                                                                                                                                                                                                                                                                                   | 0.00     | 0.00        | 0.40        | 0.35        |             |         |       |                    |      |      |      |      |   |                    |      |      |      |      |   |                   |   |      |   |      |   |                                 |      |      |      |      |   |                   |      |      |      |      |   |                  |      |      |      |      |   |                    |      |      |      |      |   |                   |      |      |      |      |   |                   |      |      |      |      |    |                   |      |      |      |      |    |                  |      |      |      |      |    |                 |   |      |   |      |
| 2                                                                                                                         | CO <sub>2off</sub>                                                                                                                                                                                                                                                                                                                                                                                                                                                                                                                                                                                                                                                                                                                                                                                                                                                                                                                                                                                                                                                                                                                                                                                                                                                                                                                                                                                                                                                                                   | 0.27     | 0.67        | 0.40        | 0.35        |             |         |       |                    |      |      |      |      |   |                    |      |      |      |      |   |                   |   |      |   |      |   |                                 |      |      |      |      |   |                   |      |      |      |      |   |                  |      |      |      |      |   |                    |      |      |      |      |   |                   |      |      |      |      |   |                   |      |      |      |      |    |                   |      |      |      |      |    |                  |      |      |      |      |    |                 |   |      |   |      |
| 3                                                                                                                         | COD <sub>in</sub>                                                                                                                                                                                                                                                                                                                                                                                                                                                                                                                                                                                                                                                                                                                                                                                                                                                                                                                                                                                                                                                                                                                                                                                                                                                                                                                                                                                                                                                                                    | -        | 0.00        | -           | 0.50        |             |         |       |                    |      |      |      |      |   |                    |      |      |      |      |   |                   |   |      |   |      |   |                                 |      |      |      |      |   |                   |      |      |      |      |   |                  |      |      |      |      |   |                    |      |      |      |      |   |                   |      |      |      |      |   |                   |      |      |      |      |    |                   |      |      |      |      |    |                  |      |      |      |      |    |                 |   |      |   |      |
| 4                                                                                                                         | N <sub>2</sub> O <sub>off</sub>                                                                                                                                                                                                                                                                                                                                                                                                                                                                                                                                                                                                                                                                                                                                                                                                                                                                                                                                                                                                                                                                                                                                                                                                                                                                                                                                                                                                                                                                      | 0.12     | 0.31        | 0.40        | 0.35        |             |         |       |                    |      |      |      |      |   |                    |      |      |      |      |   |                   |   |      |   |      |   |                                 |      |      |      |      |   |                   |      |      |      |      |   |                  |      |      |      |      |   |                    |      |      |      |      |   |                   |      |      |      |      |   |                   |      |      |      |      |    |                   |      |      |      |      |    |                  |      |      |      |      |    |                 |   |      |   |      |
| 5                                                                                                                         | NH <sub>eff</sub>                                                                                                                                                                                                                                                                                                                                                                                                                                                                                                                                                                                                                                                                                                                                                                                                                                                                                                                                                                                                                                                                                                                                                                                                                                                                                                                                                                                                                                                                                    | 0.33     | 0.84        | 0.40        | 0.35        |             |         |       |                    |      |      |      |      |   |                    |      |      |      |      |   |                   |   |      |   |      |   |                                 |      |      |      |      |   |                   |      |      |      |      |   |                  |      |      |      |      |   |                    |      |      |      |      |   |                   |      |      |      |      |   |                   |      |      |      |      |    |                   |      |      |      |      |    |                  |      |      |      |      |    |                 |   |      |   |      |
| 6                                                                                                                         | NH <sub>in</sub>                                                                                                                                                                                                                                                                                                                                                                                                                                                                                                                                                                                                                                                                                                                                                                                                                                                                                                                                                                                                                                                                                                                                                                                                                                                                                                                                                                                                                                                                                     | 1.60     | 4.04        | 0.40        | 0.35        |             |         |       |                    |      |      |      |      |   |                    |      |      |      |      |   |                   |   |      |   |      |   |                                 |      |      |      |      |   |                   |      |      |      |      |   |                  |      |      |      |      |   |                    |      |      |      |      |   |                   |      |      |      |      |   |                   |      |      |      |      |    |                   |      |      |      |      |    |                  |      |      |      |      |    |                 |   |      |   |      |
| 7                                                                                                                         | NO <sub>2eff</sub>                                                                                                                                                                                                                                                                                                                                                                                                                                                                                                                                                                                                                                                                                                                                                                                                                                                                                                                                                                                                                                                                                                                                                                                                                                                                                                                                                                                                                                                                                   | 0.42     | 1.07        | 0.40        | 0.35        |             |         |       |                    |      |      |      |      |   |                    |      |      |      |      |   |                   |   |      |   |      |   |                                 |      |      |      |      |   |                   |      |      |      |      |   |                  |      |      |      |      |   |                    |      |      |      |      |   |                   |      |      |      |      |   |                   |      |      |      |      |    |                   |      |      |      |      |    |                  |      |      |      |      |    |                 |   |      |   |      |
| 8                                                                                                                         | NO <sub>off</sub>                                                                                                                                                                                                                                                                                                                                                                                                                                                                                                                                                                                                                                                                                                                                                                                                                                                                                                                                                                                                                                                                                                                                                                                                                                                                                                                                                                                                                                                                                    | 0.00     | 0.00        | 0.40        | 0.35        |             |         |       |                    |      |      |      |      |   |                    |      |      |      |      |   |                   |   |      |   |      |   |                                 |      |      |      |      |   |                   |      |      |      |      |   |                  |      |      |      |      |   |                    |      |      |      |      |   |                   |      |      |      |      |   |                   |      |      |      |      |    |                   |      |      |      |      |    |                  |      |      |      |      |    |                 |   |      |   |      |
| 9                                                                                                                         | O <sub>2aer</sub>                                                                                                                                                                                                                                                                                                                                                                                                                                                                                                                                                                                                                                                                                                                                                                                                                                                                                                                                                                                                                                                                                                                                                                                                                                                                                                                                                                                                                                                                                    | 0.00     | 0.00        | 0.40        | 0.35        |             |         |       |                    |      |      |      |      |   |                    |      |      |      |      |   |                   |   |      |   |      |   |                                 |      |      |      |      |   |                   |      |      |      |      |   |                  |      |      |      |      |   |                    |      |      |      |      |   |                   |      |      |      |      |   |                   |      |      |      |      |    |                   |      |      |      |      |    |                  |      |      |      |      |    |                 |   |      |   |      |
| 10                                                                                                                        | O <sub>2off</sub>                                                                                                                                                                                                                                                                                                                                                                                                                                                                                                                                                                                                                                                                                                                                                                                                                                                                                                                                                                                                                                                                                                                                                                                                                                                                                                                                                                                                                                                                                    | 0.00     | 0.00        | 0.40        | 0.35        |             |         |       |                    |      |      |      |      |   |                    |      |      |      |      |   |                   |   |      |   |      |   |                                 |      |      |      |      |   |                   |      |      |      |      |   |                  |      |      |      |      |   |                    |      |      |      |      |   |                   |      |      |      |      |   |                   |      |      |      |      |    |                   |      |      |      |      |    |                  |      |      |      |      |    |                 |   |      |   |      |
| 11                                                                                                                        | Q <sub>aer</sub>                                                                                                                                                                                                                                                                                                                                                                                                                                                                                                                                                                                                                                                                                                                                                                                                                                                                                                                                                                                                                                                                                                                                                                                                                                                                                                                                                                                                                                                                                     | 0.63     | 1.58        | 0.40        | 0.35        |             |         |       |                    |      |      |      |      |   |                    |      |      |      |      |   |                   |   |      |   |      |   |                                 |      |      |      |      |   |                   |      |      |      |      |   |                  |      |      |      |      |   |                    |      |      |      |      |   |                   |      |      |      |      |   |                   |      |      |      |      |    |                   |      |      |      |      |    |                  |      |      |      |      |    |                 |   |      |   |      |
| 12                                                                                                                        | Q <sub>in</sub>                                                                                                                                                                                                                                                                                                                                                                                                                                                                                                                                                                                                                                                                                                                                                                                                                                                                                                                                                                                                                                                                                                                                                                                                                                                                                                                                                                                                                                                                                      | -        | 0.00        | -           | 0.50        |             |         |       |                    |      |      |      |      |   |                    |      |      |      |      |   |                   |   |      |   |      |   |                                 |      |      |      |      |   |                   |      |      |      |      |   |                  |      |      |      |      |   |                    |      |      |      |      |   |                   |      |      |      |      |   |                   |      |      |      |      |    |                   |      |      |      |      |    |                  |      |      |      |      |    |                 |   |      |   |      |
| <b>Nodal test</b><br>Degree of freedom = 1<br>t-statistic <sub>max</sub> = 1.96<br>p-value <sub>min</sub> = 0.03          | no gross error detected<br><table border="1"> <thead> <tr> <th>#</th> <th>misbalance</th> <th>error</th> <th>t-statistic</th> <th>p-value</th> </tr> </thead> <tbody> <tr> <td>1</td> <td>1,954</td> <td>4,948</td> <td>0.39</td> <td>0.35</td> </tr> </tbody> </table>                                                                                                                                                                                                                                                                                                                                                                                                                                                                                                                                                                                                                                                                                                                                                                                                                                                                                                                                                                                                                                                                                                                                                                                                                              | #        | misbalance  | error       | t-statistic | p-value     | 1       | 1,954 | 4,948              | 0.39 | 0.35 |      |      |   |                    |      |      |      |      |   |                   |   |      |   |      |   |                                 |      |      |      |      |   |                   |      |      |      |      |   |                  |      |      |      |      |   |                    |      |      |      |      |   |                   |      |      |      |      |   |                   |      |      |      |      |    |                   |      |      |      |      |    |                  |      |      |      |      |    |                 |   |      |   |      |
| #                                                                                                                         | misbalance                                                                                                                                                                                                                                                                                                                                                                                                                                                                                                                                                                                                                                                                                                                                                                                                                                                                                                                                                                                                                                                                                                                                                                                                                                                                                                                                                                                                                                                                                           | error    | t-statistic | p-value     |             |             |         |       |                    |      |      |      |      |   |                    |      |      |      |      |   |                   |   |      |   |      |   |                                 |      |      |      |      |   |                   |      |      |      |      |   |                  |      |      |      |      |   |                    |      |      |      |      |   |                   |      |      |      |      |   |                   |      |      |      |      |    |                   |      |      |      |      |    |                  |      |      |      |      |    |                 |   |      |   |      |
| 1                                                                                                                         | 1,954                                                                                                                                                                                                                                                                                                                                                                                                                                                                                                                                                                                                                                                                                                                                                                                                                                                                                                                                                                                                                                                                                                                                                                                                                                                                                                                                                                                                                                                                                                | 4,948    | 0.39        | 0.35        |             |             |         |       |                    |      |      |      |      |   |                    |      |      |      |      |   |                   |   |      |   |      |   |                                 |      |      |      |      |   |                   |      |      |      |      |   |                  |      |      |      |      |   |                    |      |      |      |      |   |                   |      |      |      |      |   |                   |      |      |      |      |    |                   |      |      |      |      |    |                  |      |      |      |      |    |                 |   |      |   |      |

## References

- Fletcher, 2000. Practical methods of optimization. Wiley and Sons, Ltd. ISBN:9780471915478
- Le Q. H., 2019. Mass-Balance-based Experimental Design and Data Reconciliation for Wastewater Treatment Processes, PhD thesis, Department of Green Chemistry and Technology, Ghent University, Belgium. ISBN 978-94-6357-245-3
- Mampaey, K.E., De Kreuk, M.K., van Dongen, U.G.J.M., van Loosdrecht, M.C.M., Volcke, E.I.P., 2016. Identifying N<sub>2</sub>O formation and emissions from a full-scale partial nitrification reactor. *Water Res.* 88, 575–585. <https://doi.org/10.1016/j.watres.2015.10.047>
- Narasimhan, S., Jordache, C., 2000. Data reconciliation and gross error detection : an intelligent use of process data, *Annals of the New York Academy of Sciences*. Gulf Publishing Company, Houston, Texas, US. <https://doi.org/10.1111/j.1749-6632.1972.tb54778.x>
- Verheijen, P.J.T., 2010. Data reconciliation and error detection, in: *The Metabolic Pathway Engineering Handbook : Fundamentals*. CRC Press/Taylor & Francis, Boca Raton.
